# Supplementary material for: Serial microbubble imaging technology (sMBI) for rapid screening of hydrogen-evolution materials used in photocatalytic water-splitting reactions
Source: Royal Society of Chemistry journal article supplement (doi:10.1039/c6ay03406c), 2017-01-01
Supplement: c6ay03406c1.pdf [file c6ay03406c1.pdf]

## Electronic supporting information (ESI)

Serial microbubble imaging technology (sMBI) for rapid screening of hydrogen-evolution materials used in photocatalytic water-splitting reactions

Jiarui Zhang, Jianchao Lee<sup>a</sup>, Liping Wang, Yunyun Zheng, Wenxiao Wang, Jiabo Guo, Jinhong Gao

Lab of Env-Mat, Department of Environmental Science, Shaanxi Normal University, No.620 West

Chang'an Road, Chang'an District, Xi'an 710062, China.

E-mail: [jianchaolee@snnu.edu.cn](mailto:jianchaolee@snnu.edu.cn); [zhangjiarui@snnu.edu.cn](mailto:zhangjiarui@snnu.edu.cn); Fax:+96-29-85310526; Tel: +86-29-85310525

## Some Experimental Methods

### Preparation of microreactor chip

The microreactor (denoted as MR-chip) including thousands of tiny units ( $500 \times 500 \mu\text{m}$ ) was obtained by UV-lithography technique, and the tiny units possess hydrophobic borders and hydrophilic cavity. The typical preparation was schematically depicted in Figure S1. Firstly, thin negative photosensitive resin (poly vinyl laurate) was evenly spin-coated over the surface of a glass slide ( $25 \times 75 \text{ mm}^2$ ) at 3000 rpm for 40 s (Figure S1b). The thickness of the photoresist layer was about  $5 \mu\text{m}$ . After the photoresist was soft-baked on a hot plate at 353 K for 10 min, a photomask with unique micro-grid pattern was closely attached to it. Then the glass slide was exposed at a 365-nm-UV lamp for 4 min followed by postbaking at 333 K for 3 min (Figure S1c). The slide was dipped in a developing solution (1 % (wt./vol.) sodium carbonate) for 2 min (Figure S1d), accordingly, an insoluble and resistant network structure was formed (Figure S1e).

### Preparation of metal precursor inks

Six metal precursor solutions  $\text{Ni}(\text{NO}_3)_2$  (0.2 M),  $\text{Zn}(\text{NO}_3)_2$  (0.2 M),  $\text{Cd}(\text{NO}_3)_2$  (0.2 M),  $\text{Y}(\text{NO}_3)_3$  (0.2 M),  $\text{Co}(\text{NO}_3)_2$  (0.2 M),  $\text{In}_2(\text{SO}_4)_3$  (0.1 M), were used as the printing inks. The metal inks were adjusted to pH 5 with 1 M sodium hydroxide or nitric acid solutions. The surface tension of the metal ink was adjusted using ethylene glycol butyl ether (EBGE): proper amount of EBGE dispersed in the premixed solvent followed by sonicated for 30 min to make the metal inks consistent exactly with original ink.

### Pre-treatment of MR-chip

After preparing the MR-chip, the main component of the WS catalysts, the  $\text{TiO}_2$  nanoparticles (100% anatase, particle size: 20-40 nm) was uniformly added to all the reaction units on the chips. The details of this process are as follows.  $\text{TiO}_2$  nanoparticles (100 mg, 100% anatase, particle size: 20-40 nm) was dispersed in 10 ml of an ethylene glycol solutions (10 vol%) using sonication to obtain a uniform suspension. Then the  $\text{TiO}_2$  suspension was evenly and quantitatively sprayed onto a MR-chip using an airbrush. Next, the MR-chip was sonicated for 30 min to uniformly distribute the  $\text{TiO}_2$  nanoparticles over all the unit cells on the matrix. To reinforce the adhesion of  $\text{TiO}_2$  on the surface of chips, glacial acetic acid was lightly coated on the MR-chip and left for 10 minutes. After this, the MR-chip was heated at 573 K for 1 h. The treated MR-chip was stored in a vessel after cooling to room temperature.

### Post-treatment of MR-chip

After the inks were printed, the chip was sulfurized to produce the sulfide-modified catalysts. This was accomplished by first placing the MR-chip into a 50 mL Teflon autoclave containing 5 ml of 0.2 M thiourea aqueous solution. Then the autoclave was heated at 478 K for 12 h. The treated chip was calcined at 573 K for 1 h under  $\text{N}_2$  atmosphere to produce a stable crystalline material.

### Verifying reactions

The activities of the selected catalysts were determined using conventional batch experiments. This was accomplished using two processes. The first step was to prepare corresponding large scale catalysts. About 3 g  $\text{TiO}_2$  was dispersed in 30 ml ethylene glycol solutions (10 vol%) by ultrasonic

oscillation. The resulting suspensoid was evenly applied onto clean glass slides. Then the slides were calcined at 573 K for 1 h. Next, a select mixed-metal solution was sprayed onto the glass slides using an airbrush. Then, the glass slides were vulcanized as described above. The second step was the WS reaction process. Photocatalytic reactions were performed in a 100 ml Pyrex cell. A low pressure Hg UV lamp (with nominal power absorption of 36 W, emitting light at wavelengths about 254 nm) was positioned 5 cm away from the reactor. When running, the catalyst slide was immersed in an aqueous solution (75 ml, containing 60 cm<sup>3</sup> water and 15 cm<sup>3</sup> CH<sub>3</sub>OH as electron donors). Then, the gas mixture in the reactor was analyzed using a gas chromatograph.

### **Characterization and analytical methods**

The surface morphology of the catalysts was studied using scanning electron microscopy (SEM TM3030). XPS spectra of the catalysts were investigated in an AXIS-Ultra X-ray photoelectron spectroscopy (Kratos Analytical Ltd, Shimadzu Corporation). The morphology and dimension of the synthesized catalysts were observed using a transmission electron microscope (TEM Tecnai G2 F20). A digital color CCD camera was utilized to capture microbubble evolution images of the reaction area on the chip. The volume of microbubbles was measured using Image-Pro Plus (IPP) software. The amount of H<sub>2</sub> evolution was analyzed by gas chromatography (GC-14, Shimadzu, Japan) equipped with a thermal conductivity detector (TCD).

### **Some supplementary analysis and discussion**

#### **Discussion of these sulfides**

An appropriate co-catalyst can accommodate the photogenerated charge carriers, suppress charge recombination and provide designated redox reaction sites to avoid back reactions. Therefore our purpose was to synthesize a sulfide cocatalyst with TiO<sub>2</sub> through the printing technology. Some studies have demonstrated that pure TiO<sub>2</sub> has activity for photocatalytic H<sub>2</sub> evolution, but the activity is extremely low, because of the rapid recombination between electrons and holes, the fast backward reaction (recombination of hydrogen and oxygen into water), and the presence of a large H<sub>2</sub> production overpotential on TiO<sub>2</sub> surface. While the conduction band edge of M<sub>6</sub>S (M= Ni, Zn, Cd, Y, Co, In) is at a more positive potential than the TiO<sub>2</sub>, the photogenerated electrons in the M<sub>6</sub>S cannot be transferred to TiO<sub>2</sub> surface. Therefore, M<sub>6</sub>S only works as a cocatalyst rather than a combined semiconductor catalyst.

#### **Mechanism for the photocatalytic hydrogen evolution**

TEM image (Fig.S2d) shows that the surface of TiO<sub>2</sub> contained different nano particles of M<sub>6</sub>S. This structure can easily explain the mechanisms of photocatalysis. Once the sulfide-modified catalysts are under light irradiation, the VB electrons of TiO<sub>2</sub> are excited to CB and then the photo-induced electrons in the CB can transfer to M<sub>6</sub>S clusters, finally, forming M clusters (reaction (2)). On the other hand, an ohmic-type contact is formed at the M<sub>6</sub>S/M interface, enabling charges to flow easily across the junction. M<sub>6</sub>S cocatalysts accept electrons, which are generated by the M metal and adsorb H<sup>+</sup> which can either originate from water or the sacrificial reagent (lactic acid), eventually generating H<sub>2</sub> (reactions (3), (4)). Therefore, it was not surprising that M<sub>6</sub>S performs as cocatalyst that can improve the sulfide-modified catalysts's performance.

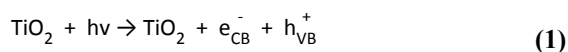

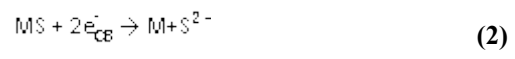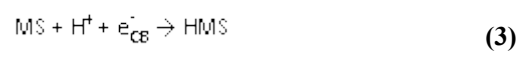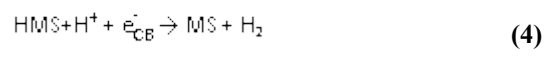

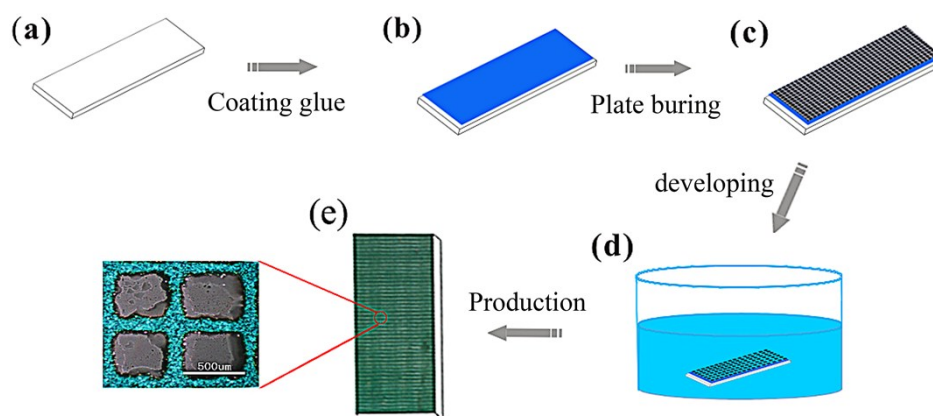

**Fig. S1** Preparation processes of microreactor chip. (a) A clean glass, (b) The photosensitive resin was evenly spin-coated, (c) The glass slide was exposed, (d) The slide was dipped in developing solution, (e) Photography of grids on a MR-chip after development, and the microphotograph of aqueous solution on the chip.

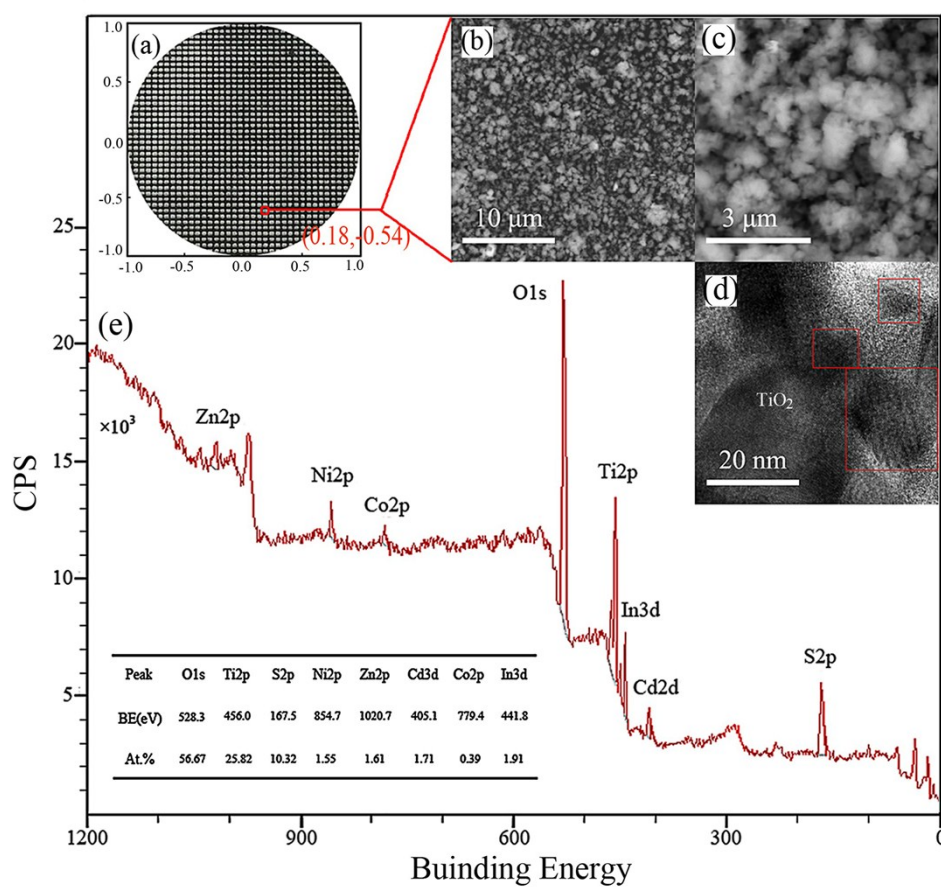

**Fig. S2** Analysis of the composite catalyst: (a) overall catalyst library, (b, c) SEM micrograph of reactant unit at (0.18, -0.54), (d) TEM micrograph and (e) XPS spectrum.

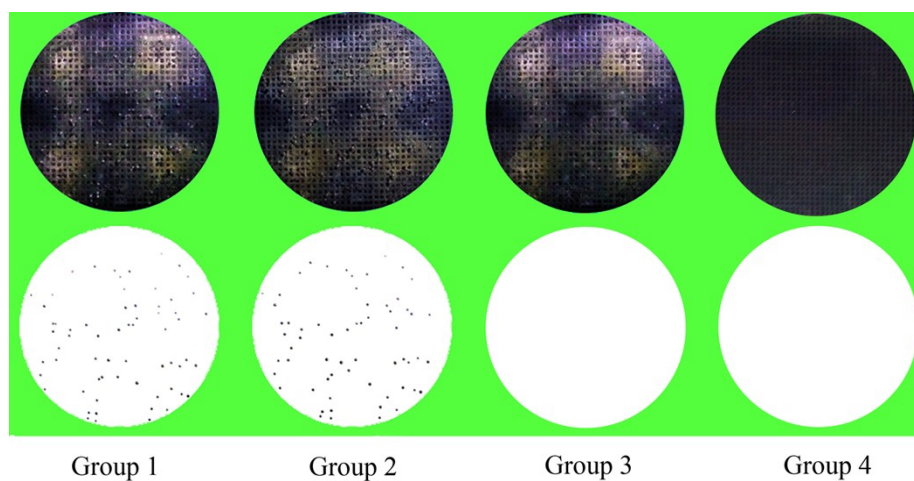

**Fig. S3** Results of main tests, parallel tests and blank tests at the stage of 10 minutes. Group 1: Results of the main test, Group 2: Results of the parallel test, Group 3: Results of the blank tests only without UV light, Group 4: Results of the blank tests only without catalysts.

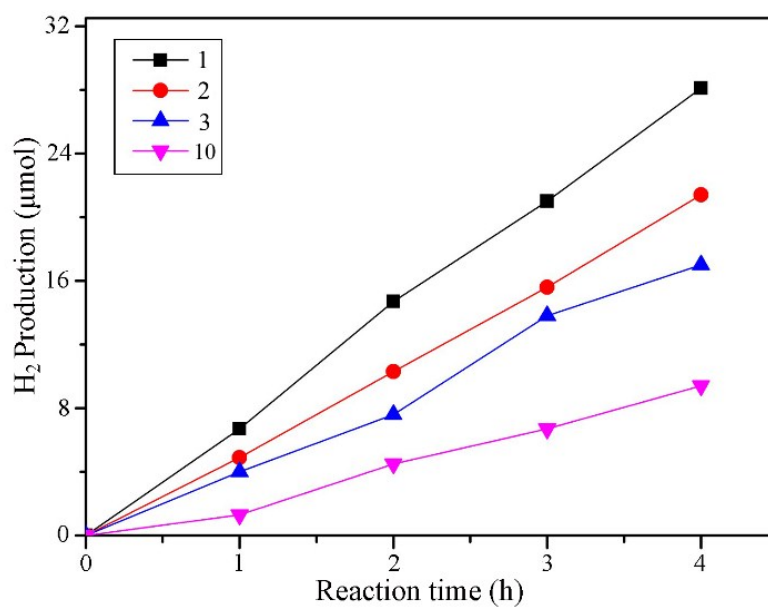

**Fig. S4** The performances of photocatalysts in bath reactions for above four catalysts.

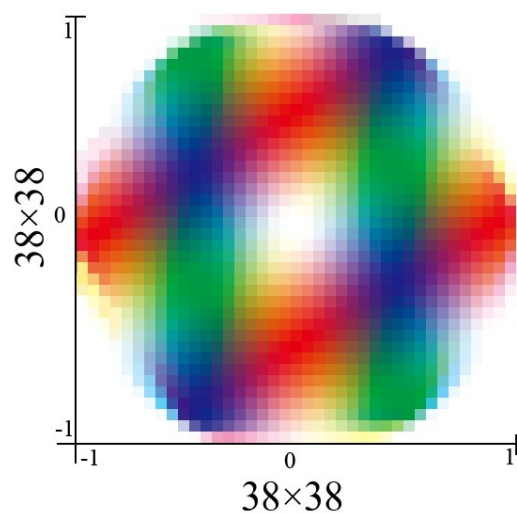

| Line Number | Coding Range | Line Number | Coding Range | Line Number | Coding Range |
|-------------|--------------|-------------|--------------|-------------|--------------|
| 1           | 1-18         | 14          | 403-440      | 27          | 897-934      |
| 2           | 19-40        | 15          | 441-478      | 28          | 935-972      |
| 3           | 41-67        | 16          | 479-516      | 29          | 973-1007     |
| 4           | 68-94        | 17          | 517-554      | 30          | 1008-1042    |
| 5           | 95-124       | 18          | 555-592      | 31          | 1043-1074    |
| 6           | 125-154      | 19          | 593-630      | 32          | 1075-1106    |
| 7           | 155-186      | 20          | 631-668      | 33          | 1107-1136    |
| 8           | 187-218      | 21          | 669-706      | 34          | 1137-1166    |
| 9           | 219-253      | 22          | 707-744      | 35          | 1167-1193    |
| 10          | 254-288      | 23          | 745-782      | 36          | 1194-1220    |
| 11          | 287-326      | 24          | 783-820      | 37          | 1121-1242    |
| 12          | 327-364      | 25          | 821-858      | 38          | 1143-1260    |
| 13          | 365-402      | 26          | 859-896      |             |              |

**Fig. S5** The position design of 1260 react units in the catalyst library and the coding range of each line on the MR-chip.

**Table S1.** Locations and relative error of the microbubbles at 10 min. ((X,Y)<sub>1</sub> stand for the main experiment, (X,Y)<sub>2</sub> represent the parallel experiment)

Note: The general locating method was taking the template's center as the origin of coordinates.

| Catalyst<br>No. | Coordinates       |                   | X relative error | Y relative error |
|-----------------|-------------------|-------------------|------------------|------------------|
|                 | (XY) <sub>1</sub> | (XY) <sub>2</sub> | no               | no               |
| 1               | -0.46,0.54        | -0.49,0.53        | 1%               | 1%               |
| 2               | -0.24,0.59        | -0.24,0.59        | 0%               | 0%               |
| 3               | -0.04,0.55        | -0.06,0.56        | 1%               | 0%               |
| 4               | 0.18,0.54         | 0.14,0.53         | 2%               | 2%               |
| 5               | 0.42,0.72         | 0.36,0.69         | 3%               | 1%               |
| 6               | 0.60,0.60         | 0.53,0.59         | 3%               | 1%               |
| 7               | 0.76,0.54         | 0.65,0.49         | 5%               | 3%               |
| 8               | -0.87,0.31        | -0.89,0.33        | 1%               | 1%               |
| 9               | -0.66,0.31        | -0.72,0.31        | 3%               | 0%               |
| 10              | 0.01,0.49         | 0.00,0.50         | 1%               | 0%               |
| 11              | 0.08,0.33         | 0.06,0.34         | 1%               | 1%               |
| 12              | -0.74,0.20        | -0.77,0.20        | 1%               | 0%               |
| 13              | 0.07,0.18         | 0.08,0.15         | 1%               | 2%               |
| 14              | 0.16,0.21         | 0.15,0.23         | 0%               | 1%               |
| 15              | 0.40,0.21         | 0.35,0.19         | 3%               | 1%               |
| 16              | 0.52,0.27         | 0.46,0.28         | 3%               | 1%               |
| 17              | -0.66,0.03        | -0.69,0.06        | 2%               | 2%               |
| 18              | -0.63,0.03        | -0.64,0.02        | 1%               | 0%               |
| 19              | -0.33,0.02        | -0.33,0.02        | 0%               | 0%               |
| 20              | 0.21,0.08         | 0.19,0.09         | 1%               | 1%               |
| 21              | 0.39,0.14         | 0.37,0.15         | 1%               | 1%               |
| 22              | 0.56,0.13         | 0.55,0.17         | 0%               | 2%               |
| 23              | 0.59,0.07         | 0.60,0.11         | 0%               | 2%               |
| 24              | 0.86,0.12         | 0.79,0.13         | 4%               | 0%               |
| 25              | -0.65,-0.05       | -0.63,-0.04       | 1%               | 0%               |
| 26              | -0.49,-0.09       | -0.53,-0.07       | 2%               | 1%               |
| 27              | -0.21,-0.10       | -0.20,-0.08       | 1%               | 1%               |
| 28              | -0.02,-0.03       | -0.04,-0.04       | 1%               | 0%               |
| 29              | 0.10,0.01         | 0.09,0.03         | 0%               | 1%               |
| 30              | 0.14,0.02         | 0.13,0.05         | 0%               | 2%               |
| 31              | 0.46,-0.03        | 0.44,-0.02        | 1%               | 1%               |
| 32              | -0.60,-0.21       | -0.61,-0.24       | 1%               | 2%               |
| 33              | -0.76,-0.35       | -0.73,-0.34       | 1%               | 1%               |
| 34              | -0.62,-0.33       | -0.63,-0.33       | 1%               | 0%               |
| 35              | -0.22,-0.30       | -0.22,-0.33       | 0%               | 1%               |
| 36              | 0.06,-0.34        | 0.02,-0.32        | 2%               | 1%               |
| 37              | 0.43,-0.39        | 0.42,-0.36        | 0%               | 2%               |



|           |             |             |    |    |
|-----------|-------------|-------------|----|----|
| <b>38</b> | 0.52,-0.36  | 0.51,-0.32  | 0% | 2% |
| <b>39</b> | 0.60,-0.32  | 0.57,-0.35  | 2% | 2% |
| <b>40</b> | 0.76,-0.37  | 0.76,-0.35  | 0% | 2% |
| <b>41</b> | -0.71,-0.45 | -0.73,-0.45 | 1% | 0% |
| <b>42</b> | -0.20,-0.52 | -0.20,-0.51 | 0% | 0% |
| <b>43</b> | -0.17,-0.49 | -0.20,-0.47 | 1% | 1% |
| <b>44</b> | -0.01,-0.50 | -0.03,-0.45 | 1% | 3% |
| <b>45</b> | 0.17,-0.55  | 0.18,-0.56  | 1% | 0% |
| <b>46</b> | 0.52,-0.59  | 0.51,-0.60  | 1% | 1% |
| <b>47</b> | 0.38,-0.69  | 0.36,-0.70  | 1% | 0% |
| <b>48</b> | 0.62,-0.67  | 0.62,-0.64  | 0% | 2% |
| <b>49</b> | 0.68,-0.68  | 0.68,-0.65  | 0% | 2% |
| <b>50</b> | -0.74,-0.62 | -0.71,-0.61 | 1% | 1% |
| <b>51</b> | -0.36,-0.64 | -0.38,-0.62 | 1% | 1% |
| <b>52</b> | -0.30,-0.85 | -0.29,-0.84 | 1% | 1% |
| <b>53</b> | -0.31,-0.90 | -0.32,-0.89 | 0% | 1% |
| <b>54</b> | -0.23,-0.86 | -0.20,-0.83 | 1% | 1% |
| <b>55</b> | -0.23,-0.93 | -0.21,-0.91 | 1% | 1% |
| <b>56</b> | 0.32,-0.81  | 0.28,-0.79  | 2% | 1% |
| <b>57</b> | 0.30,-0.92  | 0.27,-0.89  | 1% | 1% |
| <b>58</b> | 0.49,-0.85  | 0.46,-0.82  | 2% | 2% |
| <b>59</b> | 0.36,0.37   | 0.33,0.33   | 2% | 2% |
| <b>60</b> | 0.22,0.58   | 0.20,0.55   | 1% | 2% |

---

**Table S2.** The volume values of 96 microbubbles on the MR-chip

| <b>Catalyst</b> | <b>Coordinates</b> | <b>Volumen</b>                    |
|-----------------|--------------------|-----------------------------------|
| <b>No.</b>      | <b>(X,Y)</b>       | <b><math>\mu\text{m}^3</math></b> |
| 1               | 0.18,-0.54         | $8.65 \times 10^7$                |
| 2               | -0.09,-0.33        | $7.60 \times 10^7$                |
| 3               | -0.33,0.02         | $7.25 \times 10^7$                |
| 4               | 0.40,0.21          | $6.55 \times 10^7$                |
| 5               | 0.52,-0.59         | $6.39 \times 10^7$                |
| 6               | 0.08,-0.33         | $5.98 \times 10^7$                |
| 7               | -0.21,-0.08        | $5.96 \times 10^7$                |
| 8               | -0.22,-0.30        | $5.91 \times 10^7$                |
| 9               | 0.76,-0.37         | $5.50 \times 10^7$                |
| 10              | -0.36,-0.62        | $4.91 \times 10^7$                |
| 11              | -0.73,0.21         | $4.76 \times 10^7$                |
| 12              | 0.38,-0.69         | $4.66 \times 10^7$                |
| 13              | 0.44,-0.38         | $4.65 \times 10^7$                |
| 14              | 0.12,0.55          | $4.63 \times 10^7$                |
| 15              | 0.52,0.27          | $4.60 \times 10^7$                |
| 16              | 0.86,0.13          | $4.55 \times 10^7$                |
| 17              | 0.02,-0.79         | $4.45 \times 10^7$                |
| 18              | 0.06,0.19          | $4.24 \times 10^7$                |
| 19              | 0.29,0.12          | $4.24 \times 10^7$                |
| 20              | -0.87,0.31         | $4.21 \times 10^7$                |
| 21              | -0.53,0.37         | $4.10 \times 10^7$                |
| 22              | -0.92,-0.16        | $4.01 \times 10^7$                |
| 23              | -0.24,0.60         | $3.99 \times 10^7$                |
| 24              | -0.21,-0.72        | $3.97 \times 10^7$                |
| 25              | 0.69,-0.67         | $3.93 \times 10^7$                |
| 26              | -0.58,-0.58        | $3.77 \times 10^7$                |
| 27              | 0.53,0.50          | $3.73 \times 10^7$                |
| 28              | 0.30,-0.91         | $3.59 \times 10^7$                |
| 29              | 0.60,0.61          | $3.56 \times 10^7$                |
| 30              | -0.49,-0.02        | $3.54 \times 10^7$                |
| 31              | 0.01,-0.03         | $3.54 \times 10^7$                |
| 32              | -0.04,0.56         | $3.52 \times 10^7$                |
| 33              | -0.46,0.54         | $3.50 \times 10^7$                |
| 34              | 0.31,0.54          | $3.48 \times 10^7$                |
| 35              | -0.04,-0.85        | $3.44 \times 10^7$                |
| 36              | -0.63,0.56         | $3.33 \times 10^7$                |
| 37              | -0.73,-0.60        | $3.23 \times 10^7$                |
| 38              | -0.01,-0.48        | $3.23 \times 10^7$                |
| 39              | 0.21,-0.04         | $3.19 \times 10^7$                |

---

|    |             |                      |
|----|-------------|----------------------|
| 40 | 0.76,-0.37  | 3.18×10 <sup>7</sup> |
| 41 | 0.78,0.43   | 3.16×10 <sup>7</sup> |
| 42 | 0.17,0.21   | 3.14×10 <sup>7</sup> |
| 43 | -0.79,-48   | 3.13×10 <sup>7</sup> |
| 44 | 0.52,-0.35  | 3.13×10 <sup>7</sup> |
| 45 | 0.32,-0.81  | 3.13×10 <sup>7</sup> |
| 46 | 0.31,-0.13  | 3.12×10 <sup>7</sup> |
| 47 | 0.74,0.33   | 3.05×10 <sup>7</sup> |
| 48 | -0.49,-0.08 | 2.85×10 <sup>7</sup> |
| 49 | 0.62,-0.66  | 2.85×10 <sup>7</sup> |
| 50 | 0.60,0.07   | 2.82×10 <sup>7</sup> |
| 51 | -0.61,-0.32 | 2.82×10 <sup>7</sup> |
| 52 | 0.49,-0.84  | 2.81×10 <sup>7</sup> |
| 53 | 0.24,0.58   | 2.75×10 <sup>7</sup> |
| 54 | 0.76,0.55   | 2.63×10 <sup>7</sup> |
| 55 | 0.18,0.08   | 2.62×10 <sup>7</sup> |
| 56 | 0.56,0.13   | 2.62×10 <sup>7</sup> |
| 57 | -0.78,-0.38 | 2.59×10 <sup>7</sup> |
| 58 | 0.14,0.48   | 2.54×10 <sup>7</sup> |
| 59 | -0.65,-0.04 | 2.54×10 <sup>7</sup> |
| 60 | -0.64,0.48  | 2.53×10 <sup>7</sup> |
| 61 | -0.20,-0.51 | 2.46×10 <sup>7</sup> |
| 62 | 0.09,0.03   | 2.37×10 <sup>7</sup> |
| 63 | 0.68,-0.33  | 2.36×10 <sup>7</sup> |
| 64 | 0.46,0.77   | 2.33×10 <sup>7</sup> |
| 65 | -0.22,0.04  | 2.32×10 <sup>7</sup> |
| 66 | 0.06,0.37   | 2.30×10 <sup>7</sup> |
| 67 | -0.22,-0.84 | 2.30×10 <sup>7</sup> |
| 68 | 0.01,0.50   | 2.29×10 <sup>7</sup> |
| 69 | -0.29,-0.84 | 2.19×10 <sup>7</sup> |
| 70 | -0.41,0.67  | 2.18×10 <sup>7</sup> |
| 71 | 0.88,-0.04  | 2.14×10 <sup>7</sup> |
| 72 | -0.75,-0.34 | 2.11×10 <sup>7</sup> |
| 73 | 0.46,-0.02  | 2.10×10 <sup>7</sup> |
| 74 | -0.65,0.04  | 2.09×10 <sup>7</sup> |
| 75 | -0.17,0.26  | 2.06×10 <sup>7</sup> |
| 76 | 0.33,-0.03  | 2.05×10 <sup>7</sup> |
| 77 | -0.61,0.01  | 2.04×10 <sup>7</sup> |
| 78 | -0.79,-0.49 | 1.88×10 <sup>7</sup> |
| 79 | -0.71,-0.44 | 1.87×10 <sup>7</sup> |
| 80 | 0.14,0.03   | 1.84×10 <sup>7</sup> |
| 81 | -0.17,-0.48 | 1.71×10 <sup>7</sup> |
| 82 | 0.07,-0.03  | 1.63×10 <sup>7</sup> |
| 83 | 0.61,-0.37  | 1.63×10 <sup>7</sup> |

---

---

|           |             |                    |
|-----------|-------------|--------------------|
| <b>84</b> | 0.39,0.14   | $1.47 \times 10^7$ |
| <b>85</b> | 0.42,-0.09  | $1.41 \times 10^7$ |
| <b>86</b> | 0.61,0.15   | $1.30 \times 10^7$ |
| <b>87</b> | 0.05,-0.75  | $1.15 \times 10^7$ |
| <b>88</b> | -0.23,-0.92 | $1.13 \times 10^7$ |
| <b>89</b> | 0.42,0.15   | $1.10 \times 10^7$ |
| <b>90</b> | 0.27,0.67   | $9.95 \times 10^6$ |
| <b>91</b> | 0.43,0.73   | $9.43 \times 10^6$ |
| <b>92</b> | -0.47,0.03  | $7.20 \times 10^6$ |
| <b>93</b> | 0.93,0.14   | $7.16 \times 10^6$ |
| <b>94</b> | 0.21,0.73   | $6.77 \times 10^6$ |
| <b>95</b> | -0.28,-0.88 | $5.90 \times 10^6$ |
| <b>96</b> | 0.26,0.72   | $5.87 \times 10^6$ |

---

**Table S3.** Volume, locations and compositions of the selected catalyst units

| Catalyst entry | Volume $\mu\text{m}^3$ | Coordinates (X,Y)* | CMY values, %      |                    | Doping metals (atomic fractions)*                                                                                |
|----------------|------------------------|--------------------|--------------------|--------------------|------------------------------------------------------------------------------------------------------------------|
|                |                        |                    | (CMY) <sub>1</sub> | (CMY) <sub>2</sub> |                                                                                                                  |
| 1              | $8.65 \times 10^7$     | 0.18,-0.54         | 63,66,75           | 3,15,78            | Ni <sub>0.21</sub> Zn <sub>0.22</sub> Cd <sub>0.25</sub> Y <sub>0.01</sub> Co <sub>0.05</sub> In <sub>0.26</sub> |
| 2              | $7.60 \times 10^7$     | -0.09,-0.33        | 89,68,8            | 6,59,95            | Ni <sub>0.27</sub> Zn <sub>0.21</sub> Cd <sub>0.02</sub> Y <sub>0.02</sub> Co <sub>0.18</sub> In <sub>0.30</sub> |
| 3              | $7.25 \times 10^7$     | -0.33,0.02         | 2,73,67            | 84,16,30           | Ni <sub>0.01</sub> Zn <sub>0.27</sub> Cd <sub>0.25</sub> Y <sub>0.31</sub> Co <sub>0.06</sub> In <sub>0.10</sub> |
| 4              | $6.55 \times 10^7$     | 0.40,0.21          | 21,96,50           | 79,11,83           | Ni <sub>0.06</sub> Zn <sub>0.28</sub> Cd <sub>0.15</sub> Y <sub>0.23</sub> Co <sub>0.03</sub> In <sub>0.25</sub> |
| 5              | $6.39 \times 10^7$     | 0.52,-0.59         | 66,8,31            | 82,15,69           | Ni <sub>0.24</sub> Zn <sub>0.03</sub> Cd <sub>0.11</sub> Y <sub>0.30</sub> Co <sub>0.06</sub> In <sub>0.26</sub> |
| 6              | $5.98 \times 10^7$     | 0.08,-0.33         | 83,15,48           | 1,85,73            | Ni <sub>0.27</sub> Zn <sub>0.05</sub> Cd <sub>0.16</sub> Y <sub>0.00</sub> Co <sub>0.28</sub> In <sub>0.24</sub> |
| 7              | $5.96 \times 10^7$     | -0.21,-0.08        | 8,56,22            | 42,1,44            | Ni <sub>0.05</sub> Zn <sub>0.32</sub> Cd <sub>0.13</sub> Y <sub>0.24</sub> Co <sub>0.01</sub> In <sub>0.25</sub> |
| 8              | $5.91 \times 10^7$     | -0.22,-0.30        | 80,92,4            | 33,22,92           | Ni <sub>0.25</sub> Zn <sub>0.28</sub> Cd <sub>0.01</sub> Y <sub>0.10</sub> Co <sub>0.07</sub> In <sub>0.29</sub> |
| 9              | $5.50 \times 10^7$     | 0.76,-0.37         | 96,98,7            | 25,26,1            | Ni <sub>0.38</sub> Zn <sub>0.39</sub> Cd <sub>0.03</sub> Y <sub>0.09</sub> Co <sub>0.10</sub> In <sub>0.01</sub> |
| 10             | $0.59 \times 10^7$     | 0.26,0.72          | 60,54,2            | 87,79,19           | Ni <sub>0.20</sub> Zn <sub>0.18</sub> Cd <sub>0.01</sub> Y <sub>0.29</sub> Co <sub>0.26</sub> In <sub>0.06</sub> |

\* Red letters for metals of atomic fractions > 0.2, blue for < 0.1.

**Table S4.** The CMY values and components of catalysts in reaction units

Note: The number 1-1260 is from Fig. S5.

| No. | CMY values(%)  |                |                |                |                |                | $R_{atom}$ |      |      |      |      |      |
|-----|----------------|----------------|----------------|----------------|----------------|----------------|------------|------|------|------|------|------|
|     | C <sub>1</sub> | M <sub>1</sub> | Y <sub>1</sub> | C <sub>2</sub> | M <sub>2</sub> | Y <sub>2</sub> | Ni         | Zn   | Cd   | Y    | Co   | In   |
| 1   | 1              | 3              | 28             | 1              | 5              | 64             | 0.01       | 0.03 | 0.27 | 0.01 | 0.05 | 0.63 |
| 2   | 1              | 3              | 28             | 1              | 5              | 64             | 0.01       | 0.03 | 0.27 | 0.01 | 0.05 | 0.63 |
| 3   | 1              | 2              | 40             | 1              | 3              | 51             | 0.01       | 0.02 | 0.41 | 0.01 | 0.03 | 0.52 |
| 4   | 1              | 4              | 53             | 1              | 2              | 39             | 0.01       | 0.04 | 0.53 | 0.01 | 0.02 | 0.39 |
| 5   | 1              | 31             | 67             | 1              | 3              | 28             | 0.01       | 0.24 | 0.51 | 0.01 | 0.02 | 0.21 |
| 6   | 1              | 86             | 79             | 2              | 3              | 20             | 0.01       | 0.45 | 0.41 | 0.01 | 0.02 | 0.10 |
| 7   | 2              | 96             | 90             | 2              | 3              | 14             | 0.01       | 0.46 | 0.43 | 0.01 | 0.01 | 0.07 |
| 8   | 2              | 97             | 95             | 1              | 3              | 9              | 0.01       | 0.47 | 0.46 | 0.00 | 0.01 | 0.04 |
| 9   | 2              | 96             | 96             | 2              | 9              | 5              | 0.01       | 0.46 | 0.46 | 0.01 | 0.04 | 0.02 |
| 10  | 2              | 90             | 95             | 2              | 15             | 2              | 0.01       | 0.44 | 0.46 | 0.01 | 0.07 | 0.01 |
| 11  | 1              | 80             | 93             | 3              | 22             | 1              | 0.01       | 0.40 | 0.47 | 0.02 | 0.11 | 0.01 |
| 12  | 1              | 68             | 53             | 5              | 31             | 1              | 0.01       | 0.43 | 0.33 | 0.03 | 0.19 | 0.01 |
| 13  | 1              | 54             | 7              | 5              | 41             | 1              | 0.01       | 0.50 | 0.06 | 0.05 | 0.38 | 0.01 |
| 14  | 5              | 39             | 2              | 3              | 53             | 2              | 0.05       | 0.38 | 0.02 | 0.03 | 0.51 | 0.02 |
| 15  | 3              | 27             | 2              | 35             | 66             | 1              | 0.02       | 0.20 | 0.01 | 0.26 | 0.49 | 0.01 |
| 16  | 2              | 2              | 9              | 80             | 13             | 80             | 0.01       | 0.01 | 0.05 | 0.43 | 0.07 | 0.43 |
| 17  | 2              | 3              | 18             | 69             | 1              | 78             | 0.01       | 0.02 | 0.11 | 0.40 | 0.01 | 0.46 |
| 18  | 1              | 2              | 31             | 46             | 0              | 70             | 0.01       | 0.01 | 0.21 | 0.31 | 0.00 | 0.47 |
| 19  | 2              | 5              | 47             | 33             | 1              | 61             | 0.01       | 0.03 | 0.32 | 0.22 | 0.01 | 0.41 |
| 20  | 4              | 41             | 60             | 22             | 1              | 53             | 0.02       | 0.23 | 0.33 | 0.12 | 0.01 | 0.29 |
| 21  | 1              | 72             | 76             | 12             | 2              | 44             | 0.00       | 0.35 | 0.37 | 0.06 | 0.01 | 0.21 |
| 22  | 1              | 82             | 87             | 4              | 3              | 35             | 0.00       | 0.39 | 0.41 | 0.02 | 0.01 | 0.17 |
| 23  | 1              | 92             | 93             | 1              | 8              | 27             | 0.00       | 0.41 | 0.42 | 0.00 | 0.04 | 0.12 |
| 24  | 2              | 96             | 96             | 2              | 13             | 20             | 0.01       | 0.42 | 0.42 | 0.01 | 0.06 | 0.09 |
| 25  | 1              | 96             | 93             | 2              | 21             | 13             | 0.00       | 0.42 | 0.41 | 0.01 | 0.09 | 0.06 |
| 26  | 1              | 87             | 85             | 6              | 30             | 6              | 0.00       | 0.40 | 0.40 | 0.03 | 0.14 | 0.03 |
| 27  | 1              | 75             | 77             | 16             | 39             | 2              | 0.00       | 0.36 | 0.37 | 0.08 | 0.19 | 0.01 |
| 28  | 1              | 61             | 56             | 30             | 47             | 1              | 0.01       | 0.31 | 0.29 | 0.15 | 0.24 | 0.01 |
| 29  | 1              | 47             | 21             | 46             | 55             | 1              | 0.01       | 0.27 | 0.12 | 0.27 | 0.32 | 0.01 |
| 30  | 2              | 31             | 2              | 61             | 63             | 1              | 0.01       | 0.19 | 0.01 | 0.38 | 0.39 | 0.01 |
| 31  | 2              | 19             | 2              | 84             | 69             | 2              | 0.01       | 0.11 | 0.01 | 0.47 | 0.39 | 0.01 |
| 32  | 1              | 10             | 2              | 100            | 77             | 4              | 0.01       | 0.05 | 0.01 | 0.52 | 0.40 | 0.02 |
| 33  | 1              | 1              | 2              | 100            | 83             | 8              | 0.01       | 0.01 | 0.01 | 0.51 | 0.43 | 0.04 |
| 34  | 1              | 2              | 5              | 78             | 12             | 93             | 0.01       | 0.01 | 0.03 | 0.41 | 0.06 | 0.49 |
| 35  | 2              | 3              | 12             | 79             | 13             | 89             | 0.01       | 0.02 | 0.06 | 0.40 | 0.07 | 0.45 |
| 36  | 1              | 3              | 25             | 79             | 12             | 86             | 0.00       | 0.01 | 0.12 | 0.38 | 0.06 | 0.42 |
| 37  | 1              | 9              | 41             | 79             | 10             | 83             | 0.00       | 0.04 | 0.18 | 0.35 | 0.04 | 0.37 |
| 38  | 1              | 30             | 56             | 76             | 5              | 81             | 0.00       | 0.12 | 0.22 | 0.31 | 0.02 | 0.33 |

|    |    |    |    |     |    |    |      |      |      |      |      |      |
|----|----|----|----|-----|----|----|------|------|------|------|------|------|
| 39 | 2  | 47 | 69 | 57  | 3  | 75 | 0.01 | 0.19 | 0.27 | 0.23 | 0.01 | 0.30 |
| 40 | 2  | 60 | 82 | 38  | 3  | 69 | 0.01 | 0.24 | 0.32 | 0.15 | 0.01 | 0.27 |
| 41 | 1  | 74 | 91 | 20  | 6  | 60 | 0.00 | 0.29 | 0.36 | 0.08 | 0.02 | 0.24 |
| 42 | 2  | 86 | 96 | 6   | 12 | 51 | 0.01 | 0.34 | 0.38 | 0.02 | 0.05 | 0.20 |
| 43 | 2  | 94 | 96 | 1   | 19 | 42 | 0.01 | 0.37 | 0.38 | 0.00 | 0.07 | 0.17 |
| 44 | 2  | 97 | 96 | 1   | 27 | 33 | 0.01 | 0.38 | 0.38 | 0.00 | 0.11 | 0.13 |
| 45 | 2  | 97 | 89 | 2   | 36 | 25 | 0.01 | 0.39 | 0.35 | 0.01 | 0.14 | 0.10 |
| 46 | 2  | 93 | 79 | 8   | 45 | 16 | 0.01 | 0.38 | 0.33 | 0.03 | 0.19 | 0.07 |
| 47 | 2  | 93 | 66 | 21  | 53 | 9  | 0.01 | 0.38 | 0.27 | 0.09 | 0.22 | 0.04 |
| 48 | 2  | 71 | 52 | 39  | 62 | 4  | 0.01 | 0.31 | 0.23 | 0.17 | 0.27 | 0.02 |
| 49 | 2  | 56 | 39 | 59  | 70 | 1  | 0.01 | 0.25 | 0.17 | 0.26 | 0.31 | 0.00 |
| 50 | 3  | 41 | 20 | 79  | 76 | 1  | 0.01 | 0.19 | 0.09 | 0.36 | 0.35 | 0.00 |
| 51 | 2  | 27 | 4  | 95  | 81 | 0  | 0.01 | 0.13 | 0.02 | 0.45 | 0.39 | 0.00 |
| 52 | 3  | 14 | 2  | 100 | 84 | 4  | 0.01 | 0.07 | 0.01 | 0.48 | 0.41 | 0.02 |
| 53 | 3  | 4  | 2  | 100 | 86 | 8  | 0.01 | 0.02 | 0.01 | 0.49 | 0.42 | 0.04 |
| 54 | 5  | 2  | 2  | 100 | 89 | 6  | 0.02 | 0.01 | 0.01 | 0.49 | 0.44 | 0.03 |
| 55 | 9  | 3  | 2  | 95  | 95 | 1  | 0.04 | 0.01 | 0.01 | 0.46 | 0.46 | 0.00 |
| 56 | 7  | 2  | 3  | 76  | 9  | 95 | 0.04 | 0.01 | 0.02 | 0.40 | 0.05 | 0.49 |
| 57 | 7  | 2  | 10 | 78  | 12 | 93 | 0.03 | 0.01 | 0.05 | 0.39 | 0.06 | 0.46 |
| 58 | 8  | 1  | 21 | 79  | 13 | 92 | 0.04 | 0.00 | 0.10 | 0.37 | 0.06 | 0.43 |
| 59 | 8  | 2  | 34 | 79  | 12 | 91 | 0.04 | 0.01 | 0.15 | 0.35 | 0.05 | 0.40 |
| 60 | 8  | 11 | 48 | 78  | 9  | 91 | 0.03 | 0.04 | 0.20 | 0.32 | 0.04 | 0.37 |
| 61 | 8  | 22 | 62 | 73  | 4  | 90 | 0.03 | 0.08 | 0.24 | 0.28 | 0.02 | 0.35 |
| 62 | 8  | 37 | 75 | 53  | 6  | 86 | 0.03 | 0.14 | 0.28 | 0.20 | 0.02 | 0.32 |
| 63 | 8  | 51 | 87 | 33  | 10 | 80 | 0.03 | 0.19 | 0.32 | 0.12 | 0.04 | 0.30 |
| 64 | 8  | 67 | 94 | 16  | 16 | 73 | 0.03 | 0.24 | 0.34 | 0.06 | 0.06 | 0.27 |
| 65 | 8  | 80 | 96 | 5   | 26 | 66 | 0.03 | 0.28 | 0.34 | 0.02 | 0.09 | 0.23 |
| 66 | 9  | 92 | 96 | 1   | 33 | 58 | 0.03 | 0.32 | 0.33 | 0.00 | 0.11 | 0.20 |
| 67 | 9  | 97 | 91 | 1   | 42 | 49 | 0.03 | 0.34 | 0.31 | 0.00 | 0.15 | 0.17 |
| 68 | 10 | 98 | 83 | 1   | 52 | 40 | 0.04 | 0.35 | 0.29 | 0.00 | 0.18 | 0.14 |
| 69 | 9  | 96 | 71 | 6   | 61 | 30 | 0.03 | 0.35 | 0.26 | 0.02 | 0.22 | 0.11 |
| 70 | 10 | 89 | 57 | 16  | 68 | 19 | 0.04 | 0.34 | 0.22 | 0.06 | 0.26 | 0.07 |
| 71 | 10 | 78 | 41 | 33  | 75 | 10 | 0.04 | 0.32 | 0.17 | 0.13 | 0.30 | 0.04 |
| 72 | 10 | 65 | 26 | 54  | 81 | 7  | 0.04 | 0.27 | 0.11 | 0.22 | 0.33 | 0.03 |
| 73 | 10 | 50 | 15 | 74  | 86 | 3  | 0.04 | 0.21 | 0.06 | 0.31 | 0.36 | 0.01 |
| 74 | 11 | 36 | 7  | 92  | 89 | 0  | 0.05 | 0.15 | 0.03 | 0.39 | 0.38 | 0.00 |
| 75 | 13 | 22 | 2  | 100 | 89 | 4  | 0.06 | 0.10 | 0.01 | 0.43 | 0.39 | 0.02 |
| 76 | 13 | 10 | 2  | 100 | 89 | 8  | 0.06 | 0.05 | 0.01 | 0.45 | 0.40 | 0.04 |
| 77 | 11 | 3  | 2  | 100 | 89 | 6  | 0.05 | 0.01 | 0.01 | 0.47 | 0.42 | 0.03 |
| 78 | 14 | 2  | 1  | 96  | 93 | 1  | 0.07 | 0.01 | 0.00 | 0.46 | 0.45 | 0.00 |
| 79 | 31 | 2  | 1  | 92  | 63 | 0  | 0.16 | 0.01 | 0.01 | 0.49 | 0.33 | 0.00 |
| 80 | 21 | 2  | 2  | 55  | 4  | 1  | 0.25 | 0.02 | 0.02 | 0.65 | 0.05 | 0.01 |
| 81 | 20 | 1  | 2  | 75  | 1  | 44 | 0.14 | 0.01 | 0.01 | 0.52 | 0.01 | 0.31 |
| 82 | 22 | 1  | 7  | 77  | 9  | 93 | 0.11 | 0.00 | 0.03 | 0.37 | 0.04 | 0.44 |

---

|     |    |    |    |     |    |    |      |      |      |      |      |      |
|-----|----|----|----|-----|----|----|------|------|------|------|------|------|
| 83  | 21 | 1  | 16 | 79  | 12 | 90 | 0.10 | 0.00 | 0.07 | 0.36 | 0.05 | 0.41 |
| 84  | 21 | 2  | 28 | 79  | 13 | 91 | 0.09 | 0.01 | 0.12 | 0.34 | 0.06 | 0.39 |
| 85  | 22 | 1  | 41 | 79  | 13 | 92 | 0.09 | 0.00 | 0.17 | 0.32 | 0.05 | 0.37 |
| 86  | 22 | 3  | 56 | 78  | 11 | 94 | 0.08 | 0.01 | 0.21 | 0.30 | 0.04 | 0.36 |
| 87  | 21 | 12 | 69 | 73  | 9  | 95 | 0.08 | 0.04 | 0.25 | 0.26 | 0.03 | 0.34 |
| 88  | 18 | 24 | 80 | 51  | 14 | 92 | 0.06 | 0.09 | 0.29 | 0.18 | 0.05 | 0.33 |
| 89  | 18 | 39 | 90 | 28  | 18 | 88 | 0.06 | 0.14 | 0.32 | 0.10 | 0.06 | 0.31 |
| 90  | 18 | 55 | 95 | 14  | 30 | 85 | 0.06 | 0.19 | 0.32 | 0.05 | 0.10 | 0.29 |
| 91  | 18 | 70 | 94 | 5   | 40 | 80 | 0.06 | 0.23 | 0.31 | 0.02 | 0.13 | 0.26 |
| 92  | 19 | 83 | 92 | 1   | 48 | 74 | 0.06 | 0.26 | 0.29 | 0.00 | 0.15 | 0.23 |
| 93  | 19 | 93 | 84 | 1   | 57 | 66 | 0.06 | 0.29 | 0.26 | 0.00 | 0.18 | 0.21 |
| 94  | 19 | 97 | 72 | 1   | 65 | 58 | 0.06 | 0.31 | 0.23 | 0.00 | 0.21 | 0.19 |
| 95  | 20 | 98 | 59 | 5   | 75 | 47 | 0.07 | 0.32 | 0.19 | 0.02 | 0.25 | 0.15 |
| 96  | 19 | 94 | 43 | 15  | 80 | 36 | 0.07 | 0.33 | 0.15 | 0.05 | 0.28 | 0.13 |
| 97  | 20 | 94 | 29 | 27  | 84 | 20 | 0.07 | 0.34 | 0.11 | 0.10 | 0.31 | 0.07 |
| 98  | 21 | 72 | 16 | 49  | 89 | 14 | 0.08 | 0.28 | 0.06 | 0.19 | 0.34 | 0.05 |
| 99  | 24 | 59 | 8  | 71  | 92 | 9  | 0.09 | 0.22 | 0.03 | 0.27 | 0.35 | 0.03 |
| 100 | 26 | 45 | 3  | 90  | 93 | 5  | 0.10 | 0.17 | 0.01 | 0.34 | 0.35 | 0.02 |
| 101 | 27 | 30 | 2  | 99  | 91 | 6  | 0.11 | 0.12 | 0.01 | 0.39 | 0.36 | 0.02 |
| 102 | 27 | 17 | 4  | 100 | 87 | 9  | 0.11 | 0.07 | 0.02 | 0.41 | 0.36 | 0.04 |
| 103 | 28 | 6  | 7  | 100 | 85 | 7  | 0.12 | 0.03 | 0.03 | 0.43 | 0.36 | 0.03 |
| 104 | 27 | 1  | 4  | 97  | 85 | 1  | 0.13 | 0.00 | 0.02 | 0.45 | 0.40 | 0.00 |
| 105 | 28 | 3  | 0  | 86  | 76 | 1  | 0.14 | 0.02 | 0.00 | 0.44 | 0.39 | 0.01 |
| 106 | 38 | 3  | 1  | 68  | 12 | 2  | 0.31 | 0.02 | 0.01 | 0.55 | 0.10 | 0.02 |
| 107 | 42 | 3  | 1  | 44  | 0  | 1  | 0.46 | 0.03 | 0.01 | 0.48 | 0.00 | 0.01 |
| 108 | 35 | 2  | 2  | 39  | 2  | 1  | 0.43 | 0.02 | 0.02 | 0.48 | 0.02 | 0.01 |
| 109 | 36 | 4  | 2  | 56  | 1  | 7  | 0.34 | 0.04 | 0.02 | 0.53 | 0.01 | 0.07 |
| 110 | 37 | 13 | 3  | 72  | 2  | 72 | 0.19 | 0.07 | 0.02 | 0.36 | 0.01 | 0.36 |
| 111 | 37 | 11 | 11 | 78  | 7  | 83 | 0.16 | 0.05 | 0.05 | 0.34 | 0.03 | 0.37 |
| 112 | 38 | 2  | 22 | 79  | 11 | 84 | 0.16 | 0.01 | 0.09 | 0.33 | 0.05 | 0.36 |
| 113 | 38 | 1  | 35 | 79  | 13 | 87 | 0.15 | 0.00 | 0.14 | 0.31 | 0.05 | 0.34 |
| 114 | 38 | 1  | 49 | 79  | 14 | 90 | 0.14 | 0.00 | 0.18 | 0.29 | 0.05 | 0.33 |
| 115 | 38 | 2  | 63 | 79  | 15 | 93 | 0.13 | 0.01 | 0.22 | 0.27 | 0.05 | 0.32 |
| 116 | 38 | 7  | 76 | 72  | 16 | 96 | 0.12 | 0.02 | 0.25 | 0.24 | 0.05 | 0.31 |
| 117 | 35 | 15 | 86 | 45  | 19 | 93 | 0.12 | 0.05 | 0.29 | 0.15 | 0.06 | 0.32 |
| 118 | 31 | 24 | 91 | 25  | 30 | 93 | 0.11 | 0.08 | 0.31 | 0.09 | 0.10 | 0.32 |
| 119 | 26 | 38 | 92 | 14  | 45 | 94 | 0.08 | 0.12 | 0.30 | 0.05 | 0.15 | 0.30 |
| 120 | 24 | 54 | 89 | 4   | 56 | 92 | 0.08 | 0.17 | 0.28 | 0.01 | 0.18 | 0.29 |
| 121 | 24 | 71 | 81 | 1   | 63 | 88 | 0.07 | 0.22 | 0.25 | 0.00 | 0.19 | 0.27 |
| 122 | 25 | 84 | 69 | 1   | 71 | 82 | 0.08 | 0.25 | 0.21 | 0.00 | 0.21 | 0.25 |
| 123 | 26 | 93 | 56 | 1   | 78 | 75 | 0.08 | 0.28 | 0.17 | 0.00 | 0.24 | 0.23 |
| 124 | 26 | 96 | 39 | 4   | 85 | 65 | 0.08 | 0.30 | 0.12 | 0.01 | 0.27 | 0.21 |
| 125 | 31 | 96 | 26 | 14  | 90 | 55 | 0.10 | 0.31 | 0.08 | 0.04 | 0.29 | 0.18 |
| 126 | 35 | 90 | 18 | 23  | 92 | 36 | 0.12 | 0.31 | 0.06 | 0.08 | 0.31 | 0.12 |

---



---

|     |    |    |    |     |    |    |      |      |      |      |      |      |
|-----|----|----|----|-----|----|----|------|------|------|------|------|------|
| 127 | 39 | 88 | 14 | 42  | 93 | 22 | 0.13 | 0.30 | 0.05 | 0.14 | 0.31 | 0.07 |
| 128 | 39 | 80 | 10 | 67  | 94 | 19 | 0.13 | 0.26 | 0.03 | 0.22 | 0.30 | 0.06 |
| 129 | 41 | 68 | 4  | 88  | 92 | 14 | 0.13 | 0.22 | 0.01 | 0.29 | 0.30 | 0.05 |
| 130 | 42 | 53 | 2  | 99  | 89 | 10 | 0.14 | 0.18 | 0.01 | 0.34 | 0.30 | 0.03 |
| 131 | 43 | 39 | 2  | 100 | 82 | 13 | 0.15 | 0.14 | 0.01 | 0.36 | 0.29 | 0.05 |
| 132 | 43 | 24 | 5  | 100 | 79 | 10 | 0.16 | 0.09 | 0.02 | 0.38 | 0.30 | 0.04 |
| 133 | 43 | 11 | 15 | 78  | 74 | 2  | 0.19 | 0.05 | 0.07 | 0.35 | 0.33 | 0.01 |
| 134 | 44 | 3  | 26 | 85  | 70 | 2  | 0.19 | 0.01 | 0.11 | 0.37 | 0.30 | 0.01 |
| 135 | 44 | 1  | 24 | 66  | 44 | 1  | 0.24 | 0.01 | 0.13 | 0.37 | 0.24 | 0.01 |
| 136 | 45 | 1  | 6  | 45  | 0  | 1  | 0.46 | 0.01 | 0.06 | 0.46 | 0.00 | 0.01 |
| 137 | 50 | 6  | 1  | 29  | 1  | 2  | 0.56 | 0.07 | 0.01 | 0.33 | 0.01 | 0.02 |
| 138 | 51 | 1  | 2  | 29  | 1  | 2  | 0.59 | 0.01 | 0.02 | 0.34 | 0.01 | 0.02 |
| 139 | 51 | 2  | 2  | 36  | 3  | 1  | 0.54 | 0.02 | 0.02 | 0.38 | 0.03 | 0.01 |
| 140 | 54 | 23 | 3  | 55  | 1  | 31 | 0.32 | 0.14 | 0.02 | 0.33 | 0.01 | 0.19 |
| 141 | 54 | 41 | 2  | 72  | 2  | 68 | 0.23 | 0.17 | 0.01 | 0.30 | 0.01 | 0.28 |
| 142 | 53 | 32 | 6  | 79  | 7  | 70 | 0.21 | 0.13 | 0.02 | 0.32 | 0.03 | 0.28 |
| 143 | 53 | 15 | 16 | 80  | 12 | 74 | 0.21 | 0.06 | 0.06 | 0.32 | 0.05 | 0.30 |
| 144 | 55 | 5  | 29 | 81  | 16 | 79 | 0.21 | 0.02 | 0.11 | 0.31 | 0.06 | 0.30 |
| 145 | 55 | 2  | 43 | 81  | 18 | 83 | 0.20 | 0.01 | 0.15 | 0.29 | 0.06 | 0.29 |
| 146 | 55 | 1  | 57 | 81  | 19 | 88 | 0.18 | 0.00 | 0.19 | 0.27 | 0.06 | 0.29 |
| 147 | 56 | 1  | 71 | 70  | 21 | 91 | 0.18 | 0.00 | 0.23 | 0.23 | 0.07 | 0.29 |
| 148 | 56 | 2  | 83 | 39  | 28 | 90 | 0.19 | 0.01 | 0.28 | 0.13 | 0.09 | 0.30 |
| 149 | 55 | 11 | 92 | 22  | 44 | 95 | 0.17 | 0.03 | 0.29 | 0.07 | 0.14 | 0.30 |
| 150 | 51 | 18 | 95 | 14  | 61 | 97 | 0.15 | 0.05 | 0.28 | 0.04 | 0.18 | 0.29 |
| 151 | 44 | 23 | 92 | 5   | 69 | 99 | 0.13 | 0.07 | 0.28 | 0.02 | 0.21 | 0.30 |
| 152 | 39 | 37 | 83 | 1   | 75 | 96 | 0.12 | 0.11 | 0.25 | 0.00 | 0.23 | 0.29 |
| 153 | 33 | 53 | 70 | 1   | 82 | 94 | 0.10 | 0.16 | 0.21 | 0.00 | 0.25 | 0.28 |
| 154 | 29 | 69 | 50 | 0   | 87 | 90 | 0.09 | 0.21 | 0.15 | 0.00 | 0.27 | 0.28 |
| 155 | 31 | 84 | 29 | 3   | 92 | 83 | 0.10 | 0.26 | 0.09 | 0.01 | 0.29 | 0.26 |
| 156 | 43 | 94 | 25 | 13  | 96 | 72 | 0.13 | 0.27 | 0.07 | 0.04 | 0.28 | 0.21 |
| 157 | 53 | 97 | 21 | 22  | 95 | 55 | 0.15 | 0.28 | 0.06 | 0.06 | 0.28 | 0.16 |
| 158 | 57 | 96 | 15 | 31  | 92 | 30 | 0.18 | 0.30 | 0.05 | 0.10 | 0.29 | 0.09 |
| 159 | 59 | 87 | 8  | 58  | 88 | 22 | 0.18 | 0.27 | 0.02 | 0.18 | 0.27 | 0.07 |
| 160 | 60 | 76 | 2  | 83  | 84 | 20 | 0.18 | 0.23 | 0.01 | 0.26 | 0.26 | 0.06 |
| 161 | 60 | 63 | 1  | 98  | 79 | 17 | 0.19 | 0.20 | 0.00 | 0.31 | 0.25 | 0.05 |
| 162 | 60 | 47 | 3  | 100 | 72 | 15 | 0.20 | 0.16 | 0.01 | 0.34 | 0.24 | 0.05 |
| 163 | 59 | 31 | 8  | 99  | 68 | 11 | 0.21 | 0.11 | 0.03 | 0.36 | 0.25 | 0.04 |
| 164 | 59 | 16 | 18 | 98  | 61 | 6  | 0.23 | 0.06 | 0.07 | 0.38 | 0.24 | 0.02 |
| 165 | 61 | 7  | 33 | 86  | 53 | 3  | 0.25 | 0.03 | 0.14 | 0.35 | 0.22 | 0.01 |
| 166 | 61 | 2  | 49 | 66  | 46 | 1  | 0.27 | 0.01 | 0.22 | 0.29 | 0.20 | 0.00 |
| 167 | 62 | 1  | 58 | 47  | 12 | 1  | 0.34 | 0.01 | 0.32 | 0.26 | 0.07 | 0.01 |
| 168 | 65 | 1  | 25 | 26  | 1  | 2  | 0.54 | 0.01 | 0.21 | 0.22 | 0.01 | 0.02 |
| 169 | 72 | 18 | 1  | 20  | 1  | 2  | 0.63 | 0.16 | 0.01 | 0.18 | 0.01 | 0.02 |
| 170 | 73 | 61 | 1  | 20  | 2  | 2  | 0.46 | 0.38 | 0.01 | 0.13 | 0.01 | 0.01 |

---

---

|     |    |    |    |    |    |    |      |      |      |      |      |      |
|-----|----|----|----|----|----|----|------|------|------|------|------|------|
| 171 | 70 | 70 | 3  | 35 | 1  | 5  | 0.38 | 0.38 | 0.02 | 0.19 | 0.01 | 0.03 |
| 172 | 70 | 55 | 4  | 53 | 1  | 39 | 0.32 | 0.25 | 0.02 | 0.24 | 0.00 | 0.18 |
| 173 | 68 | 36 | 8  | 73 | 2  | 50 | 0.29 | 0.15 | 0.03 | 0.31 | 0.01 | 0.21 |
| 174 | 67 | 20 | 18 | 81 | 10 | 56 | 0.27 | 0.08 | 0.07 | 0.32 | 0.04 | 0.22 |
| 175 | 70 | 11 | 35 | 83 | 16 | 60 | 0.25 | 0.04 | 0.13 | 0.30 | 0.06 | 0.22 |
| 176 | 73 | 3  | 51 | 84 | 20 | 66 | 0.25 | 0.01 | 0.17 | 0.28 | 0.07 | 0.22 |
| 177 | 73 | 1  | 65 | 84 | 22 | 71 | 0.23 | 0.00 | 0.21 | 0.27 | 0.07 | 0.22 |
| 178 | 72 | 1  | 78 | 83 | 23 | 77 | 0.22 | 0.00 | 0.23 | 0.25 | 0.07 | 0.23 |
| 179 | 72 | 1  | 88 | 63 | 23 | 78 | 0.22 | 0.00 | 0.27 | 0.19 | 0.07 | 0.24 |
| 180 | 73 | 5  | 96 | 36 | 41 | 83 | 0.22 | 0.01 | 0.29 | 0.11 | 0.12 | 0.25 |
| 181 | 73 | 15 | 97 | 23 | 61 | 93 | 0.20 | 0.04 | 0.27 | 0.06 | 0.17 | 0.26 |
| 182 | 70 | 21 | 94 | 15 | 74 | 99 | 0.19 | 0.06 | 0.25 | 0.04 | 0.20 | 0.27 |
| 183 | 60 | 23 | 81 | 5  | 79 | 99 | 0.17 | 0.07 | 0.23 | 0.01 | 0.23 | 0.29 |
| 184 | 54 | 37 | 62 | 1  | 83 | 99 | 0.16 | 0.11 | 0.18 | 0.00 | 0.25 | 0.29 |
| 185 | 50 | 56 | 41 | 1  | 88 | 98 | 0.15 | 0.17 | 0.12 | 0.00 | 0.26 | 0.29 |
| 186 | 51 | 73 | 20 | 0  | 92 | 97 | 0.15 | 0.22 | 0.06 | 0.00 | 0.28 | 0.29 |
| 187 | 67 | 92 | 23 | 2  | 97 | 95 | 0.18 | 0.24 | 0.06 | 0.01 | 0.26 | 0.25 |
| 188 | 73 | 97 | 19 | 12 | 97 | 86 | 0.19 | 0.25 | 0.05 | 0.03 | 0.25 | 0.22 |
| 189 | 74 | 98 | 12 | 22 | 95 | 72 | 0.20 | 0.26 | 0.03 | 0.06 | 0.25 | 0.19 |
| 190 | 76 | 94 | 4  | 27 | 86 | 48 | 0.23 | 0.28 | 0.01 | 0.08 | 0.26 | 0.14 |
| 191 | 76 | 83 | 2  | 41 | 73 | 23 | 0.26 | 0.28 | 0.01 | 0.14 | 0.24 | 0.08 |
| 192 | 76 | 71 | 2  | 69 | 61 | 18 | 0.26 | 0.24 | 0.01 | 0.23 | 0.21 | 0.06 |
| 193 | 75 | 55 | 5  | 91 | 49 | 18 | 0.26 | 0.19 | 0.02 | 0.31 | 0.17 | 0.06 |
| 194 | 73 | 37 | 10 | 97 | 49 | 26 | 0.25 | 0.13 | 0.03 | 0.33 | 0.17 | 0.09 |
| 195 | 73 | 20 | 22 | 94 | 47 | 14 | 0.27 | 0.07 | 0.08 | 0.35 | 0.17 | 0.05 |
| 196 | 77 | 12 | 40 | 92 | 39 | 12 | 0.28 | 0.04 | 0.15 | 0.34 | 0.14 | 0.04 |
| 197 | 77 | 4  | 54 | 85 | 31 | 9  | 0.30 | 0.02 | 0.21 | 0.33 | 0.12 | 0.03 |
| 198 | 76 | 2  | 69 | 65 | 27 | 6  | 0.31 | 0.01 | 0.28 | 0.27 | 0.11 | 0.02 |
| 199 | 75 | 2  | 83 | 47 | 18 | 4  | 0.33 | 0.01 | 0.36 | 0.21 | 0.08 | 0.02 |
| 200 | 75 | 3  | 92 | 27 | 1  | 3  | 0.37 | 0.01 | 0.46 | 0.13 | 0.00 | 0.01 |
| 201 | 94 | 70 | 0  | 12 | 2  | 2  | 0.52 | 0.39 | 0.00 | 0.07 | 0.01 | 0.01 |
| 202 | 88 | 93 | 2  | 8  | 2  | 2  | 0.45 | 0.48 | 0.01 | 0.04 | 0.01 | 0.01 |
| 203 | 84 | 90 | 4  | 18 | 2  | 1  | 0.42 | 0.45 | 0.02 | 0.09 | 0.01 | 0.01 |
| 204 | 85 | 96 | 3  | 36 | 1  | 12 | 0.36 | 0.41 | 0.01 | 0.15 | 0.00 | 0.05 |
| 205 | 84 | 62 | 6  | 54 | 2  | 27 | 0.36 | 0.26 | 0.03 | 0.23 | 0.01 | 0.11 |
| 206 | 81 | 42 | 11 | 75 | 7  | 34 | 0.32 | 0.17 | 0.04 | 0.30 | 0.03 | 0.14 |
| 207 | 81 | 23 | 23 | 84 | 15 | 39 | 0.31 | 0.09 | 0.09 | 0.32 | 0.06 | 0.15 |
| 208 | 83 | 16 | 42 | 85 | 20 | 43 | 0.29 | 0.06 | 0.15 | 0.29 | 0.07 | 0.15 |
| 209 | 81 | 10 | 58 | 86 | 23 | 48 | 0.26 | 0.03 | 0.19 | 0.28 | 0.08 | 0.16 |
| 210 | 78 | 5  | 70 | 86 | 24 | 54 | 0.25 | 0.02 | 0.22 | 0.27 | 0.08 | 0.17 |
| 211 | 77 | 5  | 82 | 84 | 25 | 60 | 0.23 | 0.02 | 0.25 | 0.25 | 0.08 | 0.18 |
| 212 | 76 | 6  | 92 | 57 | 35 | 61 | 0.23 | 0.02 | 0.28 | 0.17 | 0.11 | 0.19 |
| 213 | 76 | 8  | 96 | 31 | 55 | 69 | 0.23 | 0.02 | 0.29 | 0.09 | 0.16 | 0.21 |
| 214 | 78 | 12 | 97 | 23 | 74 | 87 | 0.21 | 0.03 | 0.26 | 0.06 | 0.20 | 0.23 |

---

---

|     |    |     |    |    |    |     |      |      |      |      |      |      |
|-----|----|-----|----|----|----|-----|------|------|------|------|------|------|
| 215 | 81 | 18  | 92 | 15 | 85 | 97  | 0.21 | 0.05 | 0.24 | 0.04 | 0.22 | 0.25 |
| 216 | 82 | 22  | 80 | 5  | 88 | 100 | 0.22 | 0.06 | 0.21 | 0.01 | 0.23 | 0.27 |
| 217 | 75 | 24  | 59 | 1  | 88 | 99  | 0.22 | 0.07 | 0.17 | 0.00 | 0.25 | 0.29 |
| 218 | 70 | 42  | 35 | 1  | 90 | 99  | 0.21 | 0.12 | 0.10 | 0.00 | 0.27 | 0.29 |
| 219 | 73 | 66  | 18 | 1  | 92 | 99  | 0.21 | 0.19 | 0.05 | 0.00 | 0.26 | 0.28 |
| 220 | 84 | 88  | 21 | 2  | 94 | 98  | 0.22 | 0.23 | 0.05 | 0.01 | 0.24 | 0.25 |
| 221 | 88 | 97  | 16 | 12 | 95 | 94  | 0.22 | 0.24 | 0.04 | 0.03 | 0.24 | 0.23 |
| 222 | 89 | 99  | 9  | 21 | 89 | 84  | 0.23 | 0.25 | 0.02 | 0.05 | 0.23 | 0.21 |
| 223 | 89 | 97  | 2  | 27 | 77 | 64  | 0.25 | 0.27 | 0.01 | 0.08 | 0.22 | 0.18 |
| 224 | 90 | 89  | 2  | 41 | 60 | 47  | 0.27 | 0.27 | 0.01 | 0.12 | 0.18 | 0.14 |
| 225 | 89 | 78  | 5  | 69 | 41 | 41  | 0.28 | 0.24 | 0.02 | 0.21 | 0.13 | 0.13 |
| 226 | 88 | 64  | 3  | 88 | 30 | 37  | 0.28 | 0.21 | 0.01 | 0.28 | 0.10 | 0.12 |
| 227 | 85 | 42  | 12 | 88 | 28 | 32  | 0.30 | 0.15 | 0.04 | 0.31 | 0.10 | 0.11 |
| 228 | 85 | 24  | 26 | 88 | 26 | 27  | 0.31 | 0.09 | 0.09 | 0.32 | 0.09 | 0.10 |
| 229 | 84 | 18  | 45 | 87 | 22 | 25  | 0.30 | 0.06 | 0.16 | 0.31 | 0.08 | 0.09 |
| 230 | 82 | 12  | 59 | 83 | 17 | 23  | 0.30 | 0.04 | 0.21 | 0.30 | 0.06 | 0.08 |
| 231 | 79 | 8   | 73 | 65 | 12 | 17  | 0.31 | 0.03 | 0.29 | 0.26 | 0.05 | 0.07 |
| 232 | 77 | 7   | 84 | 47 | 7  | 13  | 0.33 | 0.03 | 0.36 | 0.20 | 0.03 | 0.06 |
| 233 | 77 | 8   | 93 | 28 | 2  | 8   | 0.36 | 0.04 | 0.43 | 0.13 | 0.01 | 0.04 |
| 234 | 76 | 9   | 96 | 11 | 2  | 4   | 0.38 | 0.05 | 0.48 | 0.06 | 0.01 | 0.02 |
| 235 | 93 | 99  | 7  | 2  | 1  | 1   | 0.46 | 0.49 | 0.03 | 0.01 | 0.00 | 0.00 |
| 236 | 90 | 100 | 9  | 1  | 0  | 0   | 0.45 | 0.50 | 0.05 | 0.01 | 0.00 | 0.00 |
| 237 | 94 | 98  | 5  | 6  | 2  | 2   | 0.45 | 0.47 | 0.02 | 0.03 | 0.01 | 0.01 |
| 238 | 94 | 93  | 3  | 19 | 3  | 2   | 0.44 | 0.43 | 0.01 | 0.09 | 0.01 | 0.01 |
| 239 | 94 | 83  | 4  | 36 | 6  | 7   | 0.41 | 0.36 | 0.02 | 0.16 | 0.03 | 0.03 |
| 240 | 94 | 71  | 10 | 54 | 12 | 11  | 0.37 | 0.28 | 0.04 | 0.21 | 0.05 | 0.04 |
| 241 | 90 | 47  | 14 | 73 | 15 | 17  | 0.35 | 0.18 | 0.05 | 0.29 | 0.06 | 0.07 |
| 242 | 88 | 26  | 26 | 86 | 21 | 20  | 0.33 | 0.10 | 0.10 | 0.32 | 0.08 | 0.07 |
| 243 | 85 | 21  | 45 | 88 | 26 | 22  | 0.30 | 0.07 | 0.16 | 0.31 | 0.09 | 0.08 |
| 244 | 83 | 16  | 63 | 89 | 29 | 25  | 0.27 | 0.05 | 0.21 | 0.29 | 0.10 | 0.08 |
| 245 | 80 | 11  | 76 | 89 | 31 | 30  | 0.25 | 0.03 | 0.24 | 0.28 | 0.10 | 0.09 |
| 246 | 78 | 9   | 87 | 83 | 33 | 36  | 0.24 | 0.03 | 0.27 | 0.25 | 0.10 | 0.11 |
| 247 | 78 | 10  | 94 | 55 | 52 | 40  | 0.24 | 0.03 | 0.29 | 0.17 | 0.16 | 0.12 |
| 248 | 77 | 10  | 96 | 29 | 69 | 50  | 0.23 | 0.03 | 0.29 | 0.09 | 0.21 | 0.15 |
| 249 | 78 | 12  | 94 | 24 | 84 | 75  | 0.21 | 0.03 | 0.26 | 0.07 | 0.23 | 0.20 |
| 250 | 81 | 17  | 87 | 15 | 92 | 91  | 0.21 | 0.04 | 0.23 | 0.04 | 0.24 | 0.24 |
| 251 | 83 | 21  | 74 | 4  | 95 | 98  | 0.22 | 0.06 | 0.20 | 0.01 | 0.25 | 0.26 |
| 252 | 86 | 24  | 55 | 1  | 93 | 99  | 0.24 | 0.07 | 0.15 | 0.00 | 0.26 | 0.28 |
| 253 | 85 | 32  | 32 | 1  | 91 | 99  | 0.25 | 0.09 | 0.09 | 0.00 | 0.27 | 0.29 |
| 254 | 88 | 59  | 17 | 0  | 90 | 99  | 0.25 | 0.17 | 0.05 | 0.00 | 0.25 | 0.28 |
| 255 | 93 | 82  | 17 | 3  | 89 | 99  | 0.24 | 0.21 | 0.04 | 0.01 | 0.23 | 0.26 |
| 256 | 95 | 94  | 10 | 11 | 87 | 98  | 0.24 | 0.24 | 0.03 | 0.03 | 0.22 | 0.25 |
| 257 | 96 | 98  | 7  | 21 | 80 | 92  | 0.24 | 0.25 | 0.02 | 0.05 | 0.20 | 0.23 |
| 258 | 96 | 97  | 5  | 26 | 64 | 77  | 0.26 | 0.27 | 0.01 | 0.07 | 0.18 | 0.21 |

---

---

|     |    |    |    |    |    |     |      |      |      |      |      |      |
|-----|----|----|----|----|----|-----|------|------|------|------|------|------|
| 259 | 96 | 94 | 4  | 44 | 45 | 66  | 0.28 | 0.27 | 0.01 | 0.13 | 0.13 | 0.19 |
| 260 | 96 | 86 | 7  | 73 | 24 | 62  | 0.28 | 0.25 | 0.02 | 0.21 | 0.07 | 0.18 |
| 261 | 95 | 72 | 13 | 86 | 24 | 61  | 0.27 | 0.21 | 0.04 | 0.25 | 0.07 | 0.17 |
| 262 | 92 | 48 | 15 | 86 | 23 | 55  | 0.29 | 0.15 | 0.05 | 0.27 | 0.07 | 0.17 |
| 263 | 88 | 27 | 29 | 85 | 22 | 49  | 0.29 | 0.09 | 0.10 | 0.28 | 0.07 | 0.16 |
| 264 | 86 | 22 | 48 | 84 | 17 | 44  | 0.29 | 0.07 | 0.16 | 0.28 | 0.06 | 0.15 |
| 265 | 83 | 18 | 65 | 81 | 10 | 40  | 0.28 | 0.06 | 0.22 | 0.27 | 0.03 | 0.13 |
| 266 | 80 | 13 | 78 | 67 | 3  | 34  | 0.29 | 0.05 | 0.28 | 0.24 | 0.01 | 0.12 |
| 267 | 78 | 10 | 88 | 46 | 2  | 25  | 0.31 | 0.04 | 0.35 | 0.18 | 0.01 | 0.10 |
| 268 | 78 | 11 | 95 | 27 | 2  | 18  | 0.34 | 0.05 | 0.41 | 0.12 | 0.01 | 0.08 |
| 269 | 77 | 11 | 96 | 12 | 1  | 11  | 0.37 | 0.05 | 0.46 | 0.06 | 0.00 | 0.05 |
| 270 | 78 | 11 | 95 | 2  | 2  | 5   | 0.40 | 0.06 | 0.49 | 0.01 | 0.01 | 0.03 |
| 271 | 97 | 91 | 3  | 1  | 1  | 3   | 0.49 | 0.46 | 0.02 | 0.01 | 0.01 | 0.02 |
| 272 | 97 | 96 | 5  | 1  | 1  | 1   | 0.48 | 0.48 | 0.02 | 0.00 | 0.00 | 0.00 |
| 273 | 96 | 96 | 5  | 6  | 6  | 2   | 0.45 | 0.45 | 0.02 | 0.03 | 0.03 | 0.01 |
| 274 | 96 | 89 | 8  | 19 | 12 | 1   | 0.43 | 0.40 | 0.04 | 0.08 | 0.05 | 0.00 |
| 275 | 95 | 78 | 14 | 36 | 19 | 2   | 0.39 | 0.32 | 0.06 | 0.15 | 0.08 | 0.01 |
| 276 | 91 | 54 | 16 | 55 | 26 | 3   | 0.37 | 0.22 | 0.07 | 0.22 | 0.11 | 0.01 |
| 277 | 88 | 29 | 28 | 74 | 33 | 4   | 0.34 | 0.11 | 0.11 | 0.29 | 0.13 | 0.02 |
| 278 | 86 | 23 | 51 | 91 | 39 | 9   | 0.29 | 0.08 | 0.17 | 0.30 | 0.13 | 0.03 |
| 279 | 83 | 20 | 68 | 95 | 48 | 12  | 0.25 | 0.06 | 0.21 | 0.29 | 0.15 | 0.04 |
| 280 | 81 | 15 | 81 | 96 | 53 | 15  | 0.24 | 0.04 | 0.24 | 0.28 | 0.16 | 0.04 |
| 281 | 78 | 11 | 91 | 97 | 54 | 17  | 0.22 | 0.03 | 0.26 | 0.28 | 0.16 | 0.05 |
| 282 | 77 | 11 | 95 | 87 | 59 | 17  | 0.22 | 0.03 | 0.27 | 0.25 | 0.17 | 0.05 |
| 283 | 78 | 10 | 91 | 58 | 69 | 18  | 0.24 | 0.03 | 0.28 | 0.18 | 0.21 | 0.06 |
| 284 | 80 | 14 | 81 | 30 | 80 | 29  | 0.25 | 0.04 | 0.26 | 0.10 | 0.25 | 0.09 |
| 285 | 83 | 19 | 67 | 24 | 92 | 60  | 0.24 | 0.06 | 0.19 | 0.07 | 0.27 | 0.17 |
| 286 | 86 | 13 | 50 | 16 | 96 | 79  | 0.25 | 0.04 | 0.15 | 0.05 | 0.28 | 0.23 |
| 287 | 88 | 29 | 28 | 5  | 97 | 89  | 0.26 | 0.09 | 0.08 | 0.01 | 0.29 | 0.26 |
| 288 | 92 | 53 | 16 | 1  | 94 | 95  | 0.26 | 0.15 | 0.05 | 0.00 | 0.27 | 0.27 |
| 289 | 85 | 77 | 13 | 1  | 91 | 99  | 0.23 | 0.21 | 0.04 | 0.00 | 0.25 | 0.27 |
| 290 | 96 | 89 | 7  | 1  | 86 | 99  | 0.25 | 0.24 | 0.02 | 0.00 | 0.23 | 0.26 |
| 291 | 96 | 96 | 5  | 3  | 81 | 99  | 0.25 | 0.25 | 0.01 | 0.01 | 0.21 | 0.26 |
| 292 | 97 | 97 | 6  | 11 | 78 | 100 | 0.25 | 0.25 | 0.02 | 0.03 | 0.20 | 0.26 |
| 293 | 96 | 97 | 6  | 20 | 67 | 95  | 0.25 | 0.25 | 0.02 | 0.05 | 0.18 | 0.25 |
| 294 | 96 | 91 | 10 | 27 | 48 | 86  | 0.27 | 0.25 | 0.03 | 0.08 | 0.13 | 0.24 |
| 295 | 94 | 78 | 16 | 48 | 30 | 80  | 0.27 | 0.23 | 0.05 | 0.14 | 0.09 | 0.23 |
| 296 | 89 | 53 | 16 | 78 | 23 | 81  | 0.26 | 0.16 | 0.05 | 0.23 | 0.07 | 0.24 |
| 297 | 88 | 30 | 31 | 84 | 22 | 76  | 0.27 | 0.09 | 0.09 | 0.25 | 0.07 | 0.23 |
| 298 | 86 | 24 | 53 | 83 | 20 | 71  | 0.26 | 0.07 | 0.16 | 0.25 | 0.06 | 0.21 |
| 299 | 83 | 20 | 71 | 83 | 17 | 66  | 0.24 | 0.06 | 0.21 | 0.24 | 0.05 | 0.19 |
| 300 | 81 | 16 | 83 | 82 | 12 | 61  | 0.24 | 0.05 | 0.25 | 0.24 | 0.04 | 0.18 |
| 301 | 78 | 12 | 92 | 79 | 5  | 56  | 0.24 | 0.04 | 0.29 | 0.25 | 0.02 | 0.17 |
| 302 | 77 | 11 | 96 | 66 | 1  | 48  | 0.26 | 0.04 | 0.32 | 0.22 | 0.00 | 0.16 |

---

|     |    |    |    |     |    |    |      |      |      |      |      |      |
|-----|----|----|----|-----|----|----|------|------|------|------|------|------|
| 303 | 78 | 11 | 95 | 45  | 1  | 39 | 0.29 | 0.04 | 0.35 | 0.17 | 0.00 | 0.14 |
| 304 | 78 | 10 | 90 | 28  | 1  | 31 | 0.33 | 0.04 | 0.38 | 0.12 | 0.00 | 0.13 |
| 305 | 25 | 78 | 3  | 12  | 1  | 24 | 0.17 | 0.55 | 0.02 | 0.08 | 0.01 | 0.17 |
| 306 | 90 | 85 | 3  | 3   | 2  | 14 | 0.46 | 0.43 | 0.02 | 0.02 | 0.01 | 0.07 |
| 307 | 97 | 94 | 5  | 2   | 2  | 9  | 0.46 | 0.45 | 0.02 | 0.01 | 0.01 | 0.04 |
| 308 | 96 | 97 | 6  | 3   | 2  | 5  | 0.46 | 0.46 | 0.03 | 0.01 | 0.01 | 0.02 |
| 309 | 96 | 98 | 7  | 3   | 8  | 1  | 0.45 | 0.46 | 0.03 | 0.01 | 0.04 | 0.00 |
| 310 | 95 | 94 | 12 | 7   | 16 | 2  | 0.42 | 0.42 | 0.05 | 0.03 | 0.07 | 0.01 |
| 311 | 93 | 82 | 18 | 20  | 24 | 2  | 0.39 | 0.34 | 0.08 | 0.08 | 0.10 | 0.01 |
| 312 | 86 | 58 | 16 | 36  | 33 | 1  | 0.37 | 0.25 | 0.07 | 0.16 | 0.14 | 0.00 |
| 313 | 85 | 33 | 32 | 55  | 41 | 1  | 0.34 | 0.13 | 0.13 | 0.22 | 0.17 | 0.00 |
| 314 | 86 | 25 | 56 | 74  | 50 | 1  | 0.29 | 0.09 | 0.19 | 0.25 | 0.17 | 0.00 |
| 315 | 84 | 22 | 74 | 92  | 57 | 3  | 0.25 | 0.07 | 0.22 | 0.28 | 0.17 | 0.01 |
| 316 | 81 | 18 | 86 | 99  | 66 | 7  | 0.23 | 0.05 | 0.24 | 0.28 | 0.18 | 0.02 |
| 317 | 79 | 14 | 94 | 100 | 72 | 12 | 0.21 | 0.04 | 0.25 | 0.27 | 0.19 | 0.03 |
| 318 | 77 | 10 | 96 | 100 | 75 | 15 | 0.21 | 0.03 | 0.26 | 0.27 | 0.20 | 0.04 |
| 319 | 78 | 10 | 94 | 93  | 82 | 18 | 0.21 | 0.03 | 0.25 | 0.25 | 0.22 | 0.05 |
| 320 | 78 | 9  | 86 | 73  | 87 | 20 | 0.22 | 0.03 | 0.24 | 0.21 | 0.25 | 0.06 |
| 321 | 79 | 10 | 75 | 45  | 91 | 23 | 0.24 | 0.03 | 0.23 | 0.14 | 0.28 | 0.07 |
| 322 | 82 | 15 | 61 | 25  | 94 | 41 | 0.26 | 0.05 | 0.19 | 0.08 | 0.30 | 0.13 |
| 323 | 85 | 20 | 24 | 17  | 96 | 63 | 0.28 | 0.07 | 0.08 | 0.06 | 0.31 | 0.21 |
| 324 | 88 | 25 | 25 | 5   | 95 | 76 | 0.28 | 0.08 | 0.08 | 0.02 | 0.30 | 0.24 |
| 325 | 91 | 47 | 13 | 1   | 90 | 85 | 0.28 | 0.14 | 0.04 | 0.00 | 0.28 | 0.26 |
| 326 | 94 | 69 | 9  | 0   | 85 | 91 | 0.27 | 0.20 | 0.03 | 0.00 | 0.24 | 0.26 |
| 327 | 94 | 83 | 3  | 0   | 78 | 94 | 0.27 | 0.24 | 0.01 | 0.00 | 0.22 | 0.27 |
| 328 | 95 | 93 | 3  | 2   | 73 | 97 | 0.26 | 0.26 | 0.01 | 0.01 | 0.20 | 0.27 |
| 329 | 94 | 97 | 5  | 11  | 65 | 97 | 0.25 | 0.26 | 0.01 | 0.03 | 0.18 | 0.26 |
| 330 | 93 | 95 | 15 | 20  | 52 | 96 | 0.25 | 0.26 | 0.04 | 0.05 | 0.14 | 0.26 |
| 331 | 90 | 84 | 20 | 32  | 34 | 92 | 0.26 | 0.24 | 0.06 | 0.09 | 0.10 | 0.26 |
| 332 | 82 | 58 | 16 | 55  | 22 | 91 | 0.25 | 0.18 | 0.05 | 0.17 | 0.07 | 0.28 |
| 333 | 91 | 34 | 35 | 79  | 19 | 92 | 0.26 | 0.10 | 0.10 | 0.23 | 0.05 | 0.26 |
| 334 | 85 | 25 | 58 | 81  | 18 | 87 | 0.24 | 0.07 | 0.16 | 0.23 | 0.05 | 0.25 |
| 335 | 84 | 22 | 87 | 81  | 16 | 82 | 0.23 | 0.06 | 0.23 | 0.22 | 0.04 | 0.22 |
| 336 | 81 | 19 | 89 | 81  | 14 | 78 | 0.22 | 0.05 | 0.25 | 0.22 | 0.04 | 0.22 |
| 337 | 79 | 14 | 95 | 79  | 10 | 73 | 0.23 | 0.04 | 0.27 | 0.23 | 0.03 | 0.21 |
| 338 | 77 | 10 | 96 | 77  | 4  | 70 | 0.23 | 0.03 | 0.29 | 0.23 | 0.01 | 0.21 |
| 339 | 77 | 9  | 93 | 64  | 1  | 64 | 0.25 | 0.03 | 0.30 | 0.21 | 0.00 | 0.21 |
| 340 | 78 | 8  | 85 | 44  | 2  | 55 | 0.29 | 0.03 | 0.31 | 0.16 | 0.01 | 0.20 |
| 341 | 79 | 9  | 78 | 27  | 1  | 46 | 0.33 | 0.04 | 0.33 | 0.11 | 0.00 | 0.19 |
| 342 | 3  | 66 | 3  | 12  | 2  | 37 | 0.02 | 0.54 | 0.02 | 0.10 | 0.02 | 0.30 |
| 343 | 80 | 78 | 2  | 2   | 3  | 28 | 0.41 | 0.40 | 0.01 | 0.01 | 0.02 | 0.15 |
| 344 | 92 | 91 | 1  | 2   | 3  | 19 | 0.44 | 0.44 | 0.00 | 0.01 | 0.01 | 0.09 |
| 345 | 89 | 98 | 4  | 3   | 13 | 1  | 0.43 | 0.47 | 0.02 | 0.01 | 0.06 | 0.00 |
| 346 | 89 | 99 | 11 | 2   | 20 | 1  | 0.40 | 0.45 | 0.05 | 0.01 | 0.09 | 0.00 |

|     |    |    |    |     |    |    |      |      |      |      |      |      |
|-----|----|----|----|-----|----|----|------|------|------|------|------|------|
| 347 | 88 | 96 | 17 | 6   | 31 | 7  | 0.36 | 0.39 | 0.07 | 0.02 | 0.13 | 0.03 |
| 348 | 84 | 88 | 22 | 18  | 39 | 4  | 0.33 | 0.35 | 0.09 | 0.07 | 0.15 | 0.02 |
| 349 | 73 | 65 | 18 | 35  | 48 | 2  | 0.30 | 0.27 | 0.07 | 0.15 | 0.20 | 0.01 |
| 350 | 70 | 43 | 35 | 54  | 57 | 1  | 0.27 | 0.17 | 0.13 | 0.21 | 0.22 | 0.00 |
| 351 | 75 | 25 | 58 | 73  | 64 | 1  | 0.25 | 0.08 | 0.20 | 0.25 | 0.22 | 0.00 |
| 352 | 81 | 23 | 80 | 92  | 69 | 1  | 0.23 | 0.07 | 0.23 | 0.27 | 0.20 | 0.00 |
| 353 | 81 | 20 | 92 | 100 | 77 | 4  | 0.22 | 0.05 | 0.25 | 0.27 | 0.21 | 0.01 |
| 354 | 79 | 15 | 96 | 100 | 81 | 11 | 0.21 | 0.04 | 0.25 | 0.26 | 0.21 | 0.03 |
| 355 | 77 | 10 | 96 | 100 | 85 | 12 | 0.20 | 0.03 | 0.25 | 0.26 | 0.22 | 0.03 |
| 356 | 76 | 6  | 92 | 95  | 91 | 9  | 0.21 | 0.02 | 0.25 | 0.26 | 0.25 | 0.02 |
| 357 | 77 | 5  | 82 | 79  | 93 | 13 | 0.22 | 0.01 | 0.23 | 0.23 | 0.27 | 0.04 |
| 358 | 78 | 5  | 69 | 56  | 94 | 19 | 0.24 | 0.02 | 0.21 | 0.17 | 0.29 | 0.06 |
| 359 | 80 | 8  | 55 | 30  | 93 | 24 | 0.28 | 0.03 | 0.19 | 0.10 | 0.32 | 0.08 |
| 360 | 83 | 14 | 40 | 17  | 92 | 43 | 0.29 | 0.05 | 0.14 | 0.06 | 0.32 | 0.15 |
| 361 | 83 | 21 | 22 | 7   | 88 | 57 | 0.30 | 0.08 | 0.08 | 0.03 | 0.32 | 0.21 |
| 362 | 83 | 41 | 10 | 1   | 81 | 68 | 0.29 | 0.14 | 0.04 | 0.00 | 0.29 | 0.24 |
| 363 | 85 | 60 | 5  | 1   | 74 | 76 | 0.28 | 0.20 | 0.02 | 0.00 | 0.25 | 0.25 |
| 364 | 86 | 74 | 3  | 1   | 66 | 83 | 0.27 | 0.24 | 0.01 | 0.00 | 0.21 | 0.27 |
| 365 | 86 | 86 | 41 | 3   | 59 | 89 | 0.24 | 0.24 | 0.11 | 0.01 | 0.16 | 0.24 |
| 366 | 85 | 96 | 5  | 12  | 49 | 92 | 0.25 | 0.28 | 0.01 | 0.04 | 0.14 | 0.27 |
| 367 | 84 | 99 | 13 | 20  | 35 | 92 | 0.24 | 0.29 | 0.04 | 0.06 | 0.10 | 0.27 |
| 368 | 82 | 97 | 19 | 36  | 21 | 93 | 0.24 | 0.28 | 0.05 | 0.10 | 0.06 | 0.27 |
| 369 | 76 | 88 | 22 | 61  | 17 | 95 | 0.21 | 0.25 | 0.06 | 0.17 | 0.05 | 0.26 |
| 370 | 63 | 67 | 17 | 78  | 14 | 95 | 0.19 | 0.20 | 0.05 | 0.23 | 0.04 | 0.28 |
| 371 | 63 | 47 | 39 | 79  | 14 | 92 | 0.19 | 0.14 | 0.12 | 0.24 | 0.04 | 0.28 |
| 372 | 67 | 28 | 60 | 79  | 13 | 89 | 0.20 | 0.08 | 0.18 | 0.24 | 0.04 | 0.26 |
| 373 | 76 | 23 | 81 | 79  | 12 | 86 | 0.21 | 0.06 | 0.23 | 0.22 | 0.03 | 0.24 |
| 374 | 79 | 20 | 93 | 79  | 10 | 83 | 0.22 | 0.05 | 0.26 | 0.22 | 0.03 | 0.23 |
| 375 | 78 | 14 | 97 | 77  | 5  | 81 | 0.22 | 0.04 | 0.28 | 0.22 | 0.01 | 0.23 |
| 376 | 76 | 8  | 96 | 63  | 2  | 76 | 0.24 | 0.02 | 0.30 | 0.20 | 0.01 | 0.24 |
| 377 | 76 | 4  | 91 | 43  | 3  | 69 | 0.27 | 0.01 | 0.32 | 0.15 | 0.01 | 0.24 |
| 378 | 77 | 5  | 81 | 26  | 5  | 61 | 0.30 | 0.02 | 0.32 | 0.10 | 0.02 | 0.24 |
| 379 | 61 | 0  | 71 | 11  | 11 | 52 | 0.30 | 0.00 | 0.34 | 0.05 | 0.05 | 0.25 |
| 380 | 2  | 48 | 3  | 3   | 15 | 43 | 0.02 | 0.42 | 0.03 | 0.03 | 0.13 | 0.38 |
| 381 | 4  | 56 | 3  | 1   | 4  | 34 | 0.04 | 0.55 | 0.03 | 0.01 | 0.04 | 0.33 |
| 382 | 67 | 71 | 2  | 1   | 3  | 26 | 0.39 | 0.42 | 0.01 | 0.01 | 0.02 | 0.15 |
| 383 | 78 | 84 | 2  | 35  | 1  | 5  | 0.38 | 0.41 | 0.01 | 0.17 | 0.00 | 0.02 |
| 384 | 75 | 94 | 6  | 53  | 1  | 39 | 0.28 | 0.35 | 0.02 | 0.20 | 0.00 | 0.15 |
| 385 | 75 | 98 | 14 | 73  | 2  | 50 | 0.24 | 0.31 | 0.04 | 0.23 | 0.01 | 0.16 |
| 386 | 72 | 97 | 21 | 81  | 10 | 56 | 0.21 | 0.29 | 0.06 | 0.24 | 0.03 | 0.17 |
| 387 | 66 | 91 | 23 | 93  | 16 | 60 | 0.19 | 0.26 | 0.07 | 0.27 | 0.05 | 0.17 |
| 388 | 50 | 73 | 20 | 94  | 20 | 66 | 0.15 | 0.23 | 0.06 | 0.29 | 0.06 | 0.20 |
| 389 | 50 | 56 | 41 | 84  | 22 | 71 | 0.15 | 0.17 | 0.13 | 0.26 | 0.07 | 0.22 |
| 390 | 53 | 38 | 63 | 73  | 23 | 77 | 0.16 | 0.12 | 0.19 | 0.22 | 0.07 | 0.24 |

|     |    |    |    |    |    |     |      |      |      |      |      |      |
|-----|----|----|----|----|----|-----|------|------|------|------|------|------|
| 391 | 59 | 25 | 79 | 63 | 23 | 78  | 0.18 | 0.08 | 0.24 | 0.19 | 0.07 | 0.24 |
| 392 | 69 | 22 | 93 | 36 | 41 | 83  | 0.20 | 0.06 | 0.27 | 0.10 | 0.12 | 0.24 |
| 393 | 73 | 17 | 97 | 23 | 61 | 93  | 0.20 | 0.05 | 0.27 | 0.06 | 0.17 | 0.26 |
| 394 | 73 | 8  | 95 | 15 | 74 | 99  | 0.20 | 0.02 | 0.26 | 0.04 | 0.20 | 0.27 |
| 395 | 73 | 2  | 88 | 5  | 79 | 99  | 0.21 | 0.01 | 0.25 | 0.01 | 0.23 | 0.29 |
| 396 | 72 | 1  | 77 | 1  | 83 | 99  | 0.22 | 0.00 | 0.23 | 0.00 | 0.25 | 0.30 |
| 397 | 73 | 1  | 64 | 1  | 88 | 98  | 0.22 | 0.00 | 0.20 | 0.00 | 0.27 | 0.30 |
| 398 | 73 | 1  | 49 | 0  | 92 | 97  | 0.23 | 0.00 | 0.16 | 0.00 | 0.29 | 0.31 |
| 399 | 72 | 8  | 34 | 2  | 97 | 95  | 0.23 | 0.03 | 0.11 | 0.01 | 0.31 | 0.31 |
| 400 | 68 | 17 | 17 | 12 | 97 | 86  | 0.23 | 0.06 | 0.06 | 0.04 | 0.33 | 0.29 |
| 401 | 69 | 34 | 7  | 22 | 95 | 72  | 0.23 | 0.11 | 0.02 | 0.07 | 0.32 | 0.24 |
| 402 | 70 | 51 | 3  | 27 | 98 | 48  | 0.24 | 0.17 | 0.01 | 0.09 | 0.33 | 0.16 |
| 403 | 70 | 66 | 2  | 41 | 73 | 23  | 0.25 | 0.24 | 0.01 | 0.15 | 0.27 | 0.08 |
| 404 | 70 | 80 | 4  | 69 | 61 | 18  | 0.23 | 0.26 | 0.01 | 0.23 | 0.20 | 0.06 |
| 405 | 69 | 91 | 9  | 91 | 49 | 17  | 0.21 | 0.28 | 0.03 | 0.28 | 0.15 | 0.05 |
| 406 | 67 | 97 | 16 | 97 | 49 | 16  | 0.20 | 0.28 | 0.05 | 0.28 | 0.14 | 0.05 |
| 407 | 65 | 97 | 22 | 94 | 47 | 14  | 0.19 | 0.29 | 0.06 | 0.28 | 0.14 | 0.04 |
| 408 | 56 | 92 | 25 | 92 | 39 | 12  | 0.18 | 0.29 | 0.08 | 0.29 | 0.12 | 0.04 |
| 409 | 41 | 77 | 23 | 85 | 31 | 9   | 0.15 | 0.29 | 0.09 | 0.32 | 0.12 | 0.03 |
| 410 | 41 | 61 | 44 | 65 | 27 | 6   | 0.17 | 0.25 | 0.18 | 0.27 | 0.11 | 0.02 |
| 411 | 46 | 45 | 65 | 47 | 18 | 4   | 0.20 | 0.20 | 0.29 | 0.21 | 0.08 | 0.02 |
| 412 | 50 | 28 | 80 | 27 | 1  | 3   | 0.26 | 0.15 | 0.42 | 0.14 | 0.01 | 0.02 |
| 413 | 59 | 22 | 93 | 12 | 1  | 2   | 0.31 | 0.12 | 0.49 | 0.06 | 0.01 | 0.01 |
| 414 | 65 | 17 | 96 | 8  | 2  | 2   | 0.34 | 0.09 | 0.51 | 0.04 | 0.01 | 0.01 |
| 415 | 68 | 9  | 95 | 18 | 2  | 1   | 0.35 | 0.05 | 0.49 | 0.09 | 0.01 | 0.01 |
| 416 | 67 | 2  | 89 | 36 | 1  | 12  | 0.32 | 0.01 | 0.43 | 0.17 | 0.00 | 0.06 |
| 417 | 70 | 1  | 76 | 54 | 2  | 27  | 0.30 | 0.00 | 0.33 | 0.23 | 0.01 | 0.12 |
| 418 | 36 | 0  | 62 | 75 | 7  | 34  | 0.17 | 0.00 | 0.29 | 0.35 | 0.03 | 0.16 |
| 419 | 1  | 5  | 56 | 84 | 15 | 39  | 0.01 | 0.03 | 0.28 | 0.42 | 0.08 | 0.20 |
| 420 | 37 | 81 | 11 | 85 | 20 | 43  | 0.13 | 0.29 | 0.04 | 0.31 | 0.07 | 0.16 |
| 421 | 4  | 47 | 2  | 86 | 23 | 48  | 0.02 | 0.22 | 0.01 | 0.41 | 0.11 | 0.23 |
| 422 | 51 | 62 | 2  | 86 | 26 | 54  | 0.18 | 0.22 | 0.01 | 0.31 | 0.09 | 0.19 |
| 423 | 61 | 77 | 3  | 84 | 25 | 60  | 0.20 | 0.25 | 0.01 | 0.27 | 0.08 | 0.19 |
| 424 | 58 | 88 | 9  | 57 | 35 | 61  | 0.19 | 0.29 | 0.03 | 0.19 | 0.11 | 0.20 |
| 425 | 57 | 96 | 17 | 31 | 55 | 69  | 0.18 | 0.30 | 0.05 | 0.10 | 0.17 | 0.21 |
| 426 | 52 | 97 | 23 | 23 | 74 | 84  | 0.15 | 0.27 | 0.07 | 0.07 | 0.21 | 0.24 |
| 427 | 41 | 93 | 25 | 15 | 85 | 97  | 0.12 | 0.26 | 0.07 | 0.04 | 0.24 | 0.27 |
| 428 | 29 | 83 | 31 | 5  | 88 | 100 | 0.09 | 0.25 | 0.09 | 0.01 | 0.26 | 0.30 |
| 429 | 29 | 70 | 50 | 1  | 88 | 98  | 0.09 | 0.21 | 0.15 | 0.00 | 0.26 | 0.29 |
| 430 | 33 | 54 | 69 | 1  | 90 | 99  | 0.10 | 0.16 | 0.20 | 0.00 | 0.26 | 0.29 |
| 431 | 38 | 39 | 83 | 1  | 92 | 99  | 0.11 | 0.11 | 0.24 | 0.00 | 0.26 | 0.28 |
| 432 | 42 | 26 | 91 | 2  | 94 | 98  | 0.12 | 0.07 | 0.26 | 0.01 | 0.27 | 0.28 |
| 433 | 49 | 19 | 94 | 12 | 95 | 94  | 0.13 | 0.05 | 0.26 | 0.03 | 0.26 | 0.26 |
| 434 | 54 | 13 | 91 | 21 | 89 | 94  | 0.15 | 0.04 | 0.25 | 0.06 | 0.25 | 0.26 |

---

|     |    |    |    |    |    |    |      |      |      |      |      |      |
|-----|----|----|----|----|----|----|------|------|------|------|------|------|
| 435 | 56 | 4  | 82 | 27 | 77 | 64 | 0.18 | 0.01 | 0.26 | 0.09 | 0.25 | 0.21 |
| 436 | 55 | 1  | 70 | 41 | 60 | 47 | 0.20 | 0.00 | 0.26 | 0.15 | 0.22 | 0.17 |
| 437 | 55 | 1  | 55 | 69 | 41 | 41 | 0.21 | 0.00 | 0.21 | 0.26 | 0.16 | 0.16 |
| 438 | 55 | 2  | 41 | 88 | 30 | 37 | 0.22 | 0.01 | 0.16 | 0.35 | 0.12 | 0.15 |
| 439 | 54 | 3  | 29 | 88 | 28 | 32 | 0.23 | 0.01 | 0.12 | 0.38 | 0.12 | 0.14 |
| 440 | 53 | 14 | 12 | 88 | 26 | 27 | 0.24 | 0.06 | 0.05 | 0.40 | 0.12 | 0.12 |
| 441 | 53 | 27 | 4  | 87 | 22 | 25 | 0.24 | 0.12 | 0.02 | 0.40 | 0.10 | 0.11 |
| 442 | 53 | 41 | 2  | 93 | 17 | 23 | 0.23 | 0.18 | 0.01 | 0.41 | 0.07 | 0.10 |
| 443 | 52 | 58 | 2  | 65 | 12 | 17 | 0.25 | 0.28 | 0.01 | 0.32 | 0.06 | 0.08 |
| 444 | 51 | 72 | 4  | 47 | 7  | 13 | 0.26 | 0.37 | 0.02 | 0.24 | 0.04 | 0.07 |
| 445 | 50 | 84 | 10 | 28 | 2  | 28 | 0.25 | 0.42 | 0.05 | 0.14 | 0.01 | 0.14 |
| 446 | 47 | 93 | 18 | 11 | 2  | 4  | 0.27 | 0.53 | 0.10 | 0.06 | 0.01 | 0.02 |
| 447 | 42 | 96 | 24 | 2  | 1  | 1  | 0.25 | 0.58 | 0.14 | 0.01 | 0.01 | 0.01 |
| 448 | 33 | 94 | 29 | 1  | 0  | 0  | 0.21 | 0.60 | 0.18 | 0.01 | 0.00 | 0.00 |
| 449 | 28 | 88 | 42 | 6  | 2  | 2  | 0.17 | 0.52 | 0.25 | 0.04 | 0.01 | 0.01 |
| 450 | 27 | 76 | 58 | 19 | 3  | 2  | 0.15 | 0.41 | 0.31 | 0.10 | 0.02 | 0.01 |
| 451 | 27 | 61 | 73 | 36 | 6  | 7  | 0.13 | 0.29 | 0.35 | 0.17 | 0.03 | 0.03 |
| 452 | 31 | 45 | 85 | 54 | 12 | 11 | 0.13 | 0.19 | 0.36 | 0.23 | 0.05 | 0.05 |
| 453 | 36 | 31 | 92 | 73 | 15 | 7  | 0.14 | 0.12 | 0.36 | 0.29 | 0.06 | 0.03 |
| 454 | 41 | 20 | 93 | 86 | 21 | 20 | 0.15 | 0.07 | 0.33 | 0.31 | 0.07 | 0.07 |
| 455 | 47 | 14 | 90 | 88 | 26 | 22 | 0.16 | 0.05 | 0.31 | 0.31 | 0.09 | 0.08 |
| 456 | 48 | 6  | 81 | 89 | 25 | 29 | 0.17 | 0.02 | 0.29 | 0.32 | 0.09 | 0.10 |
| 457 | 51 | 16 | 68 | 89 | 31 | 30 | 0.18 | 0.06 | 0.24 | 0.31 | 0.11 | 0.11 |
| 458 | 27 | 1  | 54 | 83 | 33 | 36 | 0.12 | 0.00 | 0.23 | 0.35 | 0.14 | 0.15 |
| 459 | 1  | 2  | 44 | 55 | 52 | 40 | 0.01 | 0.01 | 0.23 | 0.28 | 0.27 | 0.21 |
| 460 | 1  | 26 | 1  | 29 | 69 | 50 | 0.01 | 0.15 | 0.01 | 0.16 | 0.39 | 0.28 |
| 461 | 3  | 38 | 2  | 24 | 84 | 75 | 0.01 | 0.17 | 0.01 | 0.11 | 0.37 | 0.33 |
| 462 | 35 | 54 | 2  | 15 | 92 | 91 | 0.12 | 0.19 | 0.01 | 0.05 | 0.32 | 0.31 |
| 463 | 41 | 68 | 5  | 4  | 95 | 95 | 0.13 | 0.22 | 0.02 | 0.01 | 0.31 | 0.31 |
| 464 | 37 | 81 | 11 | 1  | 93 | 99 | 0.11 | 0.25 | 0.03 | 0.00 | 0.29 | 0.31 |
| 465 | 33 | 90 | 19 | 1  | 91 | 99 | 0.10 | 0.27 | 0.06 | 0.00 | 0.27 | 0.30 |
| 466 | 29 | 96 | 27 | 0  | 90 | 99 | 0.09 | 0.28 | 0.08 | 0.00 | 0.26 | 0.29 |
| 467 | 26 | 96 | 41 | 3  | 89 | 90 | 0.08 | 0.28 | 0.12 | 0.01 | 0.26 | 0.26 |
| 468 | 26 | 93 | 58 | 11 | 89 | 97 | 0.07 | 0.25 | 0.16 | 0.03 | 0.24 | 0.26 |
| 469 | 25 | 85 | 71 | 21 | 80 | 97 | 0.07 | 0.22 | 0.19 | 0.06 | 0.21 | 0.26 |
| 470 | 24 | 72 | 82 | 26 | 64 | 77 | 0.07 | 0.21 | 0.24 | 0.08 | 0.19 | 0.22 |
| 471 | 24 | 57 | 89 | 44 | 45 | 65 | 0.07 | 0.18 | 0.27 | 0.14 | 0.14 | 0.20 |
| 472 | 25 | 41 | 92 | 73 | 24 | 62 | 0.08 | 0.13 | 0.29 | 0.23 | 0.08 | 0.20 |
| 473 | 29 | 27 | 91 | 86 | 24 | 61 | 0.09 | 0.08 | 0.29 | 0.27 | 0.08 | 0.19 |
| 474 | 33 | 16 | 85 | 86 | 24 | 55 | 0.11 | 0.05 | 0.28 | 0.29 | 0.08 | 0.18 |
| 475 | 36 | 9  | 75 | 85 | 22 | 49 | 0.13 | 0.03 | 0.27 | 0.31 | 0.08 | 0.18 |
| 476 | 38 | 2  | 62 | 84 | 17 | 44 | 0.15 | 0.01 | 0.25 | 0.34 | 0.07 | 0.18 |
| 477 | 37 | 1  | 48 | 81 | 10 | 41 | 0.17 | 0.00 | 0.22 | 0.37 | 0.05 | 0.19 |
| 478 | 36 | 1  | 33 | 67 | 3  | 34 | 0.21 | 0.01 | 0.19 | 0.39 | 0.02 | 0.20 |

---



|     |    |    |    |    |    |     |      |      |      |      |      |      |
|-----|----|----|----|----|----|-----|------|------|------|------|------|------|
| 479 | 37 | 1  | 20 | 46 | 2  | 25  | 0.28 | 0.01 | 0.15 | 0.35 | 0.02 | 0.19 |
| 480 | 36 | 7  | 9  | 27 | 2  | 18  | 0.36 | 0.07 | 0.09 | 0.27 | 0.02 | 0.18 |
| 481 | 36 | 19 | 2  | 12 | 1  | 11  | 0.44 | 0.23 | 0.02 | 0.15 | 0.01 | 0.14 |
| 482 | 36 | 33 | 2  | 2  | 2  | 5   | 0.45 | 0.41 | 0.03 | 0.03 | 0.03 | 0.06 |
| 483 | 35 | 49 | 3  | 1  | 1  | 3   | 0.38 | 0.53 | 0.03 | 0.01 | 0.01 | 0.03 |
| 484 | 33 | 63 | 7  | 1  | 1  | 1   | 0.31 | 0.59 | 0.07 | 0.01 | 0.01 | 0.01 |
| 485 | 30 | 78 | 14 | 6  | 6  | 2   | 0.22 | 0.57 | 0.10 | 0.04 | 0.04 | 0.01 |
| 486 | 26 | 87 | 23 | 19 | 12 | 1   | 0.15 | 0.52 | 0.14 | 0.11 | 0.07 | 0.01 |
| 487 | 21 | 96 | 50 | 36 | 19 | 2   | 0.09 | 0.43 | 0.22 | 0.16 | 0.08 | 0.01 |
| 488 | 24 | 97 | 50 | 55 | 26 | 3   | 0.09 | 0.38 | 0.20 | 0.22 | 0.10 | 0.01 |
| 489 | 23 | 96 | 65 | 74 | 33 | 5   | 0.08 | 0.32 | 0.22 | 0.25 | 0.11 | 0.02 |
| 490 | 22 | 88 | 78 | 91 | 39 | 9   | 0.07 | 0.27 | 0.24 | 0.28 | 0.12 | 0.03 |
| 491 | 22 | 77 | 88 | 95 | 48 | 12  | 0.06 | 0.23 | 0.26 | 0.28 | 0.14 | 0.04 |
| 492 | 22 | 63 | 93 | 96 | 53 | 15  | 0.06 | 0.18 | 0.27 | 0.28 | 0.15 | 0.04 |
| 493 | 21 | 47 | 94 | 97 | 54 | 17  | 0.06 | 0.14 | 0.28 | 0.29 | 0.16 | 0.05 |
| 494 | 23 | 31 | 91 | 87 | 59 | 17  | 0.07 | 0.10 | 0.30 | 0.28 | 0.19 | 0.06 |
| 495 | 26 | 20 | 84 | 58 | 69 | 18  | 0.09 | 0.07 | 0.31 | 0.21 | 0.25 | 0.07 |
| 496 | 30 | 10 | 73 | 30 | 80 | 29  | 0.12 | 0.04 | 0.29 | 0.12 | 0.32 | 0.12 |
| 497 | 33 | 2  | 61 | 24 | 92 | 60  | 0.12 | 0.01 | 0.22 | 0.09 | 0.34 | 0.22 |
| 498 | 17 | 1  | 46 | 16 | 96 | 79  | 0.07 | 0.00 | 0.18 | 0.06 | 0.38 | 0.31 |
| 499 | 1  | 3  | 33 | 5  | 97 | 89  | 0.00 | 0.01 | 0.14 | 0.02 | 0.43 | 0.39 |
| 500 | 2  | 16 | 2  | 1  | 94 | 95  | 0.01 | 0.08 | 0.01 | 0.00 | 0.45 | 0.45 |
| 501 | 3  | 29 | 2  | 1  | 91 | 94  | 0.01 | 0.13 | 0.01 | 0.00 | 0.41 | 0.43 |
| 502 | 20 | 45 | 4  | 1  | 86 | 99  | 0.08 | 0.18 | 0.02 | 0.00 | 0.34 | 0.39 |
| 503 | 23 | 60 | 9  | 3  | 84 | 99  | 0.08 | 0.22 | 0.03 | 0.01 | 0.30 | 0.36 |
| 504 | 19 | 73 | 19 | 11 | 78 | 100 | 0.06 | 0.24 | 0.06 | 0.04 | 0.26 | 0.33 |
| 505 | 19 | 85 | 31 | 20 | 67 | 95  | 0.06 | 0.27 | 0.10 | 0.06 | 0.21 | 0.30 |
| 506 | 19 | 94 | 46 | 27 | 48 | 86  | 0.06 | 0.29 | 0.14 | 0.08 | 0.15 | 0.27 |
| 507 | 19 | 98 | 60 | 48 | 30 | 90  | 0.06 | 0.28 | 0.17 | 0.14 | 0.09 | 0.26 |
| 508 | 18 | 98 | 74 | 73 | 28 | 81  | 0.05 | 0.26 | 0.20 | 0.20 | 0.08 | 0.22 |
| 509 | 19 | 94 | 85 | 84 | 22 | 76  | 0.05 | 0.25 | 0.22 | 0.22 | 0.06 | 0.20 |
| 510 | 18 | 84 | 92 | 83 | 20 | 71  | 0.05 | 0.23 | 0.25 | 0.23 | 0.05 | 0.19 |
| 511 | 17 | 72 | 95 | 93 | 17 | 66  | 0.05 | 0.20 | 0.26 | 0.26 | 0.05 | 0.18 |
| 512 | 17 | 57 | 95 | 82 | 12 | 61  | 0.05 | 0.18 | 0.29 | 0.25 | 0.04 | 0.19 |
| 513 | 17 | 52 | 90 | 79 | 56 | 5   | 0.06 | 0.17 | 0.30 | 0.26 | 0.19 | 0.02 |
| 514 | 17 | 28 | 80 | 66 | 1  | 48  | 0.07 | 0.12 | 0.33 | 0.28 | 0.00 | 0.20 |
| 515 | 19 | 16 | 67 | 45 | 1  | 39  | 0.10 | 0.09 | 0.36 | 0.24 | 0.01 | 0.21 |
| 516 | 20 | 6  | 54 | 28 | 1  | 31  | 0.14 | 0.04 | 0.39 | 0.20 | 0.01 | 0.22 |
| 517 | 20 | 2  | 39 | 12 | 1  | 24  | 0.20 | 0.02 | 0.40 | 0.12 | 0.01 | 0.24 |
| 518 | 20 | 2  | 25 | 3  | 2  | 14  | 0.30 | 0.03 | 0.38 | 0.05 | 0.03 | 0.21 |
| 519 | 20 | 0  | 14 | 2  | 2  | 9   | 0.43 | 0.00 | 0.30 | 0.04 | 0.04 | 0.19 |
| 520 | 20 | 3  | 4  | 3  | 5  | 2   | 0.54 | 0.08 | 0.11 | 0.08 | 0.14 | 0.05 |
| 521 | 20 | 12 | 2  | 3  | 8  | 1   | 0.43 | 0.26 | 0.04 | 0.07 | 0.17 | 0.02 |
| 522 | 20 | 25 | 2  | 7  | 16 | 2   | 0.28 | 0.35 | 0.03 | 0.10 | 0.22 | 0.03 |

|     |    |    |    |     |    |    |      |      |      |      |      |      |
|-----|----|----|----|-----|----|----|------|------|------|------|------|------|
| 523 | 18 | 39 | 6  | 20  | 24 | 2  | 0.17 | 0.36 | 0.06 | 0.18 | 0.22 | 0.02 |
| 524 | 16 | 54 | 13 | 36  | 33 | 1  | 0.10 | 0.35 | 0.08 | 0.24 | 0.22 | 0.01 |
| 525 | 15 | 69 | 24 | 55  | 41 | 1  | 0.07 | 0.34 | 0.12 | 0.27 | 0.20 | 0.00 |
| 526 | 15 | 82 | 37 | 74  | 50 | 1  | 0.06 | 0.32 | 0.14 | 0.29 | 0.19 | 0.00 |
| 527 | 15 | 93 | 52 | 92  | 57 | 3  | 0.05 | 0.30 | 0.17 | 0.29 | 0.18 | 0.01 |
| 528 | 15 | 97 | 66 | 99  | 66 | 7  | 0.04 | 0.28 | 0.19 | 0.28 | 0.19 | 0.02 |
| 529 | 15 | 98 | 78 | 100 | 72 | 12 | 0.04 | 0.26 | 0.21 | 0.27 | 0.19 | 0.03 |
| 530 | 14 | 96 | 89 | 100 | 75 | 15 | 0.04 | 0.25 | 0.23 | 0.26 | 0.19 | 0.04 |
| 531 | 14 | 87 | 94 | 92  | 83 | 18 | 0.04 | 0.22 | 0.24 | 0.24 | 0.21 | 0.05 |
| 532 | 14 | 75 | 95 | 73  | 87 | 20 | 0.04 | 0.21 | 0.26 | 0.20 | 0.24 | 0.05 |
| 533 | 13 | 61 | 95 | 45  | 91 | 23 | 0.04 | 0.19 | 0.29 | 0.14 | 0.28 | 0.07 |
| 534 | 13 | 47 | 90 | 25  | 94 | 41 | 0.04 | 0.15 | 0.29 | 0.08 | 0.30 | 0.13 |
| 535 | 13 | 32 | 79 | 17  | 96 | 63 | 0.04 | 0.11 | 0.26 | 0.06 | 0.32 | 0.21 |
| 536 | 14 | 18 | 66 | 5   | 95 | 76 | 0.05 | 0.07 | 0.24 | 0.02 | 0.35 | 0.28 |
| 537 | 15 | 8  | 53 | 1   | 90 | 85 | 0.06 | 0.03 | 0.21 | 0.00 | 0.36 | 0.34 |
| 538 | 8  | 1  | 38 | 0   | 85 | 91 | 0.04 | 0.00 | 0.17 | 0.00 | 0.38 | 0.41 |
| 539 | 2  | 3  | 24 | 0   | 78 | 94 | 0.01 | 0.01 | 0.12 | 0.00 | 0.39 | 0.47 |
| 540 | 1  | 9  | 2  | 2   | 73 | 93 | 0.01 | 0.05 | 0.01 | 0.01 | 0.41 | 0.52 |
| 541 | 2  | 21 | 3  | 11  | 65 | 71 | 0.01 | 0.12 | 0.02 | 0.06 | 0.38 | 0.41 |
| 542 | 8  | 37 | 8  | 20  | 52 | 96 | 0.04 | 0.17 | 0.04 | 0.09 | 0.24 | 0.43 |
| 543 | 9  | 51 | 17 | 32  | 34 | 92 | 0.04 | 0.22 | 0.07 | 0.14 | 0.14 | 0.39 |
| 544 | 9  | 66 | 30 | 55  | 22 | 91 | 0.03 | 0.24 | 0.11 | 0.20 | 0.08 | 0.33 |
| 545 | 8  | 79 | 44 | 79  | 19 | 12 | 0.03 | 0.33 | 0.18 | 0.33 | 0.08 | 0.05 |
| 546 | 8  | 90 | 57 | 81  | 18 | 97 | 0.02 | 0.26 | 0.16 | 0.23 | 0.05 | 0.28 |
| 547 | 8  | 97 | 72 | 81  | 16 | 82 | 0.02 | 0.27 | 0.20 | 0.23 | 0.04 | 0.23 |
| 548 | 8  | 97 | 91 | 81  | 14 | 78 | 0.02 | 0.26 | 0.25 | 0.22 | 0.04 | 0.21 |
| 549 | 7  | 91 | 96 | 79  | 10 | 23 | 0.02 | 0.30 | 0.31 | 0.26 | 0.03 | 0.08 |
| 550 | 7  | 81 | 96 | 77  | 4  | 70 | 0.02 | 0.24 | 0.29 | 0.23 | 0.01 | 0.21 |
| 551 | 7  | 68 | 93 | 64  | 1  | 64 | 0.02 | 0.23 | 0.31 | 0.22 | 0.00 | 0.22 |
| 552 | 6  | 54 | 86 | 44  | 2  | 55 | 0.02 | 0.22 | 0.35 | 0.18 | 0.01 | 0.22 |
| 553 | 6  | 40 | 74 | 27  | 1  | 46 | 0.03 | 0.21 | 0.38 | 0.14 | 0.01 | 0.24 |
| 554 | 6  | 25 | 61 | 12  | 2  | 37 | 0.04 | 0.17 | 0.43 | 0.08 | 0.01 | 0.26 |
| 555 | 6  | 13 | 46 | 2   | 3  | 28 | 0.06 | 0.13 | 0.47 | 0.02 | 0.03 | 0.29 |
| 556 | 6  | 4  | 32 | 2   | 3  | 19 | 0.09 | 0.06 | 0.48 | 0.03 | 0.05 | 0.29 |
| 557 | 6  | 2  | 18 | 2   | 3  | 15 | 0.13 | 0.04 | 0.39 | 0.04 | 0.07 | 0.33 |
| 558 | 5  | 2  | 7  | 3   | 13 | 1  | 0.16 | 0.06 | 0.23 | 0.10 | 0.42 | 0.03 |
| 559 | 5  | 2  | 2  | 4   | 20 | 1  | 0.15 | 0.06 | 0.06 | 0.12 | 0.59 | 0.03 |
| 560 | 6  | 5  | 2  | 6   | 31 | 7  | 0.11 | 0.09 | 0.04 | 0.11 | 0.54 | 0.12 |
| 561 | 6  | 17 | 4  | 18  | 39 | 4  | 0.07 | 0.19 | 0.05 | 0.20 | 0.44 | 0.05 |
| 562 | 5  | 31 | 11 | 35  | 48 | 2  | 0.04 | 0.23 | 0.08 | 0.27 | 0.36 | 0.02 |
| 563 | 5  | 45 | 22 | 54  | 57 | 1  | 0.03 | 0.24 | 0.12 | 0.29 | 0.31 | 0.01 |
| 564 | 5  | 61 | 34 | 73  | 64 | 1  | 0.02 | 0.26 | 0.14 | 0.31 | 0.27 | 0.00 |
| 565 | 5  | 75 | 48 | 92  | 69 | 2  | 0.02 | 0.26 | 0.16 | 0.32 | 0.24 | 0.01 |
| 566 | 4  | 87 | 62 | 100 | 77 | 4  | 0.01 | 0.26 | 0.19 | 0.30 | 0.23 | 0.01 |

|     |   |    |    |     |    |    |      |      |      |      |      |      |
|-----|---|----|----|-----|----|----|------|------|------|------|------|------|
| 567 | 4 | 96 | 76 | 100 | 81 | 11 | 0.01 | 0.26 | 0.21 | 0.27 | 0.22 | 0.03 |
| 568 | 5 | 98 | 86 | 100 | 85 | 12 | 0.01 | 0.25 | 0.22 | 0.26 | 0.22 | 0.03 |
| 569 | 4 | 98 | 93 | 95  | 91 | 8  | 0.01 | 0.25 | 0.24 | 0.24 | 0.23 | 0.02 |
| 570 | 4 | 93 | 96 | 79  | 94 | 13 | 0.01 | 0.25 | 0.25 | 0.21 | 0.25 | 0.03 |
| 571 | 3 | 83 | 97 | 56  | 94 | 19 | 0.01 | 0.24 | 0.28 | 0.16 | 0.27 | 0.05 |
| 572 | 3 | 70 | 93 | 30  | 93 | 24 | 0.01 | 0.22 | 0.30 | 0.10 | 0.30 | 0.08 |
| 573 | 3 | 57 | 85 | 17  | 92 | 43 | 0.01 | 0.19 | 0.29 | 0.06 | 0.31 | 0.14 |
| 574 | 3 | 42 | 73 | 7   | 88 | 57 | 0.01 | 0.16 | 0.27 | 0.03 | 0.33 | 0.21 |
| 575 | 3 | 27 | 60 | 1   | 81 | 68 | 0.01 | 0.11 | 0.25 | 0.00 | 0.34 | 0.28 |
| 576 | 4 | 14 | 46 | 1   | 74 | 76 | 0.02 | 0.07 | 0.21 | 0.00 | 0.34 | 0.35 |
| 577 | 2 | 5  | 31 | 1   | 66 | 83 | 0.01 | 0.03 | 0.16 | 0.01 | 0.35 | 0.44 |
| 578 | 2 | 3  | 16 | 3   | 59 | 89 | 0.01 | 0.02 | 0.09 | 0.02 | 0.34 | 0.52 |
| 579 | 2 | 4  | 1  | 12  | 49 | 92 | 0.01 | 0.03 | 0.01 | 0.08 | 0.31 | 0.58 |
| 580 | 1 | 14 | 5  | 20  | 35 | 92 | 0.01 | 0.08 | 0.03 | 0.12 | 0.21 | 0.55 |
| 581 | 1 | 27 | 14 | 36  | 21 | 93 | 0.01 | 0.14 | 0.07 | 0.19 | 0.11 | 0.48 |
| 582 | 2 | 41 | 25 | 61  | 17 | 95 | 0.01 | 0.17 | 0.10 | 0.25 | 0.07 | 0.39 |
| 583 | 2 | 57 | 39 | 78  | 14 | 95 | 0.01 | 0.20 | 0.14 | 0.27 | 0.05 | 0.33 |
| 584 | 1 | 71 | 52 | 79  | 14 | 92 | 0.00 | 0.23 | 0.17 | 0.26 | 0.05 | 0.30 |
| 585 | 2 | 83 | 67 | 79  | 13 | 97 | 0.01 | 0.24 | 0.20 | 0.23 | 0.04 | 0.28 |
| 586 | 1 | 93 | 79 | 79  | 12 | 86 | 0.00 | 0.27 | 0.23 | 0.23 | 0.03 | 0.25 |
| 587 | 2 | 97 | 90 | 79  | 10 | 80 | 0.01 | 0.27 | 0.25 | 0.22 | 0.03 | 0.22 |
| 588 | 2 | 97 | 95 | 77  | 5  | 81 | 0.01 | 0.27 | 0.27 | 0.22 | 0.01 | 0.23 |
| 589 | 2 | 94 | 96 | 63  | 2  | 76 | 0.01 | 0.28 | 0.29 | 0.19 | 0.01 | 0.23 |
| 590 | 1 | 86 | 96 | 43  | 3  | 69 | 0.00 | 0.29 | 0.32 | 0.14 | 0.01 | 0.23 |
| 591 | 1 | 75 | 91 | 26  | 6  | 51 | 0.00 | 0.30 | 0.36 | 0.10 | 0.02 | 0.20 |
| 592 | 1 | 62 | 81 | 11  | 11 | 52 | 0.00 | 0.28 | 0.37 | 0.05 | 0.05 | 0.24 |
| 593 | 2 | 47 | 68 | 3   | 15 | 45 | 0.01 | 0.26 | 0.38 | 0.02 | 0.08 | 0.25 |
| 594 | 1 | 33 | 53 | 1   | 4  | 34 | 0.01 | 0.26 | 0.42 | 0.01 | 0.03 | 0.27 |
| 595 | 1 | 19 | 39 | 1   | 3  | 26 | 0.01 | 0.21 | 0.44 | 0.01 | 0.03 | 0.29 |
| 596 | 2 | 8  | 25 | 4   | 21 | 1  | 0.03 | 0.13 | 0.41 | 0.07 | 0.34 | 0.02 |
| 597 | 2 | 3  | 11 | 6   | 24 | 1  | 0.04 | 0.06 | 0.23 | 0.13 | 0.51 | 0.02 |
| 598 | 1 | 1  | 3  | 1   | 37 | 8  | 0.02 | 0.02 | 0.06 | 0.02 | 0.73 | 0.16 |
| 599 | 0 | 0  | 0  | 5   | 46 | 22 | 0.00 | 0.00 | 0.00 | 0.07 | 0.63 | 0.30 |
| 600 | 1 | 1  | 2  | 16  | 54 | 12 | 0.01 | 0.01 | 0.02 | 0.19 | 0.63 | 0.14 |
| 601 | 2 | 8  | 7  | 33  | 63 | 69 | 0.01 | 0.04 | 0.04 | 0.18 | 0.35 | 0.38 |
| 602 | 2 | 21 | 17 | 51  | 71 | 3  | 0.01 | 0.13 | 0.10 | 0.31 | 0.43 | 0.02 |
| 603 | 2 | 35 | 29 | 72  | 77 | 2  | 0.01 | 0.16 | 0.13 | 0.33 | 0.35 | 0.01 |
| 604 | 1 | 51 | 42 | 90  | 81 | 0  | 0.00 | 0.19 | 0.16 | 0.34 | 0.31 | 0.00 |
| 605 | 1 | 65 | 57 | 99  | 85 | 3  | 0.00 | 0.21 | 0.18 | 0.32 | 0.27 | 0.01 |
| 606 | 1 | 79 | 71 | 100 | 86 | 8  | 0.00 | 0.23 | 0.21 | 0.29 | 0.25 | 0.02 |
| 607 | 1 | 91 | 83 | 100 | 88 | 8  | 0.00 | 0.25 | 0.22 | 0.27 | 0.24 | 0.02 |
| 608 | 1 | 96 | 92 | 97  | 92 | 3  | 0.00 | 0.25 | 0.24 | 0.25 | 0.24 | 0.01 |
| 609 | 1 | 96 | 95 | 82  | 93 | 6  | 0.00 | 0.26 | 0.25 | 0.22 | 0.25 | 0.02 |
| 610 | 2 | 95 | 96 | 61  | 92 | 8  | 0.01 | 0.27 | 0.27 | 0.17 | 0.26 | 0.02 |

|     |    |    |    |     |    |    |      |      |      |      |      |      |
|-----|----|----|----|-----|----|----|------|------|------|------|------|------|
| 611 | 1  | 88 | 95 | 37  | 87 | 14 | 0.00 | 0.27 | 0.30 | 0.11 | 0.27 | 0.04 |
| 612 | 1  | 77 | 90 | 19  | 83 | 24 | 0.00 | 0.26 | 0.31 | 0.06 | 0.28 | 0.08 |
| 613 | 1  | 64 | 80 | 8   | 78 | 38 | 0.00 | 0.24 | 0.30 | 0.03 | 0.29 | 0.14 |
| 614 | 1  | 49 | 67 | 1   | 70 | 49 | 0.00 | 0.21 | 0.28 | 0.00 | 0.30 | 0.21 |
| 615 | 1  | 35 | 52 | 1   | 61 | 58 | 0.00 | 0.17 | 0.25 | 0.00 | 0.29 | 0.28 |
| 616 | 1  | 21 | 38 | 1   | 51 | 67 | 0.01 | 0.12 | 0.21 | 0.01 | 0.28 | 0.37 |
| 617 | 2  | 9  | 25 | 3   | 43 | 75 | 0.01 | 0.06 | 0.16 | 0.02 | 0.27 | 0.48 |
| 618 | 1  | 3  | 11 | 12  | 33 | 80 | 0.01 | 0.02 | 0.08 | 0.09 | 0.24 | 0.57 |
| 619 | 1  | 1  | 2  | 22  | 21 | 85 | 0.01 | 0.01 | 0.02 | 0.17 | 0.16 | 0.64 |
| 620 | 2  | 7  | 9  | 42  | 14 | 90 | 0.01 | 0.04 | 0.05 | 0.26 | 0.09 | 0.55 |
| 621 | 2  | 19 | 20 | 64  | 10 | 91 | 0.01 | 0.09 | 0.10 | 0.31 | 0.05 | 0.44 |
| 622 | 2  | 32 | 32 | 76  | 8  | 95 | 0.01 | 0.13 | 0.13 | 0.31 | 0.03 | 0.39 |
| 623 | 1  | 47 | 47 | 78  | 11 | 93 | 0.00 | 0.17 | 0.17 | 0.28 | 0.04 | 0.34 |
| 624 | 1  | 63 | 60 | 79  | 13 | 92 | 0.00 | 0.20 | 0.19 | 0.26 | 0.04 | 0.30 |
| 625 | 2  | 75 | 74 | 79  | 13 | 91 | 0.01 | 0.22 | 0.22 | 0.24 | 0.04 | 0.27 |
| 626 | 1  | 87 | 86 | 78  | 10 | 90 | 0.00 | 0.25 | 0.24 | 0.22 | 0.03 | 0.26 |
| 627 | 1  | 96 | 94 | 76  | 5  | 89 | 0.00 | 0.27 | 0.26 | 0.21 | 0.01 | 0.25 |
| 628 | 2  | 96 | 96 | 62  | 5  | 89 | 0.01 | 0.27 | 0.27 | 0.18 | 0.01 | 0.25 |
| 629 | 2  | 96 | 96 | 41  | 9  | 89 | 0.01 | 0.29 | 0.29 | 0.12 | 0.03 | 0.27 |
| 630 | 2  | 93 | 93 | 23  | 13 | 74 | 0.01 | 0.31 | 0.31 | 0.08 | 0.04 | 0.25 |
| 631 | 1  | 82 | 86 | 10  | 22 | 66 | 0.00 | 0.31 | 0.32 | 0.04 | 0.08 | 0.25 |
| 632 | 21 | 96 | 50 | 79  | 11 | 83 | 0.06 | 0.28 | 0.15 | 0.23 | 0.03 | 0.24 |
| 633 | 2  | 55 | 60 | 2   | 33 | 59 | 0.01 | 0.26 | 0.28 | 0.01 | 0.16 | 0.28 |
| 634 | 1  | 42 | 45 | 1   | 22 | 50 | 0.01 | 0.26 | 0.28 | 0.01 | 0.14 | 0.31 |
| 635 | 1  | 28 | 30 | 1   | 2  | 41 | 0.01 | 0.27 | 0.29 | 0.01 | 0.02 | 0.40 |
| 636 | 1  | 15 | 18 | 1   | 3  | 37 | 0.01 | 0.20 | 0.24 | 0.01 | 0.04 | 0.49 |
| 637 | 2  | 4  | 8  | 6   | 33 | 1  | 0.04 | 0.07 | 0.15 | 0.11 | 0.61 | 0.02 |
| 638 | 0  | 1  | 0  | 5   | 40 | 2  | 0.00 | 0.02 | 0.00 | 0.10 | 0.83 | 0.04 |
| 639 | 0  | 0  | 0  | 1   | 52 | 38 | 0.00 | 0.00 | 0.00 | 0.01 | 0.57 | 0.42 |
| 640 | 1  | 1  | 3  | 4   | 62 | 37 | 0.01 | 0.01 | 0.03 | 0.04 | 0.57 | 0.34 |
| 641 | 1  | 4  | 11 | 14  | 69 | 5  | 0.01 | 0.04 | 0.11 | 0.13 | 0.66 | 0.05 |
| 642 | 1  | 13 | 23 | 28  | 76 | 14 | 0.01 | 0.08 | 0.15 | 0.18 | 0.49 | 0.09 |
| 643 | 1  | 26 | 36 | 49  | 82 | 7  | 0.00 | 0.13 | 0.18 | 0.24 | 0.41 | 0.03 |
| 644 | 1  | 42 | 50 | 70  | 86 | 5  | 0.00 | 0.17 | 0.20 | 0.28 | 0.34 | 0.02 |
| 645 | 2  | 56 | 64 | 89  | 89 | 1  | 0.01 | 0.19 | 0.21 | 0.30 | 0.30 | 0.00 |
| 646 | 1  | 71 | 77 | 99  | 89 | 3  | 0.00 | 0.21 | 0.23 | 0.29 | 0.26 | 0.01 |
| 647 | 1  | 83 | 88 | 100 | 88 | 5  | 0.00 | 0.23 | 0.24 | 0.27 | 0.24 | 0.01 |
| 648 | 1  | 94 | 94 | 99  | 87 | 4  | 0.00 | 0.25 | 0.25 | 0.26 | 0.23 | 0.01 |
| 649 | 2  | 96 | 96 | 98  | 89 | 1  | 0.01 | 0.25 | 0.25 | 0.26 | 0.23 | 0.00 |
| 650 | 2  | 96 | 96 | 84  | 87 | 4  | 0.01 | 0.26 | 0.26 | 0.23 | 0.24 | 0.01 |
| 651 | 1  | 95 | 93 | 64  | 84 | 2  | 0.00 | 0.28 | 0.27 | 0.19 | 0.25 | 0.01 |
| 652 | 1  | 84 | 84 | 42  | 78 | 6  | 0.00 | 0.28 | 0.28 | 0.14 | 0.26 | 0.02 |
| 653 | 2  | 72 | 73 | 23  | 71 | 11 | 0.01 | 0.29 | 0.29 | 0.09 | 0.28 | 0.04 |
| 654 | 2  | 58 | 59 | 9   | 64 | 21 | 0.01 | 0.27 | 0.28 | 0.04 | 0.30 | 0.10 |

|     |   |    |    |     |    |    |      |      |      |      |      |      |
|-----|---|----|----|-----|----|----|------|------|------|------|------|------|
| 655 | 1 | 44 | 45 | 3   | 54 | 32 | 0.01 | 0.25 | 0.25 | 0.02 | 0.30 | 0.18 |
| 656 | 1 | 30 | 30 | 2   | 44 | 41 | 0.01 | 0.20 | 0.20 | 0.01 | 0.30 | 0.28 |
| 657 | 1 | 17 | 18 | 2   | 35 | 50 | 0.01 | 0.14 | 0.15 | 0.02 | 0.28 | 0.41 |
| 658 | 2 | 5  | 8  | 3   | 27 | 59 | 0.02 | 0.05 | 0.08 | 0.03 | 0.26 | 0.57 |
| 659 | 1 | 1  | 4  | 12  | 18 | 67 | 0.01 | 0.01 | 0.04 | 0.12 | 0.17 | 0.65 |
| 660 | 1 | 4  | 13 | 27  | 10 | 75 | 0.01 | 0.03 | 0.10 | 0.21 | 0.08 | 0.58 |
| 661 | 2 | 11 | 27 | 45  | 7  | 82 | 0.01 | 0.06 | 0.16 | 0.26 | 0.04 | 0.47 |
| 662 | 1 | 24 | 40 | 65  | 4  | 87 | 0.00 | 0.11 | 0.18 | 0.29 | 0.02 | 0.39 |
| 663 | 1 | 38 | 55 | 76  | 6  | 90 | 0.00 | 0.14 | 0.21 | 0.29 | 0.02 | 0.34 |
| 664 | 1 | 54 | 68 | 78  | 11 | 91 | 0.00 | 0.18 | 0.22 | 0.26 | 0.04 | 0.30 |
| 665 | 2 | 67 | 81 | 79  | 13 | 91 | 0.01 | 0.20 | 0.24 | 0.24 | 0.04 | 0.27 |
| 666 | 1 | 81 | 91 | 79  | 13 | 92 | 0.00 | 0.23 | 0.25 | 0.22 | 0.04 | 0.26 |
| 667 | 2 | 90 | 95 | 78  | 12 | 93 | 0.01 | 0.24 | 0.26 | 0.21 | 0.03 | 0.25 |
| 668 | 2 | 96 | 96 | 76  | 9  | 95 | 0.01 | 0.26 | 0.26 | 0.20 | 0.02 | 0.25 |
| 669 | 2 | 97 | 96 | 60  | 12 | 93 | 0.01 | 0.27 | 0.27 | 0.17 | 0.03 | 0.26 |
| 670 | 2 | 96 | 90 | 37  | 16 | 88 | 0.01 | 0.29 | 0.27 | 0.11 | 0.05 | 0.27 |
| 671 | 1 | 89 | 80 | 19  | 25 | 84 | 0.00 | 0.30 | 0.27 | 0.06 | 0.08 | 0.28 |
| 672 | 1 | 77 | 67 | 9   | 38 | 80 | 0.00 | 0.28 | 0.25 | 0.03 | 0.14 | 0.29 |
| 673 | 2 | 64 | 53 | 2   | 46 | 74 | 0.01 | 0.27 | 0.22 | 0.01 | 0.19 | 0.31 |
| 674 | 1 | 51 | 37 | 1   | 54 | 47 | 0.01 | 0.27 | 0.19 | 0.01 | 0.28 | 0.25 |
| 675 | 2 | 35 | 24 | 1   | 14 | 57 | 0.02 | 0.26 | 0.18 | 0.01 | 0.11 | 0.43 |
| 676 | 2 | 22 | 12 | 1   | 4  | 50 | 0.02 | 0.24 | 0.13 | 0.01 | 0.04 | 0.55 |
| 677 | 1 | 10 | 4  | 10  | 54 | 0  | 0.01 | 0.13 | 0.05 | 0.13 | 0.68 | 0.00 |
| 678 | 1 | 1  | 1  | 1   | 58 | 30 | 0.01 | 0.01 | 0.01 | 0.01 | 0.63 | 0.33 |
| 679 | 1 | 1  | 1  | 1   | 66 | 67 | 0.01 | 0.01 | 0.01 | 0.01 | 0.48 | 0.49 |
| 680 | 1 | 2  | 6  | 3   | 75 | 52 | 0.01 | 0.01 | 0.04 | 0.02 | 0.54 | 0.37 |
| 681 | 2 | 3  | 15 | 13  | 81 | 42 | 0.01 | 0.02 | 0.10 | 0.08 | 0.52 | 0.27 |
| 682 | 1 | 8  | 30 | 22  | 85 | 25 | 0.01 | 0.05 | 0.18 | 0.13 | 0.50 | 0.15 |
| 683 | 1 | 19 | 44 | 44  | 90 | 16 | 0.00 | 0.09 | 0.21 | 0.21 | 0.42 | 0.07 |
| 684 | 1 | 33 | 58 | 67  | 93 | 12 | 0.00 | 0.13 | 0.22 | 0.25 | 0.35 | 0.05 |
| 685 | 2 | 48 | 72 | 87  | 93 | 1  | 0.01 | 0.16 | 0.24 | 0.29 | 0.31 | 0.00 |
| 686 | 2 | 63 | 84 | 98  | 91 | 6  | 0.01 | 0.18 | 0.24 | 0.28 | 0.26 | 0.02 |
| 687 | 2 | 77 | 92 | 100 | 88 | 10 | 0.01 | 0.21 | 0.25 | 0.27 | 0.24 | 0.03 |
| 688 | 2 | 88 | 96 | 100 | 85 | 6  | 0.01 | 0.23 | 0.25 | 0.27 | 0.23 | 0.02 |
| 689 | 2 | 95 | 97 | 98  | 83 | 1  | 0.01 | 0.25 | 0.26 | 0.26 | 0.22 | 0.00 |
| 690 | 2 | 97 | 95 | 86  | 78 | 1  | 0.01 | 0.27 | 0.26 | 0.24 | 0.22 | 0.00 |
| 691 | 2 | 97 | 88 | 66  | 73 | 1  | 0.01 | 0.30 | 0.27 | 0.20 | 0.22 | 0.00 |
| 692 | 2 | 91 | 78 | 45  | 66 | 1  | 0.01 | 0.32 | 0.28 | 0.16 | 0.23 | 0.00 |
| 693 | 2 | 81 | 65 | 36  | 57 | 4  | 0.01 | 0.33 | 0.27 | 0.15 | 0.23 | 0.02 |
| 694 | 2 | 68 | 50 | 10  | 48 | 4  | 0.01 | 0.37 | 0.27 | 0.05 | 0.26 | 0.02 |
| 695 | 2 | 56 | 37 | 2   | 39 | 7  | 0.01 | 0.39 | 0.26 | 0.01 | 0.27 | 0.05 |
| 696 | 3 | 39 | 23 | 1   | 29 | 25 | 0.03 | 0.33 | 0.19 | 0.01 | 0.24 | 0.21 |
| 697 | 2 | 25 | 12 | 1   | 20 | 34 | 0.02 | 0.27 | 0.13 | 0.01 | 0.21 | 0.36 |
| 698 | 0 | 12 | 4  | 4   | 13 | 12 | 0.00 | 0.27 | 0.09 | 0.09 | 0.29 | 0.27 |

|     |    |    |    |     |    |    |      |      |      |      |      |      |
|-----|----|----|----|-----|----|----|------|------|------|------|------|------|
| 699 | 2  | 2  | 8  | 14  | 6  | 52 | 0.02 | 0.02 | 0.10 | 0.17 | 0.07 | 0.62 |
| 700 | 2  | 3  | 19 | 29  | 3  | 62 | 0.02 | 0.03 | 0.16 | 0.25 | 0.03 | 0.53 |
| 701 | 3  | 6  | 33 | 47  | 2  | 70 | 0.02 | 0.04 | 0.20 | 0.29 | 0.01 | 0.43 |
| 702 | 3  | 17 | 47 | 66  | 2  | 77 | 0.01 | 0.08 | 0.22 | 0.31 | 0.01 | 0.36 |
| 703 | 5  | 30 | 62 | 77  | 6  | 81 | 0.02 | 0.11 | 0.24 | 0.30 | 0.02 | 0.31 |
| 704 | 5  | 45 | 75 | 79  | 10 | 84 | 0.02 | 0.15 | 0.25 | 0.27 | 0.03 | 0.28 |
| 705 | 5  | 60 | 87 | 79  | 13 | 87 | 0.02 | 0.18 | 0.26 | 0.24 | 0.04 | 0.26 |
| 706 | 5  | 74 | 94 | 80  | 14 | 89 | 0.01 | 0.21 | 0.26 | 0.22 | 0.04 | 0.25 |
| 707 | 5  | 85 | 96 | 79  | 15 | 92 | 0.01 | 0.23 | 0.26 | 0.21 | 0.04 | 0.25 |
| 708 | 5  | 96 | 98 | 77  | 15 | 96 | 0.01 | 0.25 | 0.25 | 0.20 | 0.04 | 0.25 |
| 709 | 6  | 98 | 91 | 56  | 19 | 94 | 0.02 | 0.27 | 0.25 | 0.15 | 0.05 | 0.26 |
| 710 | 6  | 97 | 84 | 32  | 25 | 29 | 0.02 | 0.36 | 0.31 | 0.12 | 0.09 | 0.11 |
| 711 | 6  | 95 | 71 | 18  | 40 | 93 | 0.02 | 0.29 | 0.22 | 0.06 | 0.12 | 0.29 |
| 712 | 6  | 95 | 57 | 9   | 52 | 95 | 0.02 | 0.30 | 0.18 | 0.03 | 0.17 | 0.30 |
| 713 | 6  | 73 | 43 | 2   | 60 | 88 | 0.02 | 0.27 | 0.16 | 0.01 | 0.22 | 0.32 |
| 714 | 8  | 56 | 22 | 42  | 1  | 44 | 0.05 | 0.32 | 0.13 | 0.24 | 0.01 | 0.25 |
| 715 | 7  | 56 | 16 | 1   | 71 | 83 | 0.03 | 0.24 | 0.07 | 0.00 | 0.30 | 0.35 |
| 716 | 7  | 31 | 6  | 1   | 59 | 73 | 0.04 | 0.18 | 0.03 | 0.01 | 0.33 | 0.41 |
| 717 | 9  | 18 | 3  | 1   | 5  | 66 | 0.09 | 0.18 | 0.03 | 0.01 | 0.05 | 0.65 |
| 718 | 8  | 7  | 2  | 2   | 64 | 5  | 0.09 | 0.08 | 0.02 | 0.02 | 0.73 | 0.06 |
| 719 | 7  | 2  | 4  | 1   | 72 | 79 | 0.04 | 0.01 | 0.02 | 0.01 | 0.44 | 0.48 |
| 720 | 8  | 2  | 12 | 1   | 78 | 80 | 0.04 | 0.01 | 0.07 | 0.01 | 0.43 | 0.44 |
| 721 | 8  | 1  | 23 | 2   | 85 | 70 | 0.04 | 0.01 | 0.12 | 0.01 | 0.45 | 0.37 |
| 722 | 8  | 3  | 37 | 11  | 90 | 60 | 0.04 | 0.01 | 0.18 | 0.05 | 0.43 | 0.29 |
| 723 | 8  | 12 | 51 | 21  | 93 | 45 | 0.03 | 0.05 | 0.22 | 0.09 | 0.40 | 0.20 |
| 724 | 8  | 24 | 65 | 34  | 93 | 24 | 0.03 | 0.10 | 0.26 | 0.14 | 0.38 | 0.10 |
| 725 | 8  | 39 | 77 | 62  | 94 | 21 | 0.03 | 0.13 | 0.26 | 0.21 | 0.31 | 0.07 |
| 726 | 9  | 55 | 88 | 83  | 92 | 17 | 0.03 | 0.16 | 0.26 | 0.24 | 0.27 | 0.05 |
| 727 | 9  | 69 | 95 | 97  | 88 | 93 | 0.02 | 0.15 | 0.21 | 0.22 | 0.20 | 0.21 |
| 728 | 9  | 82 | 95 | 100 | 82 | 14 | 0.02 | 0.21 | 0.25 | 0.26 | 0.21 | 0.04 |
| 729 | 9  | 93 | 95 | 100 | 78 | 10 | 0.02 | 0.24 | 0.25 | 0.26 | 0.20 | 0.03 |
| 730 | 10 | 97 | 91 | 97  | 74 | 8  | 0.03 | 0.26 | 0.24 | 0.26 | 0.20 | 0.02 |
| 731 | 10 | 98 | 81 | 96  | 66 | 2  | 0.03 | 0.28 | 0.23 | 0.27 | 0.19 | 0.01 |
| 732 | 10 | 96 | 70 | 67  | 59 | 1  | 0.03 | 0.32 | 0.23 | 0.22 | 0.19 | 0.00 |
| 733 | 10 | 97 | 56 | 47  | 50 | 1  | 0.04 | 0.37 | 0.21 | 0.18 | 0.19 | 0.00 |
| 734 | 10 | 76 | 41 | 29  | 41 | 1  | 0.05 | 0.38 | 0.21 | 0.15 | 0.21 | 0.01 |
| 735 | 10 | 62 | 27 | 13  | 32 | 2  | 0.07 | 0.42 | 0.18 | 0.09 | 0.22 | 0.01 |
| 736 | 11 | 47 | 15 | 2   | 23 | 7  | 0.10 | 0.45 | 0.14 | 0.02 | 0.22 | 0.07 |
| 737 | 8  | 33 | 6  | 1   | 14 | 14 | 0.11 | 0.43 | 0.08 | 0.01 | 0.18 | 0.18 |
| 738 | 2  | 18 | 3  | 2   | 7  | 20 | 0.04 | 0.35 | 0.06 | 0.04 | 0.13 | 0.38 |
| 739 | 2  | 3  | 13 | 3   | 4  | 27 | 0.04 | 0.06 | 0.25 | 0.06 | 0.08 | 0.52 |
| 740 | 1  | 3  | 26 | 14  | 2  | 36 | 0.01 | 0.04 | 0.32 | 0.17 | 0.02 | 0.44 |
| 741 | 12 | 2  | 41 | 30  | 2  | 46 | 0.09 | 0.02 | 0.31 | 0.23 | 0.02 | 0.35 |
| 742 | 17 | 9  | 55 | 48  | 2  | 55 | 0.09 | 0.05 | 0.30 | 0.26 | 0.01 | 0.30 |

|     |    |    |    |     |    |    |      |      |      |      |      |      |
|-----|----|----|----|-----|----|----|------|------|------|------|------|------|
| 743 | 15 | 21 | 67 | 67  | 1  | 64 | 0.06 | 0.09 | 0.29 | 0.29 | 0.00 | 0.27 |
| 744 | 15 | 34 | 80 | 78  | 5  | 70 | 0.05 | 0.12 | 0.28 | 0.28 | 0.02 | 0.25 |
| 745 | 15 | 49 | 90 | 80  | 11 | 84 | 0.05 | 0.15 | 0.27 | 0.24 | 0.03 | 0.26 |
| 746 | 15 | 65 | 96 | 81  | 15 | 78 | 0.04 | 0.19 | 0.27 | 0.23 | 0.04 | 0.22 |
| 747 | 15 | 78 | 96 | 81  | 18 | 82 | 0.04 | 0.21 | 0.26 | 0.22 | 0.05 | 0.22 |
| 748 | 15 | 89 | 93 | 91  | 19 | 91 | 0.04 | 0.22 | 0.23 | 0.23 | 0.05 | 0.23 |
| 749 | 16 | 97 | 87 | 77  | 21 | 92 | 0.04 | 0.25 | 0.22 | 0.20 | 0.05 | 0.24 |
| 750 | 16 | 98 | 74 | 49  | 23 | 90 | 0.05 | 0.28 | 0.21 | 0.14 | 0.07 | 0.26 |
| 751 | 16 | 97 | 61 | 28  | 38 | 92 | 0.05 | 0.29 | 0.18 | 0.08 | 0.11 | 0.28 |
| 752 | 16 | 91 | 47 | 18  | 55 | 96 | 0.05 | 0.28 | 0.15 | 0.06 | 0.17 | 0.30 |
| 753 | 16 | 80 | 31 | 9   | 66 | 97 | 0.05 | 0.27 | 0.10 | 0.03 | 0.22 | 0.32 |
| 754 | 16 | 67 | 18 | 1   | 74 | 97 | 0.06 | 0.25 | 0.07 | 0.00 | 0.27 | 0.36 |
| 755 | 19 | 54 | 9  | 0   | 80 | 94 | 0.07 | 0.21 | 0.04 | 0.00 | 0.31 | 0.37 |
| 756 | 21 | 39 | 3  | 1   | 89 | 91 | 0.09 | 0.16 | 0.01 | 0.00 | 0.36 | 0.37 |
| 757 | 22 | 25 | 2  | 0   | 43 | 79 | 0.13 | 0.15 | 0.01 | 0.00 | 0.25 | 0.46 |
| 758 | 22 | 13 | 3  | 1   | 76 | 63 | 0.12 | 0.07 | 0.02 | 0.01 | 0.43 | 0.35 |
| 759 | 22 | 4  | 9  | 1   | 81 | 97 | 0.10 | 0.02 | 0.04 | 0.00 | 0.38 | 0.45 |
| 760 | 21 | 1  | 18 | 1   | 88 | 91 | 0.10 | 0.00 | 0.08 | 0.00 | 0.40 | 0.41 |
| 761 | 22 | 2  | 30 | 1   | 93 | 86 | 0.09 | 0.01 | 0.13 | 0.00 | 0.40 | 0.37 |
| 762 | 22 | 1  | 44 | 10  | 96 | 77 | 0.09 | 0.00 | 0.18 | 0.04 | 0.38 | 0.31 |
| 763 | 22 | 5  | 59 | 20  | 96 | 62 | 0.08 | 0.02 | 0.22 | 0.08 | 0.36 | 0.23 |
| 764 | 21 | 15 | 71 | 27  | 92 | 38 | 0.08 | 0.06 | 0.27 | 0.10 | 0.35 | 0.14 |
| 765 | 18 | 26 | 82 | 49  | 87 | 23 | 0.06 | 0.09 | 0.29 | 0.17 | 0.31 | 0.08 |
| 766 | 18 | 42 | 90 | 77  | 82 | 21 | 0.05 | 0.13 | 0.27 | 0.23 | 0.25 | 0.06 |
| 767 | 18 | 58 | 95 | 96  | 75 | 19 | 0.05 | 0.16 | 0.26 | 0.27 | 0.21 | 0.05 |
| 768 | 18 | 73 | 96 | 100 | 70 | 16 | 0.05 | 0.20 | 0.26 | 0.27 | 0.19 | 0.04 |
| 769 | 19 | 85 | 92 | 100 | 67 | 21 | 0.05 | 0.22 | 0.24 | 0.26 | 0.17 | 0.05 |
| 770 | 19 | 95 | 83 | 98  | 60 | 9  | 0.05 | 0.26 | 0.23 | 0.27 | 0.16 | 0.02 |
| 771 | 19 | 97 | 72 | 87  | 51 | 5  | 0.06 | 0.29 | 0.22 | 0.26 | 0.15 | 0.02 |
| 772 | 20 | 97 | 58 | 67  | 43 | 2  | 0.07 | 0.34 | 0.20 | 0.23 | 0.15 | 0.01 |
| 773 | 20 | 92 | 43 | 47  | 34 | 1  | 0.08 | 0.39 | 0.18 | 0.20 | 0.14 | 0.00 |
| 774 | 20 | 82 | 29 | 29  | 26 | 0  | 0.11 | 0.44 | 0.16 | 0.16 | 0.14 | 0.00 |
| 775 | 22 | 70 | 16 | 13  | 17 | 1  | 0.16 | 0.50 | 0.12 | 0.09 | 0.12 | 0.01 |
| 776 | 26 | 56 | 8  | 2   | 10 | 1  | 0.25 | 0.54 | 0.08 | 0.02 | 0.10 | 0.01 |
| 777 | 18 | 42 | 3  | 2   | 3  | 5  | 0.25 | 0.58 | 0.04 | 0.03 | 0.04 | 0.07 |
| 778 | 2  | 26 | 2  | 2   | 2  | 7  | 0.05 | 0.63 | 0.05 | 0.05 | 0.05 | 0.17 |
| 779 | 2  | 3  | 20 | 3   | 2  | 13 | 0.05 | 0.07 | 0.47 | 0.07 | 0.05 | 0.30 |
| 780 | 1  | 3  | 33 | 15  | 1  | 23 | 0.01 | 0.04 | 0.43 | 0.20 | 0.01 | 0.30 |
| 781 | 22 | 0  | 48 | 31  | 0  | 31 | 0.17 | 0.00 | 0.36 | 0.23 | 0.00 | 0.23 |
| 782 | 34 | 4  | 63 | 19  | 1  | 39 | 0.21 | 0.03 | 0.39 | 0.12 | 0.01 | 0.24 |
| 783 | 30 | 12 | 75 | 69  | 1  | 48 | 0.13 | 0.05 | 0.32 | 0.29 | 0.00 | 0.20 |
| 784 | 27 | 22 | 84 | 80  | 7  | 55 | 0.10 | 0.08 | 0.31 | 0.29 | 0.03 | 0.20 |
| 785 | 24 | 34 | 90 | 82  | 15 | 60 | 0.08 | 0.11 | 0.30 | 0.27 | 0.05 | 0.20 |
| 786 | 22 | 50 | 93 | 83  | 19 | 66 | 0.07 | 0.15 | 0.28 | 0.25 | 0.06 | 0.20 |

---

|     |    |    |    |    |    |    |      |      |      |      |      |      |
|-----|----|----|----|----|----|----|------|------|------|------|------|------|
| 787 | 22 | 66 | 82 | 84 | 21 | 71 | 0.06 | 0.19 | 0.24 | 0.24 | 0.06 | 0.21 |
| 788 | 23 | 80 | 86 | 84 | 22 | 77 | 0.06 | 0.22 | 0.23 | 0.23 | 0.06 | 0.21 |
| 789 | 23 | 91 | 74 | 75 | 23 | 80 | 0.06 | 0.25 | 0.20 | 0.20 | 0.06 | 0.22 |
| 790 | 24 | 96 | 61 | 44 | 35 | 80 | 0.07 | 0.28 | 0.18 | 0.13 | 0.10 | 0.24 |
| 791 | 24 | 96 | 45 | 25 | 52 | 89 | 0.07 | 0.29 | 0.14 | 0.08 | 0.16 | 0.27 |
| 792 | 25 | 94 | 29 | 19 | 70 | 96 | 0.08 | 0.28 | 0.09 | 0.06 | 0.21 | 0.29 |
| 793 | 29 | 86 | 19 | 9  | 78 | 99 | 0.09 | 0.27 | 0.06 | 0.03 | 0.24 | 0.31 |
| 794 | 32 | 75 | 11 | 2  | 81 | 98 | 0.11 | 0.25 | 0.04 | 0.01 | 0.27 | 0.33 |
| 795 | 36 | 63 | 4  | 1  | 86 | 99 | 0.12 | 0.22 | 0.01 | 0.00 | 0.30 | 0.34 |
| 796 | 37 | 48 | 2  | 0  | 91 | 97 | 0.13 | 0.17 | 0.01 | 0.00 | 0.33 | 0.35 |
| 797 | 38 | 34 | 2  | 0  | 93 | 94 | 0.15 | 0.13 | 0.01 | 0.00 | 0.36 | 0.36 |
| 798 | 37 | 20 | 4  | 1  | 88 | 99 | 0.15 | 0.08 | 0.02 | 0.00 | 0.35 | 0.40 |
| 799 | 38 | 8  | 14 | 0  | 92 | 99 | 0.15 | 0.03 | 0.06 | 0.00 | 0.37 | 0.39 |
| 800 | 38 | 1  | 24 | 1  | 95 | 95 | 0.15 | 0.00 | 0.09 | 0.00 | 0.37 | 0.37 |
| 801 | 38 | 1  | 38 | 9  | 97 | 90 | 0.14 | 0.00 | 0.14 | 0.03 | 0.36 | 0.33 |
| 802 | 39 | 1  | 52 | 20 | 95 | 78 | 0.14 | 0.00 | 0.18 | 0.07 | 0.33 | 0.27 |
| 803 | 39 | 2  | 66 | 27 | 88 | 56 | 0.14 | 0.01 | 0.24 | 0.10 | 0.32 | 0.20 |
| 804 | 38 | 8  | 78 | 35 | 74 | 29 | 0.15 | 0.03 | 0.30 | 0.13 | 0.28 | 0.11 |
| 805 | 34 | 16 | 87 | 63 | 59 | 20 | 0.12 | 0.06 | 0.31 | 0.23 | 0.21 | 0.07 |
| 806 | 30 | 27 | 92 | 49 | 45 | 18 | 0.11 | 0.10 | 0.35 | 0.19 | 0.17 | 0.07 |
| 807 | 25 | 41 | 92 | 93 | 44 | 18 | 0.08 | 0.13 | 0.29 | 0.30 | 0.14 | 0.06 |
| 808 | 24 | 58 | 88 | 94 | 42 | 15 | 0.07 | 0.18 | 0.27 | 0.29 | 0.13 | 0.05 |
| 809 | 25 | 73 | 81 | 91 | 35 | 13 | 0.08 | 0.23 | 0.25 | 0.29 | 0.11 | 0.04 |
| 810 | 25 | 86 | 70 | 85 | 29 | 11 | 0.08 | 0.28 | 0.23 | 0.28 | 0.09 | 0.04 |
| 811 | 26 | 94 | 55 | 66 | 25 | 8  | 0.09 | 0.34 | 0.20 | 0.24 | 0.09 | 0.03 |
| 812 | 26 | 96 | 39 | 47 | 18 | 6  | 0.11 | 0.41 | 0.17 | 0.20 | 0.08 | 0.03 |
| 813 | 30 | 95 | 26 | 28 | 12 | 4  | 0.15 | 0.49 | 0.13 | 0.14 | 0.06 | 0.02 |
| 814 | 35 | 88 | 17 | 12 | 6  | 2  | 0.22 | 0.55 | 0.11 | 0.08 | 0.04 | 0.01 |
| 815 | 39 | 78 | 10 | 2  | 1  | 1  | 0.30 | 0.60 | 0.08 | 0.02 | 0.01 | 0.01 |
| 816 | 44 | 65 | 4  | 1  | 2  | 1  | 0.38 | 0.56 | 0.03 | 0.01 | 0.02 | 0.01 |
| 817 | 30 | 51 | 1  | 1  | 0  | 1  | 0.36 | 0.61 | 0.01 | 0.01 | 0.00 | 0.01 |
| 818 | 1  | 35 | 2  | 3  | 2  | 5  | 0.02 | 0.73 | 0.04 | 0.06 | 0.04 | 0.10 |
| 819 | 1  | 3  | 29 | 15 | 1  | 11 | 0.02 | 0.05 | 0.48 | 0.25 | 0.02 | 0.18 |
| 820 | 1  | 2  | 42 | 31 | 1  | 17 | 0.01 | 0.02 | 0.45 | 0.33 | 0.01 | 0.18 |
| 821 | 35 | 0  | 59 | 50 | 2  | 25 | 0.20 | 0.00 | 0.35 | 0.29 | 0.01 | 0.15 |
| 822 | 51 | 2  | 70 | 70 | 6  | 33 | 0.22 | 0.01 | 0.30 | 0.30 | 0.03 | 0.14 |
| 823 | 49 | 7  | 82 | 83 | 13 | 38 | 0.18 | 0.03 | 0.30 | 0.31 | 0.05 | 0.14 |
| 824 | 46 | 15 | 90 | 85 | 19 | 43 | 0.15 | 0.05 | 0.30 | 0.29 | 0.06 | 0.14 |
| 825 | 39 | 21 | 92 | 86 | 22 | 48 | 0.13 | 0.07 | 0.30 | 0.28 | 0.07 | 0.16 |
| 826 | 35 | 34 | 91 | 86 | 24 | 43 | 0.11 | 0.11 | 0.29 | 0.27 | 0.08 | 0.14 |
| 827 | 30 | 49 | 83 | 86 | 25 | 60 | 0.09 | 0.15 | 0.25 | 0.26 | 0.08 | 0.18 |
| 828 | 29 | 65 | 70 | 67 | 27 | 62 | 0.09 | 0.20 | 0.22 | 0.21 | 0.08 | 0.19 |
| 829 | 27 | 79 | 54 | 40 | 48 | 68 | 0.09 | 0.25 | 0.17 | 0.13 | 0.15 | 0.22 |
| 830 | 38 | 90 | 37 | 25 | 68 | 80 | 0.11 | 0.27 | 0.11 | 0.07 | 0.20 | 0.24 |

---



|     |    |    |    |    |    |    |      |      |      |      |      |      |
|-----|----|----|----|----|----|----|------|------|------|------|------|------|
| 831 | 36 | 95 | 27 | 19 | 82 | 93 | 0.10 | 0.27 | 0.08 | 0.05 | 0.23 | 0.26 |
| 832 | 46 | 96 | 22 | 9  | 87 | 98 | 0.13 | 0.27 | 0.06 | 0.03 | 0.24 | 0.27 |
| 833 | 50 | 92 | 15 | 2  | 88 | 98 | 0.14 | 0.27 | 0.04 | 0.01 | 0.26 | 0.28 |
| 834 | 52 | 83 | 7  | 0  | 89 | 99 | 0.16 | 0.25 | 0.02 | 0.00 | 0.27 | 0.30 |
| 835 | 53 | 71 | 3  | 1  | 92 | 99 | 0.17 | 0.22 | 0.01 | 0.00 | 0.29 | 0.31 |
| 836 | 54 | 57 | 2  | 1  | 93 | 99 | 0.18 | 0.19 | 0.01 | 0.00 | 0.30 | 0.32 |
| 837 | 54 | 42 | 3  | 1  | 88 | 98 | 0.19 | 0.15 | 0.01 | 0.00 | 0.31 | 0.34 |
| 838 | 53 | 27 | 8  | 1  | 91 | 99 | 0.19 | 0.10 | 0.03 | 0.00 | 0.33 | 0.35 |
| 839 | 54 | 13 | 18 | 1  | 92 | 99 | 0.19 | 0.05 | 0.06 | 0.00 | 0.33 | 0.36 |
| 840 | 54 | 4  | 31 | 1  | 93 | 99 | 0.19 | 0.01 | 0.11 | 0.00 | 0.33 | 0.35 |
| 841 | 55 | 1  | 46 | 9  | 95 | 96 | 0.18 | 0.00 | 0.15 | 0.03 | 0.31 | 0.32 |
| 842 | 55 | 2  | 60 | 19 | 89 | 89 | 0.18 | 0.01 | 0.19 | 0.06 | 0.28 | 0.28 |
| 843 | 55 | 1  | 73 | 26 | 78 | 70 | 0.18 | 0.00 | 0.24 | 0.09 | 0.26 | 0.23 |
| 844 | 56 | 4  | 85 | 37 | 60 | 52 | 0.19 | 0.01 | 0.29 | 0.13 | 0.20 | 0.18 |
| 845 | 55 | 12 | 93 | 64 | 41 | 46 | 0.18 | 0.04 | 0.30 | 0.21 | 0.13 | 0.15 |
| 846 | 50 | 19 | 94 | 86 | 27 | 43 | 0.16 | 0.06 | 0.29 | 0.27 | 0.08 | 0.13 |
| 847 | 43 | 25 | 91 | 88 | 27 | 29 | 0.14 | 0.08 | 0.30 | 0.29 | 0.09 | 0.10 |
| 848 | 38 | 41 | 82 | 87 | 25 | 33 | 0.12 | 0.13 | 0.27 | 0.28 | 0.08 | 0.11 |
| 849 | 32 | 56 | 67 | 86 | 22 | 29 | 0.11 | 0.19 | 0.23 | 0.29 | 0.08 | 0.10 |
| 850 | 29 | 72 | 48 | 84 | 17 | 27 | 0.10 | 0.26 | 0.17 | 0.30 | 0.06 | 0.10 |
| 851 | 32 | 86 | 30 | 67 | 11 | 22 | 0.13 | 0.35 | 0.12 | 0.27 | 0.04 | 0.09 |
| 852 | 44 | 95 | 25 | 47 | 6  | 17 | 0.19 | 0.41 | 0.11 | 0.20 | 0.03 | 0.07 |
| 853 | 53 | 97 | 22 | 28 | 2  | 11 | 0.25 | 0.46 | 0.10 | 0.13 | 0.01 | 0.05 |
| 854 | 57 | 94 | 16 | 11 | 2  | 6  | 0.31 | 0.51 | 0.09 | 0.06 | 0.01 | 0.03 |
| 855 | 59 | 85 | 8  | 1  | 1  | 2  | 0.38 | 0.54 | 0.05 | 0.01 | 0.01 | 0.01 |
| 856 | 63 | 74 | 2  | 1  | 0  | 1  | 0.45 | 0.52 | 0.01 | 0.01 | 0.00 | 0.01 |
| 857 | 43 | 59 | 2  | 0  | 1  | 0  | 0.41 | 0.56 | 0.02 | 0.00 | 0.01 | 0.00 |
| 858 | 1  | 44 | 2  | 3  | 1  | 1  | 0.02 | 0.85 | 0.04 | 0.06 | 0.02 | 0.02 |
| 859 | 1  | 3  | 39 | 15 | 2  | 3  | 0.02 | 0.05 | 0.62 | 0.24 | 0.03 | 0.05 |
| 860 | 1  | 3  | 50 | 32 | 4  | 7  | 0.01 | 0.03 | 0.52 | 0.33 | 0.04 | 0.07 |
| 861 | 48 | 0  | 65 | 50 | 10 | 11 | 0.26 | 0.00 | 0.35 | 0.27 | 0.05 | 0.06 |
| 862 | 69 | 1  | 77 | 68 | 14 | 16 | 0.28 | 0.00 | 0.31 | 0.28 | 0.06 | 0.07 |
| 863 | 68 | 3  | 88 | 84 | 19 | 21 | 0.24 | 0.01 | 0.31 | 0.30 | 0.07 | 0.07 |
| 864 | 67 | 11 | 96 | 85 | 25 | 22 | 0.22 | 0.04 | 0.31 | 0.28 | 0.08 | 0.07 |
| 865 | 64 | 19 | 96 | 89 | 27 | 26 | 0.20 | 0.06 | 0.30 | 0.28 | 0.08 | 0.08 |
| 866 | 56 | 22 | 91 | 89 | 27 | 31 | 0.18 | 0.07 | 0.29 | 0.28 | 0.09 | 0.10 |
| 867 | 49 | 32 | 78 | 88 | 30 | 37 | 0.16 | 0.10 | 0.25 | 0.28 | 0.10 | 0.12 |
| 868 | 44 | 49 | 61 | 65 | 44 | 40 | 0.15 | 0.16 | 0.20 | 0.21 | 0.15 | 0.13 |
| 869 | 40 | 65 | 38 | 37 | 62 | 48 | 0.14 | 0.22 | 0.13 | 0.13 | 0.21 | 0.17 |
| 870 | 46 | 82 | 22 | 26 | 76 | 68 | 0.14 | 0.26 | 0.07 | 0.08 | 0.24 | 0.21 |
| 871 | 60 | 95 | 24 | 19 | 90 | 87 | 0.16 | 0.25 | 0.06 | 0.05 | 0.24 | 0.23 |
| 872 | 66 | 97 | 20 | 9  | 95 | 96 | 0.17 | 0.25 | 0.05 | 0.02 | 0.25 | 0.25 |
| 873 | 69 | 96 | 12 | 2  | 93 | 98 | 0.19 | 0.26 | 0.03 | 0.01 | 0.25 | 0.26 |
| 874 | 69 | 89 | 6  | 1  | 92 | 99 | 0.19 | 0.25 | 0.02 | 0.00 | 0.26 | 0.28 |

|     |    |    |    |    |    |    |      |      |      |      |      |      |
|-----|----|----|----|----|----|----|------|------|------|------|------|------|
| 875 | 70 | 78 | 3  | 1  | 91 | 99 | 0.20 | 0.23 | 0.01 | 0.00 | 0.27 | 0.29 |
| 876 | 70 | 65 | 2  | 1  | 88 | 99 | 0.22 | 0.20 | 0.01 | 0.00 | 0.27 | 0.30 |
| 877 | 69 | 50 | 4  | 1  | 93 | 99 | 0.22 | 0.16 | 0.01 | 0.00 | 0.29 | 0.31 |
| 878 | 68 | 32 | 10 | 1  | 92 | 99 | 0.23 | 0.11 | 0.03 | 0.00 | 0.30 | 0.33 |
| 879 | 68 | 17 | 23 | 0  | 90 | 99 | 0.23 | 0.06 | 0.08 | 0.00 | 0.30 | 0.33 |
| 880 | 71 | 9  | 39 | 2  | 97 | 99 | 0.22 | 0.03 | 0.12 | 0.01 | 0.31 | 0.31 |
| 881 | 72 | 2  | 54 | 10 | 86 | 98 | 0.22 | 0.01 | 0.17 | 0.03 | 0.27 | 0.30 |
| 882 | 73 | 0  | 68 | 19 | 80 | 94 | 0.22 | 0.00 | 0.20 | 0.06 | 0.24 | 0.28 |
| 883 | 72 | 1  | 80 | 25 | 66 | 82 | 0.22 | 0.00 | 0.25 | 0.08 | 0.20 | 0.25 |
| 884 | 72 | 1  | 90 | 40 | 46 | 70 | 0.23 | 0.00 | 0.28 | 0.13 | 0.14 | 0.22 |
| 885 | 73 | 7  | 96 | 68 | 25 | 66 | 0.22 | 0.02 | 0.29 | 0.20 | 0.07 | 0.20 |
| 886 | 72 | 16 | 97 | 85 | 24 | 65 | 0.20 | 0.04 | 0.27 | 0.24 | 0.07 | 0.18 |
| 887 | 68 | 21 | 93 | 86 | 23 | 95 | 0.18 | 0.05 | 0.24 | 0.22 | 0.06 | 0.25 |
| 888 | 58 | 25 | 78 | 85 | 21 | 53 | 0.18 | 0.08 | 0.24 | 0.27 | 0.07 | 0.17 |
| 889 | 53 | 41 | 60 | 84 | 17 | 98 | 0.15 | 0.12 | 0.17 | 0.24 | 0.05 | 0.28 |
| 890 | 49 | 59 | 37 | 80 | 10 | 44 | 0.18 | 0.21 | 0.13 | 0.29 | 0.04 | 0.16 |
| 891 | 53 | 77 | 20 | 68 | 3  | 38 | 0.20 | 0.30 | 0.08 | 0.26 | 0.01 | 0.15 |
| 892 | 57 | 94 | 24 | 47 | 1  | 29 | 0.23 | 0.37 | 0.10 | 0.19 | 0.00 | 0.12 |
| 893 | 72 | 97 | 19 | 27 | 2  | 12 | 0.31 | 0.42 | 0.08 | 0.12 | 0.01 | 0.05 |
| 894 | 14 | 97 | 12 | 12 | 1  | 15 | 0.09 | 0.64 | 0.08 | 0.08 | 0.01 | 0.10 |
| 895 | 75 | 91 | 5  | 2  | 2  | 8  | 0.41 | 0.50 | 0.03 | 0.01 | 0.01 | 0.04 |
| 896 | 80 | 81 | 2  | 1  | 1  | 4  | 0.47 | 0.48 | 0.01 | 0.01 | 0.01 | 0.02 |
| 897 | 55 | 65 | 2  | 1  | 1  | 2  | 0.44 | 0.52 | 0.02 | 0.01 | 0.01 | 0.02 |
| 898 | 0  | 55 | 5  | 4  | 4  | 2  | 0.00 | 0.79 | 0.07 | 0.06 | 0.06 | 0.03 |
| 899 | 1  | 3  | 51 | 16 | 9  | 1  | 0.01 | 0.04 | 0.63 | 0.20 | 0.11 | 0.01 |
| 900 | 1  | 4  | 58 | 32 | 16 | 1  | 0.01 | 0.04 | 0.52 | 0.29 | 0.14 | 0.01 |
| 901 | 59 | 0  | 72 | 51 | 23 | 1  | 0.29 | 0.00 | 0.35 | 0.25 | 0.11 | 0.00 |
| 902 | 77 | 5  | 82 | 69 | 30 | 5  | 0.29 | 0.02 | 0.31 | 0.26 | 0.11 | 0.02 |
| 903 | 75 | 4  | 92 | 87 | 35 | 5  | 0.25 | 0.01 | 0.31 | 0.29 | 0.12 | 0.02 |
| 904 | 76 | 9  | 96 | 93 | 44 | 11 | 0.23 | 0.03 | 0.29 | 0.28 | 0.13 | 0.03 |
| 905 | 78 | 16 | 97 | 95 | 50 | 14 | 0.22 | 0.05 | 0.28 | 0.27 | 0.14 | 0.04 |
| 906 | 79 | 21 | 92 | 97 | 51 | 16 | 0.22 | 0.06 | 0.26 | 0.27 | 0.14 | 0.04 |
| 907 | 73 | 23 | 76 | 91 | 53 | 17 | 0.22 | 0.07 | 0.23 | 0.27 | 0.16 | 0.05 |
| 908 | 64 | 34 | 55 | 67 | 63 | 18 | 0.21 | 0.11 | 0.18 | 0.22 | 0.21 | 0.06 |
| 909 | 61 | 52 | 31 | 38 | 75 | 26 | 0.22 | 0.18 | 0.11 | 0.13 | 0.27 | 0.09 |
| 910 | 68 | 75 | 19 | 27 | 88 | 52 | 0.21 | 0.23 | 0.06 | 0.08 | 0.27 | 0.16 |
| 911 | 79 | 92 | 22 | 20 | 95 | 74 | 0.21 | 0.24 | 0.06 | 0.05 | 0.25 | 0.19 |
| 912 | 82 | 99 | 16 | 10 | 97 | 88 | 0.21 | 0.25 | 0.04 | 0.03 | 0.25 | 0.22 |
| 913 | 84 | 98 | 9  | 1  | 96 | 95 | 0.22 | 0.26 | 0.02 | 0.00 | 0.25 | 0.25 |
| 914 | 96 | 98 | 7  | 25 | 26 | 1  | 0.38 | 0.39 | 0.03 | 0.10 | 0.10 | 0.00 |
| 915 | 85 | 73 | 4  | 0  | 92 | 98 | 0.24 | 0.21 | 0.01 | 0.00 | 0.26 | 0.28 |
| 916 | 89 | 68 | 8  | 6  | 59 | 95 | 0.27 | 0.21 | 0.02 | 0.02 | 0.18 | 0.29 |
| 917 | 80 | 37 | 12 | 1  | 88 | 98 | 0.25 | 0.12 | 0.04 | 0.00 | 0.28 | 0.31 |
| 918 | 82 | 21 | 27 | 0  | 83 | 98 | 0.26 | 0.07 | 0.09 | 0.00 | 0.27 | 0.32 |

|     |    |    |    |     |    |    |      |      |      |      |      |      |
|-----|----|----|----|-----|----|----|------|------|------|------|------|------|
| 919 | 83 | 15 | 48 | 1   | 85 | 73 | 0.27 | 0.05 | 0.16 | 0.00 | 0.28 | 0.24 |
| 920 | 78 | 5  | 73 | 1   | 2  | 40 | 0.39 | 0.03 | 0.37 | 0.01 | 0.01 | 0.20 |
| 921 | 77 | 5  | 84 | 1   | 3  | 33 | 0.38 | 0.02 | 0.41 | 0.00 | 0.01 | 0.16 |
| 922 | 76 | 6  | 93 | 2   | 42 | 10 | 0.33 | 0.03 | 0.41 | 0.01 | 0.18 | 0.04 |
| 923 | 76 | 9  | 96 | 11  | 6  | 51 | 0.31 | 0.04 | 0.39 | 0.04 | 0.02 | 0.20 |
| 924 | 78 | 14 | 96 | 25  | 3  | 60 | 0.28 | 0.05 | 0.35 | 0.09 | 0.01 | 0.22 |
| 925 | 81 | 20 | 91 | 43  | 3  | 68 | 0.26 | 0.07 | 0.30 | 0.14 | 0.01 | 0.22 |
| 926 | 81 | 23 | 78 | 63  | 3  | 75 | 0.25 | 0.07 | 0.24 | 0.20 | 0.01 | 0.23 |
| 927 | 73 | 26 | 56 | 76  | 4  | 81 | 0.23 | 0.08 | 0.18 | 0.24 | 0.01 | 0.26 |
| 928 | 69 | 46 | 32 | 79  | 10 | 83 | 0.22 | 0.14 | 0.10 | 0.25 | 0.03 | 0.26 |
| 929 | 73 | 70 | 19 | 79  | 13 | 86 | 0.21 | 0.21 | 0.06 | 0.23 | 0.04 | 0.25 |
| 930 | 84 | 90 | 21 | 80  | 14 | 89 | 0.22 | 0.24 | 0.06 | 0.21 | 0.04 | 0.24 |
| 931 | 87 | 97 | 16 | 80  | 15 | 92 | 0.22 | 0.25 | 0.04 | 0.21 | 0.04 | 0.24 |
| 932 | 88 | 99 | 10 | 78  | 16 | 94 | 0.23 | 0.26 | 0.03 | 0.20 | 0.04 | 0.24 |
| 933 | 89 | 96 | 2  | 58  | 19 | 95 | 0.25 | 0.27 | 0.01 | 0.16 | 0.05 | 0.26 |
| 934 | 92 | 88 | 1  | 32  | 25 | 93 | 0.28 | 0.27 | 0.00 | 0.10 | 0.08 | 0.28 |
| 935 | 71 | 74 | 3  | 18  | 40 | 94 | 0.24 | 0.25 | 0.01 | 0.06 | 0.13 | 0.31 |
| 936 | 8  | 69 | 3  | 9   | 53 | 94 | 0.03 | 0.29 | 0.01 | 0.04 | 0.22 | 0.40 |
| 937 | 1  | 5  | 68 | 1   | 61 | 91 | 0.00 | 0.02 | 0.30 | 0.00 | 0.27 | 0.40 |
| 938 | 60 | 1  | 78 | 1   | 68 | 86 | 0.20 | 0.00 | 0.27 | 0.00 | 0.23 | 0.29 |
| 939 | 79 | 10 | 86 | 1   | 75 | 79 | 0.24 | 0.03 | 0.26 | 0.00 | 0.23 | 0.24 |
| 940 | 77 | 9  | 94 | 2   | 82 | 71 | 0.23 | 0.03 | 0.28 | 0.01 | 0.24 | 0.21 |
| 941 | 77 | 10 | 96 | 9   | 88 | 61 | 0.23 | 0.03 | 0.28 | 0.03 | 0.26 | 0.18 |
| 942 | 79 | 15 | 94 | 19  | 92 | 47 | 0.23 | 0.04 | 0.27 | 0.05 | 0.27 | 0.14 |
| 943 | 82 | 19 | 97 | 30  | 82 | 26 | 0.24 | 0.06 | 0.29 | 0.09 | 0.24 | 0.08 |
| 944 | 84 | 23 | 73 | 55  | 91 | 11 | 0.25 | 0.07 | 0.22 | 0.16 | 0.27 | 0.03 |
| 945 | 83 | 25 | 53 | 79  | 92 | 17 | 0.24 | 0.07 | 0.15 | 0.23 | 0.26 | 0.05 |
| 946 | 79 | 41 | 27 | 95  | 90 | 13 | 0.23 | 0.12 | 0.08 | 0.28 | 0.26 | 0.04 |
| 947 | 85 | 69 | 18 | 100 | 85 | 13 | 0.23 | 0.19 | 0.05 | 0.27 | 0.23 | 0.04 |
| 948 | 91 | 88 | 18 | 100 | 80 | 12 | 0.23 | 0.23 | 0.05 | 0.26 | 0.21 | 0.03 |
| 949 | 93 | 97 | 10 | 100 | 77 | 6  | 0.24 | 0.25 | 0.03 | 0.26 | 0.20 | 0.02 |
| 950 | 84 | 98 | 6  | 93  | 69 | 1  | 0.24 | 0.28 | 0.02 | 0.26 | 0.20 | 0.00 |
| 951 | 94 | 97 | 4  | 79  | 64 | 1  | 0.28 | 0.29 | 0.01 | 0.23 | 0.19 | 0.00 |
| 952 | 94 | 91 | 3  | 55  | 56 | 1  | 0.31 | 0.30 | 0.01 | 0.18 | 0.19 | 0.00 |
| 953 | 93 | 81 | 7  | 37  | 47 | 1  | 0.35 | 0.30 | 0.03 | 0.14 | 0.18 | 0.00 |
| 954 | 82 | 67 | 12 | 19  | 39 | 2  | 0.37 | 0.30 | 0.05 | 0.09 | 0.18 | 0.01 |
| 955 | 89 | 41 | 14 | 6   | 30 | 4  | 0.48 | 0.22 | 0.08 | 0.03 | 0.16 | 0.02 |
| 956 | 87 | 15 | 19 | 4   | 19 | 1  | 0.60 | 0.10 | 0.13 | 0.03 | 0.13 | 0.01 |
| 957 | 85 | 20 | 49 | 2   | 12 | 1  | 0.50 | 0.12 | 0.29 | 0.01 | 0.07 | 0.01 |
| 958 | 82 | 15 | 66 | 2   | 9  | 1  | 0.47 | 0.09 | 0.38 | 0.01 | 0.05 | 0.01 |
| 959 | 79 | 10 | 78 | 1   | 1  | 1  | 0.46 | 0.06 | 0.46 | 0.01 | 0.01 | 0.01 |
| 960 | 78 | 9  | 88 | 11  | 2  | 4  | 0.41 | 0.05 | 0.46 | 0.06 | 0.01 | 0.02 |
| 961 | 77 | 10 | 95 | 28  | 2  | 7  | 0.35 | 0.05 | 0.43 | 0.13 | 0.01 | 0.03 |
| 962 | 77 | 10 | 96 | 46  | 11 | 10 | 0.31 | 0.04 | 0.38 | 0.18 | 0.04 | 0.04 |

|      |    |    |    |    |    |    |      |      |      |      |      |      |
|------|----|----|----|----|----|----|------|------|------|------|------|------|
| 963  | 78 | 13 | 94 | 64 | 15 | 15 | 0.28 | 0.05 | 0.34 | 0.23 | 0.05 | 0.05 |
| 964  | 81 | 18 | 86 | 83 | 19 | 20 | 0.26 | 0.06 | 0.28 | 0.27 | 0.06 | 0.07 |
| 965  | 84 | 22 | 73 | 88 | 25 | 22 | 0.27 | 0.07 | 0.23 | 0.28 | 0.08 | 0.07 |
| 966  | 86 | 25 | 54 | 89 | 28 | 24 | 0.28 | 0.08 | 0.18 | 0.29 | 0.09 | 0.08 |
| 967  | 85 | 35 | 30 | 89 | 30 | 29 | 0.29 | 0.12 | 0.10 | 0.30 | 0.10 | 0.10 |
| 968  | 87 | 63 | 17 | 88 | 32 | 33 | 0.27 | 0.20 | 0.05 | 0.28 | 0.10 | 0.10 |
| 969  | 93 | 85 | 17 | 67 | 44 | 38 | 0.27 | 0.25 | 0.05 | 0.19 | 0.13 | 0.11 |
| 970  | 95 | 96 | 10 | 38 | 63 | 45 | 0.27 | 0.28 | 0.03 | 0.11 | 0.18 | 0.13 |
| 971  | 96 | 98 | 7  | 25 | 26 | 1  | 0.38 | 0.39 | 0.03 | 0.10 | 0.10 | 0.00 |
| 972  | 96 | 97 | 5  | 26 | 79 | 66 | 0.26 | 0.26 | 0.01 | 0.07 | 0.21 | 0.18 |
| 973  | 96 | 92 | 3  | 19 | 90 | 85 | 0.25 | 0.24 | 0.01 | 0.05 | 0.23 | 0.22 |
| 974  | 95 | 84 | 2  | 9  | 95 | 94 | 0.25 | 0.22 | 0.01 | 0.02 | 0.25 | 0.25 |
| 975  | 0  | 7  | 79 | 1  | 93 | 98 | 0.00 | 0.03 | 0.28 | 0.00 | 0.33 | 0.35 |
| 976  | 57 | 1  | 86 | 1  | 92 | 99 | 0.17 | 0.00 | 0.26 | 0.00 | 0.27 | 0.29 |
| 977  | 79 | 13 | 89 | 1  | 90 | 99 | 0.21 | 0.04 | 0.24 | 0.00 | 0.24 | 0.27 |
| 978  | 77 | 11 | 95 | 1  | 89 | 99 | 0.21 | 0.03 | 0.26 | 0.00 | 0.24 | 0.27 |
| 979  | 77 | 1  | 95 | 7  | 88 | 98 | 0.21 | 0.00 | 0.26 | 0.02 | 0.24 | 0.27 |
| 980  | 79 | 13 | 91 | 17 | 85 | 95 | 0.21 | 0.03 | 0.24 | 0.04 | 0.22 | 0.25 |
| 981  | 81 | 17 | 81 | 24 | 73 | 86 | 0.22 | 0.05 | 0.22 | 0.07 | 0.20 | 0.24 |
| 982  | 84 | 21 | 67 | 33 | 54 | 70 | 0.26 | 0.06 | 0.20 | 0.10 | 0.16 | 0.21 |
| 983  | 87 | 24 | 48 | 59 | 33 | 63 | 0.28 | 0.08 | 0.15 | 0.19 | 0.11 | 0.20 |
| 984  | 88 | 34 | 25 | 84 | 25 | 63 | 0.28 | 0.11 | 0.08 | 0.26 | 0.08 | 0.20 |
| 985  | 82 | 64 | 17 | 86 | 24 | 58 | 0.25 | 0.19 | 0.05 | 0.26 | 0.07 | 0.18 |
| 986  | 95 | 83 | 14 | 86 | 23 | 53 | 0.27 | 0.23 | 0.04 | 0.24 | 0.06 | 0.15 |
| 987  | 97 | 94 | 7  | 85 | 20 | 47 | 0.28 | 0.27 | 0.02 | 0.24 | 0.06 | 0.13 |
| 988  | 96 | 97 | 6  | 83 | 15 | 43 | 0.28 | 0.29 | 0.02 | 0.24 | 0.04 | 0.13 |
| 989  | 97 | 97 | 5  | 75 | 7  | 38 | 0.30 | 0.30 | 0.02 | 0.24 | 0.02 | 0.12 |
| 990  | 96 | 95 | 6  | 54 | 3  | 32 | 0.34 | 0.33 | 0.02 | 0.19 | 0.01 | 0.11 |
| 991  | 96 | 87 | 10 | 36 | 1  | 15 | 0.39 | 0.36 | 0.04 | 0.15 | 0.00 | 0.06 |
| 992  | 94 | 74 | 15 | 19 | 1  | 2  | 0.46 | 0.36 | 0.07 | 0.09 | 0.00 | 0.01 |
| 993  | 90 | 47 | 17 | 6  | 2  | 2  | 0.55 | 0.29 | 0.10 | 0.04 | 0.01 | 0.01 |
| 994  | 88 | 27 | 33 | 1  | 0  | 0  | 0.59 | 0.18 | 0.22 | 0.01 | 0.00 | 0.00 |
| 995  | 86 | 23 | 54 | 2  | 1  | 1  | 0.51 | 0.14 | 0.32 | 0.01 | 0.01 | 0.01 |
| 996  | 83 | 79 | 71 | 11 | 2  | 2  | 0.33 | 0.32 | 0.29 | 0.04 | 0.01 | 0.01 |
| 997  | 80 | 15 | 83 | 27 | 1  | 3  | 0.38 | 0.07 | 0.40 | 0.13 | 0.00 | 0.01 |
| 998  | 78 | 11 | 92 | 47 | 20 | 2  | 0.31 | 0.04 | 0.37 | 0.19 | 0.08 | 0.01 |
| 999  | 77 | 1  | 96 | 65 | 33 | 4  | 0.28 | 0.00 | 0.35 | 0.24 | 0.12 | 0.01 |
| 1000 | 77 | 11 | 95 | 84 | 37 | 8  | 0.25 | 0.04 | 0.30 | 0.27 | 0.12 | 0.03 |
| 1001 | 78 | 11 | 90 | 94 | 45 | 11 | 0.24 | 0.03 | 0.27 | 0.29 | 0.14 | 0.03 |
| 1002 | 81 | 14 | 80 | 95 | 51 | 14 | 0.24 | 0.04 | 0.24 | 0.28 | 0.15 | 0.04 |
| 1003 | 84 | 20 | 66 | 97 | 53 | 6  | 0.26 | 0.06 | 0.20 | 0.30 | 0.16 | 0.02 |
| 1004 | 86 | 23 | 49 | 96 | 55 | 18 | 0.26 | 0.07 | 0.15 | 0.29 | 0.17 | 0.06 |
| 1005 | 88 | 30 | 27 | 70 | 64 | 18 | 0.30 | 0.10 | 0.09 | 0.24 | 0.22 | 0.06 |
| 1006 | 92 | 57 | 16 | 40 | 75 | 24 | 0.30 | 0.19 | 0.05 | 0.13 | 0.25 | 0.08 |

|      |    |    |    |     |    |     |      |      |      |      |      |      |
|------|----|----|----|-----|----|-----|------|------|------|------|------|------|
| 1007 | 96 | 79 | 14 | 27  | 88 | 48  | 0.27 | 0.22 | 0.04 | 0.08 | 0.25 | 0.14 |
| 1008 | 96 | 91 | 7  | 20  | 95 | 72  | 0.25 | 0.24 | 0.02 | 0.05 | 0.25 | 0.19 |
| 1009 | 96 | 97 | 5  | 9   | 97 | 86  | 0.25 | 0.25 | 0.01 | 0.02 | 0.25 | 0.22 |
| 1010 | 97 | 97 | 5  | 1   | 96 | 94  | 0.25 | 0.25 | 0.01 | 0.00 | 0.25 | 0.24 |
| 1011 | 96 | 96 | 6  | 0   | 92 | 96  | 0.25 | 0.25 | 0.02 | 0.00 | 0.24 | 0.25 |
| 1012 | 97 | 92 | 4  | 1   | 88 | 94  | 0.26 | 0.24 | 0.01 | 0.00 | 0.23 | 0.25 |
| 1013 | 70 | 3  | 93 | 1   | 83 | 99  | 0.20 | 0.01 | 0.27 | 0.00 | 0.24 | 0.28 |
| 1014 | 78 | 12 | 94 | 7   | 80 | 100 | 0.21 | 0.03 | 0.25 | 0.02 | 0.22 | 0.27 |
| 1015 | 77 | 11 | 96 | 16  | 74 | 97  | 0.21 | 0.03 | 0.26 | 0.04 | 0.20 | 0.26 |
| 1016 | 78 | 11 | 94 | 23  | 59 | 92  | 0.22 | 0.03 | 0.26 | 0.06 | 0.17 | 0.26 |
| 1017 | 78 | 10 | 87 | 37  | 40 | 83  | 0.23 | 0.03 | 0.26 | 0.11 | 0.12 | 0.25 |
| 1018 | 81 | 14 | 75 | 65  | 23 | 79  | 0.24 | 0.04 | 0.22 | 0.19 | 0.07 | 0.23 |
| 1019 | 84 | 18 | 61 | 83  | 23 | 79  | 0.24 | 0.05 | 0.18 | 0.24 | 0.07 | 0.23 |
| 1020 | 86 | 23 | 42 | 84  | 21 | 74  | 0.26 | 0.07 | 0.13 | 0.25 | 0.06 | 0.22 |
| 1021 | 89 | 30 | 23 | 83  | 19 | 67  | 0.29 | 0.10 | 0.07 | 0.27 | 0.06 | 0.22 |
| 1022 | 92 | 57 | 14 | 82  | 16 | 64  | 0.28 | 0.18 | 0.04 | 0.25 | 0.05 | 0.20 |
| 1023 | 95 | 76 | 10 | 91  | 9  | 59  | 0.28 | 0.22 | 0.03 | 0.27 | 0.03 | 0.17 |
| 1024 | 96 | 89 | 5  | 74  | 2  | 54  | 0.30 | 0.28 | 0.02 | 0.23 | 0.01 | 0.17 |
| 1025 | 96 | 95 | 5  | 54  | 1  | 44  | 0.33 | 0.32 | 0.02 | 0.18 | 0.00 | 0.15 |
| 1026 | 96 | 98 | 6  | 36  | 1  | 6   | 0.40 | 0.40 | 0.02 | 0.15 | 0.00 | 0.02 |
| 1027 | 96 | 99 | 8  | 19  | 2  | 2   | 0.42 | 0.44 | 0.04 | 0.08 | 0.01 | 0.01 |
| 1028 | 95 | 92 | 14 | 7   | 2  | 2   | 0.45 | 0.43 | 0.07 | 0.03 | 0.01 | 0.01 |
| 1029 | 90 | 79 | 18 | 12  | 2  | 2   | 0.44 | 0.39 | 0.09 | 0.06 | 0.01 | 0.01 |
| 1030 | 85 | 52 | 16 | 25  | 1  | 2   | 0.47 | 0.29 | 0.09 | 0.14 | 0.01 | 0.01 |
| 1031 | 86 | 30 | 36 | 47  | 11 | 1   | 0.41 | 0.14 | 0.17 | 0.22 | 0.05 | 0.00 |
| 1032 | 96 | 24 | 59 | 65  | 50 | 1   | 0.33 | 0.08 | 0.20 | 0.22 | 0.17 | 0.00 |
| 1033 | 83 | 21 | 76 | 84  | 56 | 2   | 0.26 | 0.07 | 0.24 | 0.26 | 0.17 | 0.01 |
| 1034 | 81 | 17 | 88 | 97  | 63 | 6   | 0.23 | 0.05 | 0.25 | 0.28 | 0.18 | 0.02 |
| 1035 | 79 | 13 | 94 | 99  | 70 | 11  | 0.22 | 0.04 | 0.26 | 0.27 | 0.19 | 0.03 |
| 1036 | 77 | 10 | 96 | 100 | 74 | 15  | 0.21 | 0.03 | 0.26 | 0.27 | 0.20 | 0.04 |
| 1037 | 78 | 10 | 93 | 99  | 79 | 17  | 0.21 | 0.03 | 0.25 | 0.26 | 0.21 | 0.05 |
| 1038 | 78 | 9  | 86 | 83  | 85 | 20  | 0.22 | 0.02 | 0.24 | 0.23 | 0.24 | 0.06 |
| 1039 | 80 | 11 | 74 | 57  | 89 | 22  | 0.24 | 0.03 | 0.22 | 0.17 | 0.27 | 0.07 |
| 1040 | 83 | 16 | 61 | 30  | 92 | 30  | 0.27 | 0.05 | 0.20 | 0.10 | 0.29 | 0.10 |
| 1041 | 86 | 21 | 44 | 21  | 96 | 55  | 0.27 | 0.07 | 0.14 | 0.07 | 0.30 | 0.17 |
| 1042 | 88 | 27 | 24 | 10  | 95 | 72  | 0.28 | 0.09 | 0.08 | 0.03 | 0.30 | 0.23 |
| 1043 | 91 | 50 | 13 | 1   | 92 | 83  | 0.28 | 0.15 | 0.04 | 0.00 | 0.28 | 0.25 |
| 1044 | 94 | 72 | 10 | 0   | 87 | 89  | 0.27 | 0.20 | 0.03 | 0.00 | 0.25 | 0.25 |
| 1045 | 96 | 85 | 4  | 1   | 82 | 94  | 0.27 | 0.23 | 0.01 | 0.00 | 0.23 | 0.26 |
| 1046 | 63 | 66 | 75 | 3   | 15 | 78  | 0.21 | 0.22 | 0.25 | 0.01 | 0.05 | 0.26 |
| 1047 | 78 | 14 | 96 | 1   | 75 | 96  | 0.22 | 0.04 | 0.27 | 0.00 | 0.21 | 0.27 |
| 1048 | 43 | 9  | 95 | 7   | 69 | 97  | 0.13 | 0.03 | 0.30 | 0.02 | 0.22 | 0.30 |
| 1049 | 77 | 7  | 91 | 16  | 60 | 97  | 0.22 | 0.02 | 0.26 | 0.05 | 0.17 | 0.28 |
| 1050 | 77 | 6  | 81 | 24  | 43 | 93  | 0.24 | 0.02 | 0.25 | 0.07 | 0.13 | 0.29 |

---

|      |    |    |    |     |    |    |      |      |      |      |      |      |
|------|----|----|----|-----|----|----|------|------|------|------|------|------|
| 1051 | 78 | 5  | 69 | 42  | 26 | 90 | 0.25 | 0.02 | 0.22 | 0.14 | 0.08 | 0.29 |
| 1052 | 81 | 10 | 55 | 72  | 21 | 92 | 0.24 | 0.03 | 0.17 | 0.22 | 0.06 | 0.28 |
| 1053 | 83 | 16 | 40 | 91  | 19 | 89 | 0.25 | 0.05 | 0.12 | 0.27 | 0.06 | 0.26 |
| 1054 | 83 | 23 | 21 | 81  | 18 | 84 | 0.27 | 0.07 | 0.07 | 0.26 | 0.06 | 0.27 |
| 1055 | 84 | 43 | 10 | 81  | 16 | 80 | 0.27 | 0.14 | 0.03 | 0.26 | 0.05 | 0.25 |
| 1056 | 96 | 64 | 5  | 80  | 12 | 76 | 0.29 | 0.19 | 0.02 | 0.24 | 0.04 | 0.23 |
| 1057 | 87 | 77 | 4  | 78  | 7  | 73 | 0.27 | 0.24 | 0.01 | 0.24 | 0.02 | 0.22 |
| 1058 | 87 | 92 | 4  | 72  | 2  | 72 | 0.26 | 0.28 | 0.01 | 0.22 | 0.01 | 0.22 |
| 1059 | 87 | 97 | 2  | 55  | 2  | 34 | 0.31 | 0.35 | 0.01 | 0.20 | 0.01 | 0.12 |
| 1060 | 89 | 97 | 0  | 35  | 3  | 1  | 0.40 | 0.43 | 0.00 | 0.16 | 0.01 | 0.00 |
| 1061 | 78 | 2  | 15 | 20  | 2  | 2  | 0.66 | 0.02 | 0.13 | 0.17 | 0.02 | 0.02 |
| 1062 | 77 | 2  | 64 | 20  | 2  | 1  | 0.46 | 0.01 | 0.39 | 0.12 | 0.01 | 0.01 |
| 1063 | 76 | 3  | 89 | 26  | 2  | 1  | 0.39 | 0.02 | 0.45 | 0.13 | 0.01 | 0.01 |
| 1064 | 76 | 2  | 81 | 44  | 0  | 2  | 0.37 | 0.01 | 0.40 | 0.21 | 0.00 | 0.01 |
| 1065 | 77 | 2  | 64 | 66  | 42 | 1  | 0.31 | 0.01 | 0.25 | 0.26 | 0.17 | 0.00 |
| 1066 | 79 | 6  | 50 | 84  | 73 | 1  | 0.27 | 0.02 | 0.17 | 0.29 | 0.25 | 0.00 |
| 1067 | 79 | 14 | 33 | 98  | 75 | 1  | 0.26 | 0.05 | 0.11 | 0.33 | 0.25 | 0.00 |
| 1068 | 75 | 23 | 15 | 100 | 80 | 10 | 0.25 | 0.08 | 0.05 | 0.33 | 0.26 | 0.03 |
| 1069 | 77 | 43 | 6  | 100 | 80 | 12 | 0.24 | 0.14 | 0.02 | 0.31 | 0.25 | 0.04 |
| 1070 | 78 | 60 | 2  | 100 | 89 | 10 | 0.23 | 0.18 | 0.01 | 0.29 | 0.26 | 0.03 |
| 1071 | 79 | 74 | 1  | 87  | 93 | 13 | 0.23 | 0.21 | 0.00 | 0.25 | 0.27 | 0.04 |
| 1072 | 78 | 86 | 3  | 66  | 94 | 17 | 0.23 | 0.25 | 0.01 | 0.19 | 0.27 | 0.05 |
| 1073 | 77 | 95 | 8  | 39  | 94 | 21 | 0.23 | 0.28 | 0.02 | 0.12 | 0.28 | 0.06 |
| 1074 | 76 | 98 | 15 | 22  | 92 | 36 | 0.22 | 0.29 | 0.04 | 0.06 | 0.27 | 0.11 |
| 1075 | 73 | 97 | 22 | 12  | 90 | 53 | 0.21 | 0.28 | 0.06 | 0.03 | 0.26 | 0.15 |
| 1076 | 65 | 89 | 23 | 2   | 85 | 65 | 0.20 | 0.27 | 0.07 | 0.01 | 0.26 | 0.20 |
| 1077 | 50 | 69 | 22 | 1   | 77 | 74 | 0.17 | 0.24 | 0.08 | 0.00 | 0.26 | 0.25 |
| 1078 | 53 | 51 | 45 | 1   | 70 | 81 | 0.18 | 0.17 | 0.15 | 0.00 | 0.23 | 0.27 |
| 1079 | 56 | 34 | 65 | 1   | 63 | 87 | 0.18 | 0.11 | 0.21 | 0.00 | 0.21 | 0.28 |
| 1080 | 63 | 23 | 82 | 7   | 55 | 91 | 0.20 | 0.07 | 0.26 | 0.02 | 0.17 | 0.28 |
| 1081 | 73 | 21 | 94 | 16  | 44 | 93 | 0.21 | 0.06 | 0.28 | 0.05 | 0.13 | 0.27 |
| 1082 | 75 | 15 | 97 | 29  | 28 | 92 | 0.22 | 0.04 | 0.29 | 0.09 | 0.08 | 0.27 |
| 1083 | 74 | 7  | 95 | 49  | 19 | 93 | 0.22 | 0.02 | 0.28 | 0.15 | 0.06 | 0.28 |
| 1084 | 73 | 1  | 87 | 74  | 16 | 96 | 0.21 | 0.00 | 0.25 | 0.21 | 0.05 | 0.28 |
| 1085 | 74 | 1  | 76 | 79  | 15 | 93 | 0.22 | 0.00 | 0.22 | 0.23 | 0.04 | 0.28 |
| 1086 | 74 | 1  | 63 | 79  | 14 | 90 | 0.23 | 0.00 | 0.20 | 0.25 | 0.04 | 0.28 |
| 1087 | 75 | 2  | 49 | 79  | 13 | 87 | 0.25 | 0.01 | 0.16 | 0.26 | 0.04 | 0.29 |
| 1088 | 66 | 8  | 31 | 82  | 15 | 69 | 0.24 | 0.03 | 0.11 | 0.30 | 0.06 | 0.25 |
| 1089 | 71 | 37 | 7  | 79  | 11 | 85 | 0.24 | 0.13 | 0.02 | 0.27 | 0.04 | 0.29 |
| 1090 | 72 | 56 | 3  | 78  | 8  | 84 | 0.24 | 0.19 | 0.01 | 0.26 | 0.03 | 0.28 |
| 1091 | 72 | 73 | 3  | 72  | 1  | 74 | 0.24 | 0.25 | 0.01 | 0.24 | 0.00 | 0.25 |
| 1092 | 76 | 66 | 0  | 57  | 1  | 7  | 0.37 | 0.32 | 0.00 | 0.28 | 0.00 | 0.03 |
| 1093 | 76 | 26 | 1  | 36  | 3  | 1  | 0.53 | 0.18 | 0.01 | 0.25 | 0.02 | 0.01 |
| 1094 | 62 | 7  | 1  | 29  | 1  | 2  | 0.61 | 0.07 | 0.01 | 0.28 | 0.01 | 0.02 |

---

|      |    |    |    |     |    |    |      |      |      |      |      |      |
|------|----|----|----|-----|----|----|------|------|------|------|------|------|
| 1095 | 66 | 1  | 21 | 43  | 0  | 2  | 0.50 | 0.01 | 0.16 | 0.32 | 0.00 | 0.02 |
| 1096 | 66 | 1  | 54 | 67  | 9  | 2  | 0.33 | 0.01 | 0.27 | 0.34 | 0.05 | 0.01 |
| 1097 | 65 | 1  | 58 | 86  | 76 | 1  | 0.23 | 0.00 | 0.20 | 0.30 | 0.26 | 0.00 |
| 1098 | 64 | 2  | 43 | 96  | 86 | 1  | 0.22 | 0.01 | 0.15 | 0.33 | 0.29 | 0.00 |
| 1099 | 63 | 9  | 26 | 100 | 86 | 6  | 0.22 | 0.03 | 0.09 | 0.34 | 0.30 | 0.02 |
| 1100 | 62 | 35 | 4  | 90  | 99 | 6  | 0.21 | 0.12 | 0.01 | 0.30 | 0.33 | 0.02 |
| 1101 | 62 | 35 | 4  | 89  | 93 | 4  | 0.22 | 0.12 | 0.01 | 0.31 | 0.32 | 0.01 |
| 1102 | 62 | 66 | 1  | 70  | 92 | 8  | 0.21 | 0.22 | 0.00 | 0.23 | 0.31 | 0.03 |
| 1103 | 62 | 79 | 4  | 49  | 89 | 13 | 0.21 | 0.27 | 0.01 | 0.17 | 0.30 | 0.04 |
| 1104 | 81 | 21 | 94 | 25  | 80 | 20 | 0.25 | 0.07 | 0.29 | 0.08 | 0.25 | 0.06 |
| 1105 | 79 | 16 | 99 | 13  | 80 | 35 | 0.25 | 0.05 | 0.31 | 0.04 | 0.25 | 0.11 |
| 1106 | 77 | 10 | 95 | 3   | 74 | 36 | 0.26 | 0.03 | 0.32 | 0.01 | 0.25 | 0.12 |
| 1107 | 78 | 7  | 82 | 1   | 65 | 56 | 0.27 | 0.02 | 0.28 | 0.00 | 0.22 | 0.19 |
| 1108 | 81 | 11 | 64 | 1   | 56 | 65 | 0.29 | 0.04 | 0.23 | 0.00 | 0.20 | 0.23 |
| 1109 | 84 | 18 | 33 | 2   | 48 | 72 | 0.33 | 0.07 | 0.13 | 0.01 | 0.19 | 0.28 |
| 1110 | 89 | 41 | 5  | 7   | 40 | 79 | 0.34 | 0.16 | 0.02 | 0.03 | 0.15 | 0.30 |
| 1111 | 90 | 62 | 2  | 16  | 27 | 83 | 0.32 | 0.22 | 0.01 | 0.06 | 0.10 | 0.30 |
| 1112 | 90 | 82 | 2  | 32  | 17 | 87 | 0.29 | 0.26 | 0.01 | 0.10 | 0.05 | 0.28 |
| 1113 | 87 | 99 | 8  | 53  | 14 | 92 | 0.25 | 0.28 | 0.02 | 0.15 | 0.04 | 0.26 |
| 1114 | 89 | 54 | 0  | 74  | 9  | 94 | 0.28 | 0.17 | 0.00 | 0.23 | 0.03 | 0.29 |
| 1115 | 21 | 1  | 4  | 78  | 10 | 94 | 0.10 | 0.00 | 0.02 | 0.38 | 0.05 | 0.45 |
| 1116 | 13 | 2  | 2  | 79  | 13 | 92 | 0.06 | 0.01 | 0.01 | 0.39 | 0.06 | 0.46 |
| 1117 | 65 | 1  | 13 | 79  | 13 | 91 | 0.25 | 0.00 | 0.05 | 0.30 | 0.05 | 0.35 |
| 1118 | 68 | 1  | 80 | 79  | 12 | 91 | 0.21 | 0.00 | 0.24 | 0.24 | 0.04 | 0.27 |
| 1119 | 68 | 1  | 75 | 77  | 9  | 95 | 0.21 | 0.00 | 0.23 | 0.24 | 0.03 | 0.29 |
| 1120 | 68 | 1  | 60 | 76  | 1  | 45 | 0.27 | 0.00 | 0.24 | 0.30 | 0.00 | 0.18 |
| 1121 | 69 | 2  | 43 | 56  | 5  | 1  | 0.39 | 0.01 | 0.24 | 0.32 | 0.03 | 0.01 |
| 1122 | 67 | 12 | 24 | 40  | 2  | 2  | 0.46 | 0.08 | 0.16 | 0.27 | 0.01 | 0.01 |
| 1123 | 65 | 29 | 9  | 62  | 0  | 4  | 0.38 | 0.17 | 0.05 | 0.37 | 0.00 | 0.02 |
| 1124 | 67 | 50 | 2  | 90  | 44 | 1  | 0.26 | 0.20 | 0.01 | 0.35 | 0.17 | 0.00 |
| 1125 | 68 | 70 | 2  | 94  | 94 | 2  | 0.21 | 0.21 | 0.01 | 0.28 | 0.28 | 0.01 |
| 1126 | 68 | 87 | 7  | 100 | 89 | 6  | 0.19 | 0.24 | 0.02 | 0.28 | 0.25 | 0.02 |
| 1127 | 65 | 96 | 16 | 100 | 88 | 7  | 0.17 | 0.26 | 0.04 | 0.27 | 0.24 | 0.02 |
| 1128 | 59 | 95 | 24 | 100 | 89 | 4  | 0.16 | 0.26 | 0.06 | 0.27 | 0.24 | 0.01 |
| 1129 | 41 | 81 | 23 | 91  | 89 | 0  | 0.13 | 0.25 | 0.07 | 0.28 | 0.27 | 0.00 |
| 1130 | 40 | 59 | 51 | 72  | 85 | 3  | 0.13 | 0.19 | 0.16 | 0.23 | 0.27 | 0.01 |
| 1131 | 47 | 37 | 77 | 51  | 81 | 6  | 0.16 | 0.12 | 0.26 | 0.17 | 0.27 | 0.02 |
| 1132 | 58 | 22 | 92 | 30  | 75 | 10 | 0.20 | 0.08 | 0.32 | 0.10 | 0.26 | 0.03 |
| 1133 | 67 | 17 | 95 | 14  | 68 | 18 | 0.24 | 0.06 | 0.34 | 0.05 | 0.24 | 0.06 |
| 1134 | 69 | 6  | 88 | 4   | 61 | 28 | 0.27 | 0.02 | 0.34 | 0.02 | 0.24 | 0.11 |
| 1135 | 69 | 1  | 72 | 1   | 51 | 38 | 0.30 | 0.00 | 0.31 | 0.00 | 0.22 | 0.16 |
| 1136 | 69 | 2  | 51 | 1   | 42 | 47 | 0.33 | 0.01 | 0.24 | 0.00 | 0.20 | 0.22 |
| 1137 | 67 | 11 | 32 | 13  | 33 | 57 | 0.31 | 0.05 | 0.15 | 0.06 | 0.15 | 0.27 |
| 1138 | 64 | 25 | 12 | 8   | 24 | 65 | 0.32 | 0.13 | 0.06 | 0.04 | 0.12 | 0.33 |

|      |    |    |    |     |    |    |      |      |      |      |      |      |
|------|----|----|----|-----|----|----|------|------|------|------|------|------|
| 1139 | 67 | 49 | 2  | 19  | 15 | 72 | 0.30 | 0.22 | 0.01 | 0.08 | 0.07 | 0.32 |
| 1140 | 68 | 70 | 2  | 37  | 9  | 79 | 0.26 | 0.26 | 0.01 | 0.14 | 0.03 | 0.30 |
| 1141 | 68 | 88 | 3  | 56  | 6  | 85 | 0.22 | 0.29 | 0.01 | 0.18 | 0.02 | 0.28 |
| 1142 | 70 | 96 | 2  | 74  | 7  | 89 | 0.21 | 0.28 | 0.01 | 0.22 | 0.02 | 0.26 |
| 1143 | 68 | 20 | 1  | 78  | 9  | 90 | 0.26 | 0.08 | 0.00 | 0.29 | 0.03 | 0.34 |
| 1144 | 15 | 1  | 2  | 79  | 12 | 90 | 0.08 | 0.01 | 0.01 | 0.40 | 0.06 | 0.45 |
| 1145 | 7  | 2  | 2  | 79  | 13 | 92 | 0.04 | 0.01 | 0.01 | 0.41 | 0.07 | 0.47 |
| 1146 | 39 | 4  | 0  | 78  | 13 | 95 | 0.17 | 0.02 | 0.00 | 0.34 | 0.06 | 0.41 |
| 1147 | 43 | 0  | 60 | 78  | 8  | 81 | 0.16 | 0.00 | 0.22 | 0.29 | 0.03 | 0.30 |
| 1148 | 44 | 2  | 82 | 76  | 1  | 5  | 0.21 | 0.01 | 0.39 | 0.36 | 0.00 | 0.02 |
| 1149 | 43 | 7  | 66 | 57  | 2  | 2  | 0.24 | 0.04 | 0.37 | 0.32 | 0.01 | 0.01 |
| 1150 | 44 | 3  | 50 | 78  | 5  | 1  | 0.24 | 0.02 | 0.28 | 0.43 | 0.03 | 0.01 |
| 1151 | 43 | 2  | 33 | 98  | 77 | 1  | 0.17 | 0.01 | 0.13 | 0.39 | 0.30 | 0.00 |
| 1152 | 44 | 6  | 17 | 100 | 91 | 6  | 0.17 | 0.02 | 0.06 | 0.38 | 0.34 | 0.02 |
| 1153 | 44 | 20 | 5  | 100 | 86 | 6  | 0.17 | 0.08 | 0.02 | 0.38 | 0.33 | 0.02 |
| 1154 | 45 | 38 | 2  | 100 | 84 | 6  | 0.16 | 0.14 | 0.01 | 0.36 | 0.31 | 0.02 |
| 1155 | 43 | 59 | 2  | 95  | 81 | 0  | 0.15 | 0.21 | 0.01 | 0.34 | 0.29 | 0.00 |
| 1156 | 41 | 77 | 10 | 78  | 76 | 1  | 0.14 | 0.27 | 0.04 | 0.28 | 0.27 | 0.00 |
| 1157 | 36 | 91 | 20 | 56  | 70 | 2  | 0.13 | 0.33 | 0.07 | 0.20 | 0.25 | 0.01 |
| 1158 | 29 | 96 | 31 | 36  | 62 | 3  | 0.11 | 0.37 | 0.12 | 0.14 | 0.24 | 0.01 |
| 1159 | 27 | 93 | 52 | 18  | 54 | 7  | 0.11 | 0.37 | 0.21 | 0.07 | 0.22 | 0.03 |
| 1160 | 26 | 80 | 73 | 5   | 45 | 15 | 0.11 | 0.33 | 0.30 | 0.02 | 0.18 | 0.06 |
| 1161 | 25 | 60 | 86 | 2   | 35 | 23 | 0.11 | 0.26 | 0.37 | 0.01 | 0.15 | 0.10 |
| 1162 | 29 | 39 | 91 | 1   | 35 | 36 | 0.13 | 0.17 | 0.39 | 0.00 | 0.15 | 0.16 |
| 1163 | 35 | 22 | 88 | 1   | 48 | 41 | 0.15 | 0.09 | 0.37 | 0.00 | 0.20 | 0.17 |
| 1164 | 41 | 13 | 78 | 9   | 12 | 99 | 0.16 | 0.05 | 0.31 | 0.04 | 0.05 | 0.39 |
| 1165 | 44 | 4  | 60 | 23  | 5  | 59 | 0.23 | 0.02 | 0.31 | 0.12 | 0.03 | 0.30 |
| 1166 | 44 | 1  | 40 | 41  | 3  | 61 | 0.23 | 0.01 | 0.21 | 0.22 | 0.02 | 0.32 |
| 1167 | 44 | 5  | 22 | 63  | 3  | 75 | 0.21 | 0.02 | 0.10 | 0.30 | 0.01 | 0.35 |
| 1168 | 44 | 18 | 7  | 77  | 5  | 80 | 0.19 | 0.08 | 0.03 | 0.33 | 0.02 | 0.35 |
| 1169 | 45 | 37 | 2  | 79  | 11 | 82 | 0.18 | 0.14 | 0.01 | 0.31 | 0.04 | 0.32 |
| 1170 | 44 | 59 | 3  | 80  | 15 | 84 | 0.15 | 0.21 | 0.01 | 0.28 | 0.05 | 0.29 |
| 1171 | 42 | 78 | 6  | 80  | 15 | 86 | 0.14 | 0.25 | 0.02 | 0.26 | 0.05 | 0.28 |
| 1172 | 43 | 95 | 7  | 78  | 13 | 95 | 0.13 | 0.29 | 0.02 | 0.24 | 0.04 | 0.29 |
| 1173 | 53 | 81 | 0  | 80  | 7  | 42 | 0.20 | 0.31 | 0.00 | 0.30 | 0.03 | 0.16 |
| 1174 | 40 | 1  | 2  | 95  | 55 | 0  | 0.21 | 0.01 | 0.01 | 0.49 | 0.28 | 0.00 |
| 1175 | 8  | 2  | 2  | 100 | 89 | 6  | 0.04 | 0.01 | 0.01 | 0.48 | 0.43 | 0.03 |
| 1176 | 3  | 1  | 1  | 97  | 81 | 2  | 0.02 | 0.01 | 0.01 | 0.52 | 0.44 | 0.01 |
| 1177 | 17 | 0  | 2  | 94  | 74 | 1  | 0.09 | 0.00 | 0.01 | 0.50 | 0.39 | 0.01 |
| 1178 | 21 | 47 | 7  | 76  | 69 | 1  | 0.10 | 0.21 | 0.03 | 0.34 | 0.31 | 0.00 |
| 1179 | 18 | 67 | 20 | 59  | 64 | 0  | 0.08 | 0.29 | 0.09 | 0.26 | 0.28 | 0.00 |
| 1180 | 17 | 84 | 40 | 42  | 56 | 0  | 0.07 | 0.35 | 0.17 | 0.18 | 0.23 | 0.00 |
| 1181 | 18 | 96 | 58 | 27  | 47 | 1  | 0.07 | 0.39 | 0.23 | 0.11 | 0.19 | 0.00 |
| 1182 | 18 | 99 | 76 | 14  | 37 | 2  | 0.07 | 0.40 | 0.31 | 0.06 | 0.15 | 0.01 |



|      |    |    |    |     |    |    |      |      |      |      |      |      |
|------|----|----|----|-----|----|----|------|------|------|------|------|------|
| 1183 | 18 | 93 | 91 | 4   | 29 | 6  | 0.07 | 0.39 | 0.38 | 0.02 | 0.12 | 0.02 |
| 1184 | 17 | 78 | 96 | 3   | 19 | 13 | 0.08 | 0.35 | 0.42 | 0.01 | 0.08 | 0.06 |
| 1185 | 17 | 61 | 94 | 2   | 12 | 19 | 0.08 | 0.30 | 0.46 | 0.01 | 0.06 | 0.09 |
| 1186 | 17 | 40 | 84 | 1   | 7  | 26 | 0.10 | 0.23 | 0.48 | 0.01 | 0.04 | 0.15 |
| 1187 | 19 | 22 | 68 | 5   | 2  | 34 | 0.13 | 0.15 | 0.45 | 0.03 | 0.01 | 0.23 |
| 1188 | 21 | 9  | 48 | 13  | 2  | 43 | 0.15 | 0.07 | 0.35 | 0.10 | 0.01 | 0.32 |
| 1189 | 22 | 2  | 28 | 23  | 1  | 52 | 0.17 | 0.02 | 0.22 | 0.18 | 0.01 | 0.41 |
| 1190 | 22 | 2  | 13 | 33  | 1  | 61 | 0.17 | 0.02 | 0.10 | 0.25 | 0.01 | 0.46 |
| 1191 | 22 | 10 | 3  | 45  | 0  | 69 | 0.15 | 0.07 | 0.02 | 0.30 | 0.00 | 0.46 |
| 1192 | 23 | 26 | 2  | 49  | 1  | 77 | 0.13 | 0.15 | 0.01 | 0.28 | 0.01 | 0.43 |
| 1193 | 21 | 47 | 6  | 47  | 1  | 84 | 0.10 | 0.23 | 0.03 | 0.23 | 0.00 | 0.41 |
| 1194 | 18 | 66 | 20 | 55  | 2  | 91 | 0.07 | 0.26 | 0.08 | 0.22 | 0.01 | 0.36 |
| 1195 | 18 | 85 | 36 | 79  | 13 | 93 | 0.06 | 0.26 | 0.11 | 0.24 | 0.04 | 0.29 |
| 1196 | 18 | 96 | 32 | 95  | 55 | 0  | 0.06 | 0.32 | 0.11 | 0.32 | 0.19 | 0.00 |
| 1197 | 28 | 43 | 0  | 100 | 89 | 6  | 0.11 | 0.16 | 0.00 | 0.38 | 0.33 | 0.02 |
| 1198 | 17 | 0  | 3  | 97  | 81 | 2  | 0.09 | 0.00 | 0.02 | 0.49 | 0.41 | 0.01 |
| 1199 | 4  | 2  | 1  | 91  | 74 | 1  | 0.02 | 0.01 | 0.01 | 0.53 | 0.43 | 0.01 |
| 1200 | 1  | 0  | 0  | 76  | 69 | 1  | 0.01 | 0.00 | 0.00 | 0.52 | 0.47 | 0.01 |
| 1201 | 4  | 1  | 1  | 59  | 64 | 0  | 0.03 | 0.01 | 0.01 | 0.46 | 0.50 | 0.00 |
| 1202 | 11 | 30 | 0  | 42  | 56 | 0  | 0.08 | 0.22 | 0.00 | 0.30 | 0.40 | 0.00 |
| 1203 | 6  | 78 | 62 | 27  | 47 | 1  | 0.03 | 0.35 | 0.28 | 0.12 | 0.21 | 0.00 |
| 1204 | 5  | 76 | 81 | 14  | 37 | 2  | 0.02 | 0.35 | 0.38 | 0.07 | 0.17 | 0.01 |
| 1205 | 5  | 54 | 63 | 4   | 29 | 6  | 0.03 | 0.34 | 0.39 | 0.02 | 0.18 | 0.04 |
| 1206 | 5  | 34 | 48 | 3   | 19 | 13 | 0.04 | 0.28 | 0.39 | 0.02 | 0.16 | 0.11 |
| 1207 | 6  | 17 | 31 | 2   | 12 | 19 | 0.07 | 0.20 | 0.36 | 0.02 | 0.14 | 0.22 |
| 1208 | 6  | 4  | 15 | 1   | 7  | 26 | 0.10 | 0.07 | 0.25 | 0.02 | 0.12 | 0.44 |
| 1209 | 4  | 2  | 4  | 5   | 2  | 34 | 0.08 | 0.04 | 0.08 | 0.10 | 0.04 | 0.67 |
| 1210 | 6  | 5  | 2  | 13  | 2  | 43 | 0.08 | 0.07 | 0.03 | 0.18 | 0.03 | 0.61 |
| 1211 | 6  | 17 | 4  | 23  | 1  | 52 | 0.06 | 0.17 | 0.04 | 0.22 | 0.01 | 0.50 |
| 1212 | 5  | 36 | 16 | 33  | 1  | 61 | 0.03 | 0.24 | 0.11 | 0.22 | 0.01 | 0.40 |
| 1213 | 5  | 57 | 34 | 45  | 0  | 69 | 0.02 | 0.27 | 0.16 | 0.21 | 0.00 | 0.33 |
| 1214 | 6  | 75 | 54 | 49  | 1  | 77 | 0.02 | 0.29 | 0.21 | 0.19 | 0.00 | 0.29 |
| 1215 | 5  | 91 | 73 | 47  | 1  | 84 | 0.02 | 0.30 | 0.24 | 0.16 | 0.00 | 0.28 |
| 1216 | 6  | 98 | 87 | 55  | 2  | 91 | 0.02 | 0.29 | 0.26 | 0.16 | 0.01 | 0.27 |
| 1217 | 5  | 97 | 96 | 79  | 13 | 93 | 0.01 | 0.25 | 0.25 | 0.21 | 0.03 | 0.24 |
| 1218 | 6  | 88 | 96 | 9   | 80 | 9  | 0.02 | 0.31 | 0.33 | 0.03 | 0.28 | 0.03 |
| 1219 | 5  | 73 | 91 | 4   | 68 | 2  | 0.02 | 0.30 | 0.37 | 0.02 | 0.28 | 0.01 |
| 1220 | 5  | 55 | 76 | 6   | 58 | 2  | 0.02 | 0.27 | 0.38 | 0.03 | 0.29 | 0.01 |
| 1221 | 5  | 35 | 58 | 6   | 48 | 2  | 0.03 | 0.23 | 0.38 | 0.04 | 0.31 | 0.01 |
| 1222 | 5  | 18 | 37 | 5   | 38 | 1  | 0.05 | 0.17 | 0.36 | 0.05 | 0.37 | 0.01 |
| 1223 | 6  | 5  | 19 | 5   | 29 | 1  | 0.09 | 0.08 | 0.29 | 0.08 | 0.45 | 0.02 |
| 1224 | 5  | 2  | 5  | 2   | 22 | 1  | 0.14 | 0.05 | 0.14 | 0.05 | 0.59 | 0.03 |
| 1225 | 6  | 4  | 2  | 2   | 14 | 2  | 0.20 | 0.13 | 0.07 | 0.07 | 0.47 | 0.07 |
| 1226 | 6  | 17 | 4  | 2   | 7  | 4  | 0.15 | 0.43 | 0.10 | 0.05 | 0.18 | 0.10 |

---

|      |    |    |    |    |    |    |      |      |      |      |      |      |
|------|----|----|----|----|----|----|------|------|------|------|------|------|
| 1227 | 6  | 35 | 16 | 1  | 3  | 8  | 0.09 | 0.51 | 0.23 | 0.01 | 0.04 | 0.12 |
| 1228 | 5  | 56 | 34 | 2  | 3  | 12 | 0.04 | 0.50 | 0.30 | 0.02 | 0.03 | 0.11 |
| 1229 | 6  | 75 | 54 | 2  | 3  | 19 | 0.04 | 0.47 | 0.34 | 0.01 | 0.02 | 0.12 |
| 1230 | 6  | 93 | 79 | 1  | 3  | 26 | 0.03 | 0.45 | 0.38 | 0.00 | 0.01 | 0.13 |
| 1231 | 4  | 93 | 70 | 1  | 3  | 35 | 0.02 | 0.45 | 0.34 | 0.00 | 0.01 | 0.17 |
| 1232 | 7  | 2  | 37 | 1  | 2  | 44 | 0.08 | 0.02 | 0.40 | 0.01 | 0.02 | 0.47 |
| 1233 | 6  | 2  | 2  | 1  | 4  | 53 | 0.09 | 0.03 | 0.03 | 0.01 | 0.06 | 0.78 |
| 1234 | 1  | 1  | 1  | 1  | 5  | 64 | 0.01 | 0.01 | 0.01 | 0.01 | 0.07 | 0.88 |
| 1235 | 0  | 0  | 0  | 0  | 6  | 77 | 0.00 | 0.00 | 0.00 | 0.00 | 0.07 | 0.93 |
| 1236 | 3  | 13 | 1  | 6  | 51 | 1  | 0.04 | 0.17 | 0.01 | 0.08 | 0.68 | 0.01 |
| 1237 | 13 | 69 | 0  | 6  | 37 | 1  | 0.10 | 0.55 | 0.00 | 0.05 | 0.29 | 0.01 |
| 1238 | 2  | 95 | 41 | 5  | 25 | 1  | 0.01 | 0.56 | 0.24 | 0.03 | 0.15 | 0.01 |
| 1239 | 2  | 96 | 89 | 4  | 16 | 2  | 0.01 | 0.46 | 0.43 | 0.02 | 0.08 | 0.01 |
| 1240 | 2  | 82 | 71 | 2  | 10 | 1  | 0.01 | 0.49 | 0.42 | 0.01 | 0.06 | 0.01 |
| 1241 | 2  | 64 | 56 | 2  | 4  | 1  | 0.02 | 0.50 | 0.43 | 0.02 | 0.03 | 0.01 |
| 1242 | 2  | 44 | 39 | 1  | 1  | 1  | 0.02 | 0.50 | 0.44 | 0.01 | 0.01 | 0.01 |
| 1243 | 1  | 25 | 22 | 2  | 5  | 6  | 0.02 | 0.41 | 0.36 | 0.03 | 0.08 | 0.10 |
| 1244 | 2  | 9  | 8  | 1  | 4  | 4  | 0.07 | 0.32 | 0.29 | 0.04 | 0.14 | 0.14 |
| 1245 | 1  | 1  | 1  | 2  | 2  | 8  | 0.07 | 0.07 | 0.07 | 0.13 | 0.13 | 0.53 |
| 1246 | 1  | 1  | 1  | 2  | 3  | 17 | 0.04 | 0.04 | 0.04 | 0.08 | 0.12 | 0.68 |
| 1247 | 2  | 8  | 11 | 2  | 4  | 17 | 0.05 | 0.18 | 0.25 | 0.05 | 0.09 | 0.39 |
| 1248 | 2  | 23 | 27 | 2  | 3  | 21 | 0.03 | 0.29 | 0.35 | 0.03 | 0.04 | 0.27 |
| 1249 | 2  | 44 | 47 | 1  | 3  | 21 | 0.02 | 0.37 | 0.40 | 0.01 | 0.03 | 0.18 |
| 1250 | 1  | 64 | 66 | 1  | 2  | 45 | 0.01 | 0.36 | 0.37 | 0.01 | 0.01 | 0.25 |
| 1251 | 1  | 81 | 83 | 1  | 4  | 33 | 0.00 | 0.40 | 0.41 | 0.00 | 0.02 | 0.16 |
| 1252 | 1  | 94 | 94 | 5  | 11 | 34 | 0.00 | 0.39 | 0.39 | 0.02 | 0.05 | 0.14 |
| 1253 | 2  | 96 | 96 | 6  | 18 | 17 | 0.01 | 0.41 | 0.41 | 0.03 | 0.08 | 0.07 |
| 1254 | 2  | 94 | 94 | 11 | 23 | 1  | 0.01 | 0.42 | 0.42 | 0.05 | 0.10 | 0.00 |
| 1255 | 2  | 82 | 84 | 19 | 33 | 44 | 0.01 | 0.31 | 0.32 | 0.07 | 0.13 | 0.17 |
| 1256 | 2  | 65 | 67 | 22 | 45 | 79 | 0.01 | 0.23 | 0.24 | 0.08 | 0.16 | 0.28 |
| 1257 | 2  | 45 | 47 | 28 | 66 | 77 | 0.01 | 0.17 | 0.18 | 0.11 | 0.25 | 0.29 |
| 1258 | 1  | 26 | 27 | 29 | 55 | 69 | 0.00 | 0.13 | 0.13 | 0.14 | 0.27 | 0.33 |
| 1259 | 2  | 10 | 11 | 33 | 78 | 66 | 0.01 | 0.05 | 0.06 | 0.17 | 0.39 | 0.33 |
| 1260 | 1  | 2  | 2  | 44 | 38 | 91 | 0.01 | 0.01 | 0.01 | 0.25 | 0.21 | 0.51 |

---
